# Supplementary material for: Stewartiacids A–N, C-23 carboxylated triterpenoids from Chinese Stewartia and their inhibitory effects against ATP-citrate lyase and NF-κB
Source: PubMed Central journal article supplement (PMC9048753; doi:10.1039/c9ra09542j), 2020-01-21
Supplement: RA-010-C9RA09542J-s001.pdf [file RA-010-C9RA09542J-s001.pdf]

Supporting Information for

**Stewartiacids A–N, C-23 carboxylated triterpenoids from the Chinese  
Stewartia and their inhibitory effects against ATP-citrate lyase and  
NF- $\kappa$ B**

Jiang Wan,<sup>a,b</sup> Yi Zang,<sup>c</sup> Dao-An Xiao,<sup>d</sup> Na Li,<sup>a</sup> Junmin Li,<sup>a</sup> Ze-Xin Jin,<sup>a</sup> De-Lei Chen,<sup>e</sup> Juan Xiong,<sup>\*b</sup> Jia Li,<sup>\*c</sup> and Jin-Feng Hu<sup>\*a,b</sup>

<sup>a</sup> Institute of Natural Medicine and Health Products, School of Advanced Study, Zhejiang Provincial Key Laboratory of Plant Ecology and Conservation, Taizhou University, Taizhou 318000, Zhejiang, PR China.

<sup>b</sup> School of Pharmacy, Fudan University, No. 826 Zhangheng Road, Shanghai 201203, PR China. E-mail: jfhu@fudan.edu.cn; Telephone/Fax: +86-21-51980172.

<sup>c</sup> State Key Laboratory of Drug Research, Shanghai Institute of Materia Medica, Chinese Academy of Sciences, Shanghai 201203, PR China.

<sup>d</sup> College of Chemistry and Bioengineer, Yichun University, Yichun 336000, PR China.

<sup>e</sup> School of Life Science, Hefei Normal University, Hefei 230601, PR China.

---

\* Corresponding authors. Tel/fax: +86 21 51980172.

E-mail addresses: jxiong@fudan.edu.cn (J. Xiong); jli@simm.ac.cn (J. Li);

jfhu@fudan.edu.cn (J.-F. Hu).

---

| <b>Contents</b>                                                              | <b>page</b> |
|------------------------------------------------------------------------------|-------------|
| Fig. S1. Key HMBC correlation of compounds <b>2, 5, 7, 9, 10, and 14.</b>    | 1           |
| Fig. S2. Diagnostic ROE correlations of compounds <b>2, 5, 7–10, and 13.</b> | 1           |
| Figs. S3–S13: 1D/2D NMR and HRESIMS spectra for compound <b>1</b>            | 2–7         |
| Figs. S14–S22: 1D/2D NMR and HRESIMS spectra for compound <b>2</b>           | 8–12        |
| Fig. S23: ECD spectra of compounds <b>1 and 2</b>                            | 12          |
| Figs. S24–S31: 1D/2D NMR and HRESIMS spectra for compound <b>3</b>           | 13–16       |
| Fig. S32: ECD spectrum of compound <b>3</b>                                  | 17          |
| Figs. S33–S43: 1D/2D NMR and HRESIMS spectra for compound <b>4</b>           | 17–23       |
| Figs. S44–S51: 1D/2D NMR and HRESIMS spectra for compound <b>5</b>           | 23–26       |
| Fig. S52: ECD spectra of compounds <b>4 and 5</b>                            | 27          |
| Figs. S53–S61: 1D/2D NMR and HRESIMS spectra for compound <b>6</b>           | 27–31       |
| Figs. S62–S70: 1D/2D NMR and HRESIMS spectra for compound <b>7</b>           | 32–36       |
| Fig. S70: ECD spectra of compounds <b>6 and 7</b>                            | 36          |
| Figs. S71–S81: 1D/2D NMR and HRESIMS spectra for compound <b>8</b>           | 37–41       |
| Figs. S82–S89: 1D/2D NMR and HRESIMS spectra for compound <b>9</b>           | 43–46       |
| Figs. S90–S97: 1D/2D NMR and HRESIMS spectra for compound <b>10</b>          | 47–50       |
| Figs. S98–S108: 1D/2D NMR and HRESIMS spectra for compound <b>11</b>         | 51–56       |
| Figs. S109–S116: 1D/2D NMR and HRESIMS spectra for compound <b>12</b>        | 56–60       |
| Figs. S117–S124: 1D/2D NMR and HRESIMS spectra for compound <b>13</b>        | 60–64       |
| Figs. S125–S132: 1D/2D NMR and HRESIMS spectra for compound <b>14</b>        | 64–68       |
| Table S1: Crystal data and structure refinement for <b>1</b>                 | 69          |
| Table S2: Crystal data and structure refinement for <b>3</b>                 | 70          |
| Table S3: Crystal data and structure refinement for <b>4</b>                 | 71          |
| Table S4: Crystal data and structure refinement for <b>6</b>                 | 72          |

---

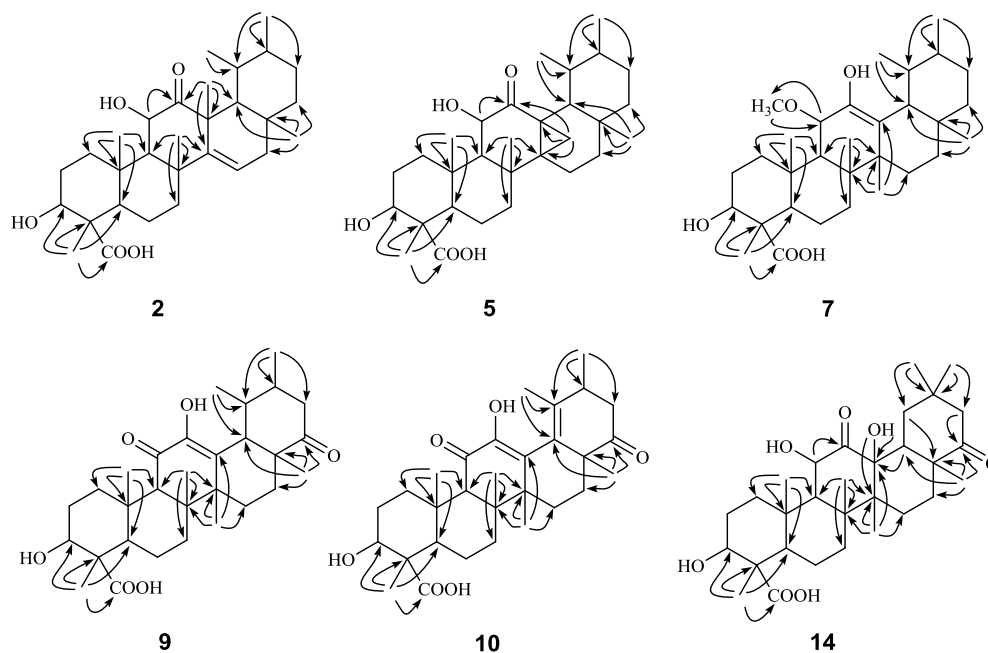

**Fig. S1.** HMBC correlations of compounds 2, 5, 7, 9, 10, and 14.

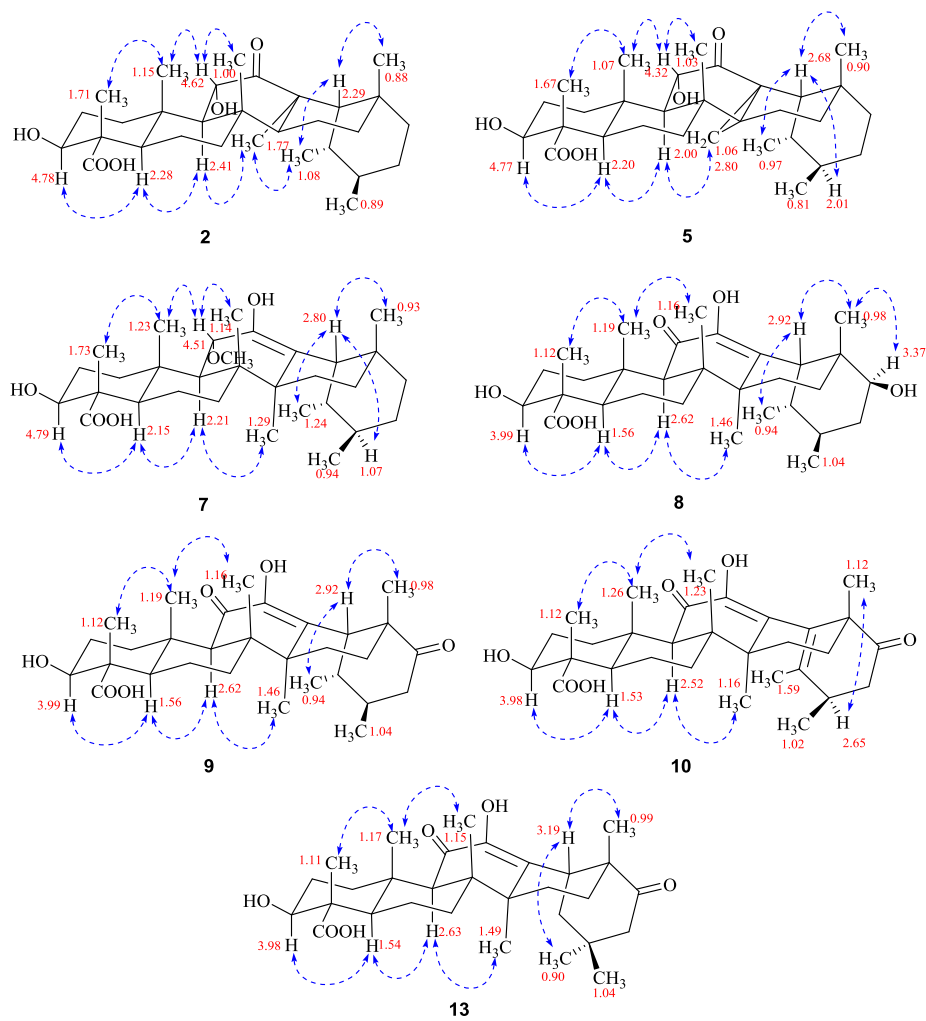

**Fig.S2.** Diagnostic ROE correlations of compounds 2, 5, 7–10, and 13.

**Fig. S3.**  $^1\text{H}$  NMR spectrum of compound **1** in  $\text{CD}_3\text{OD}$  (400 MHz).

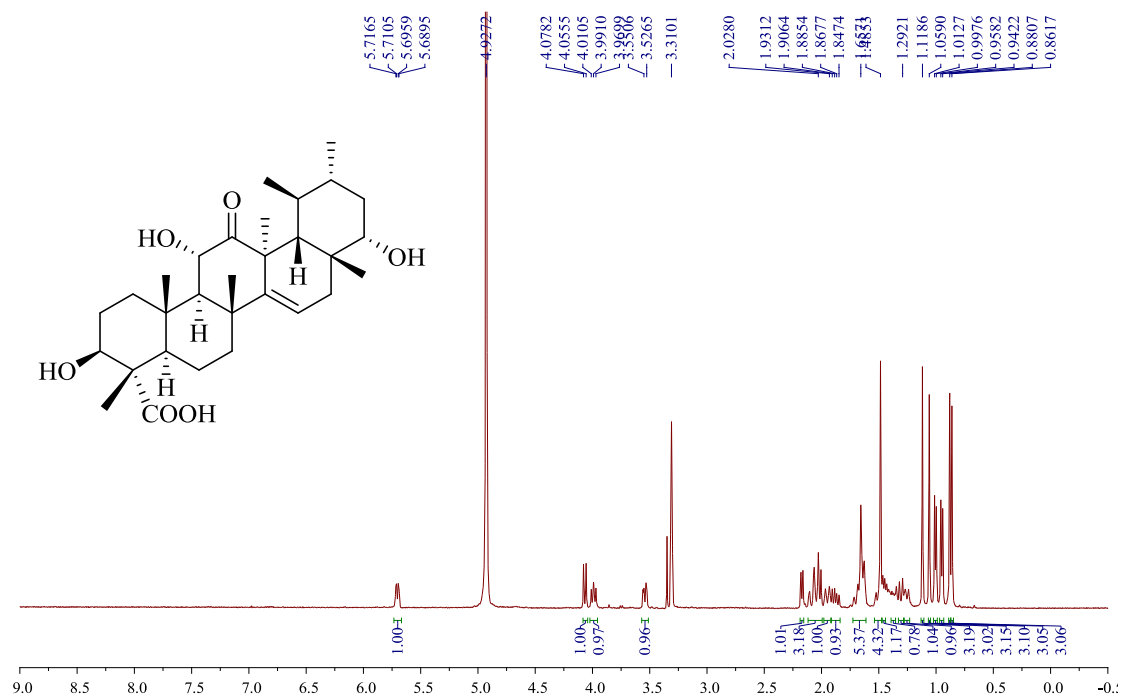

**Fig. S4.**  $^1\text{H}$  NMR spectrum of compound **1** in  $\text{CD}_3\text{OD}$ —expansion.

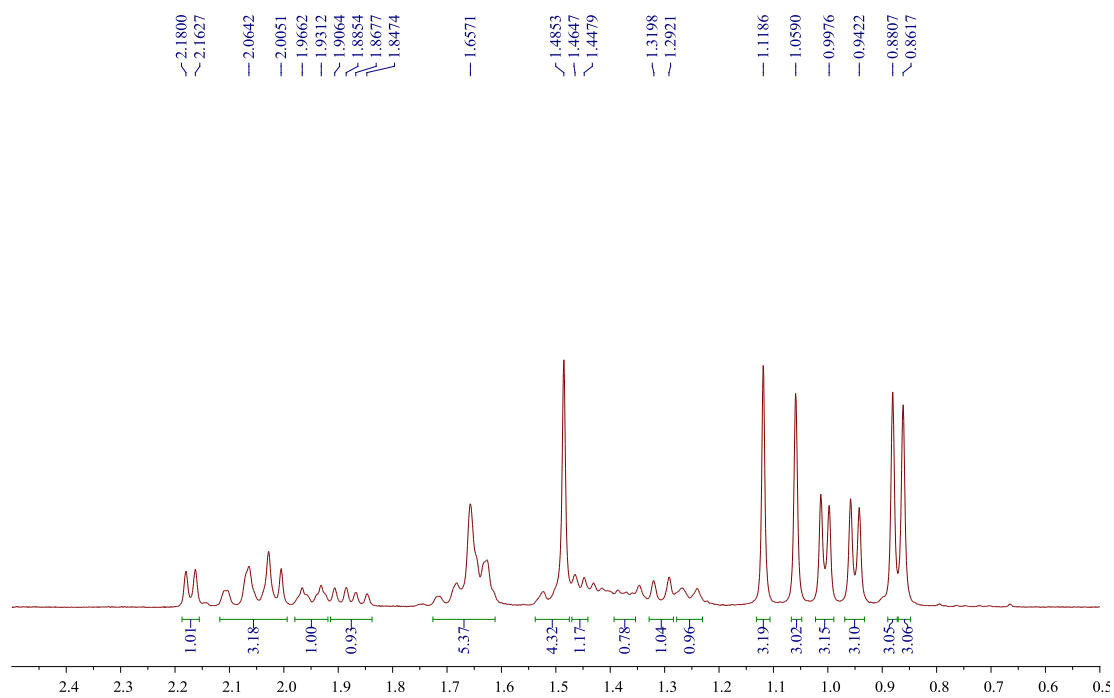

**Fig. S5.**  $^{13}\text{C}$  NMR and DEPT 135 spectra of compound **1** in  $\text{CD}_3\text{OD}$  (150 MHz).

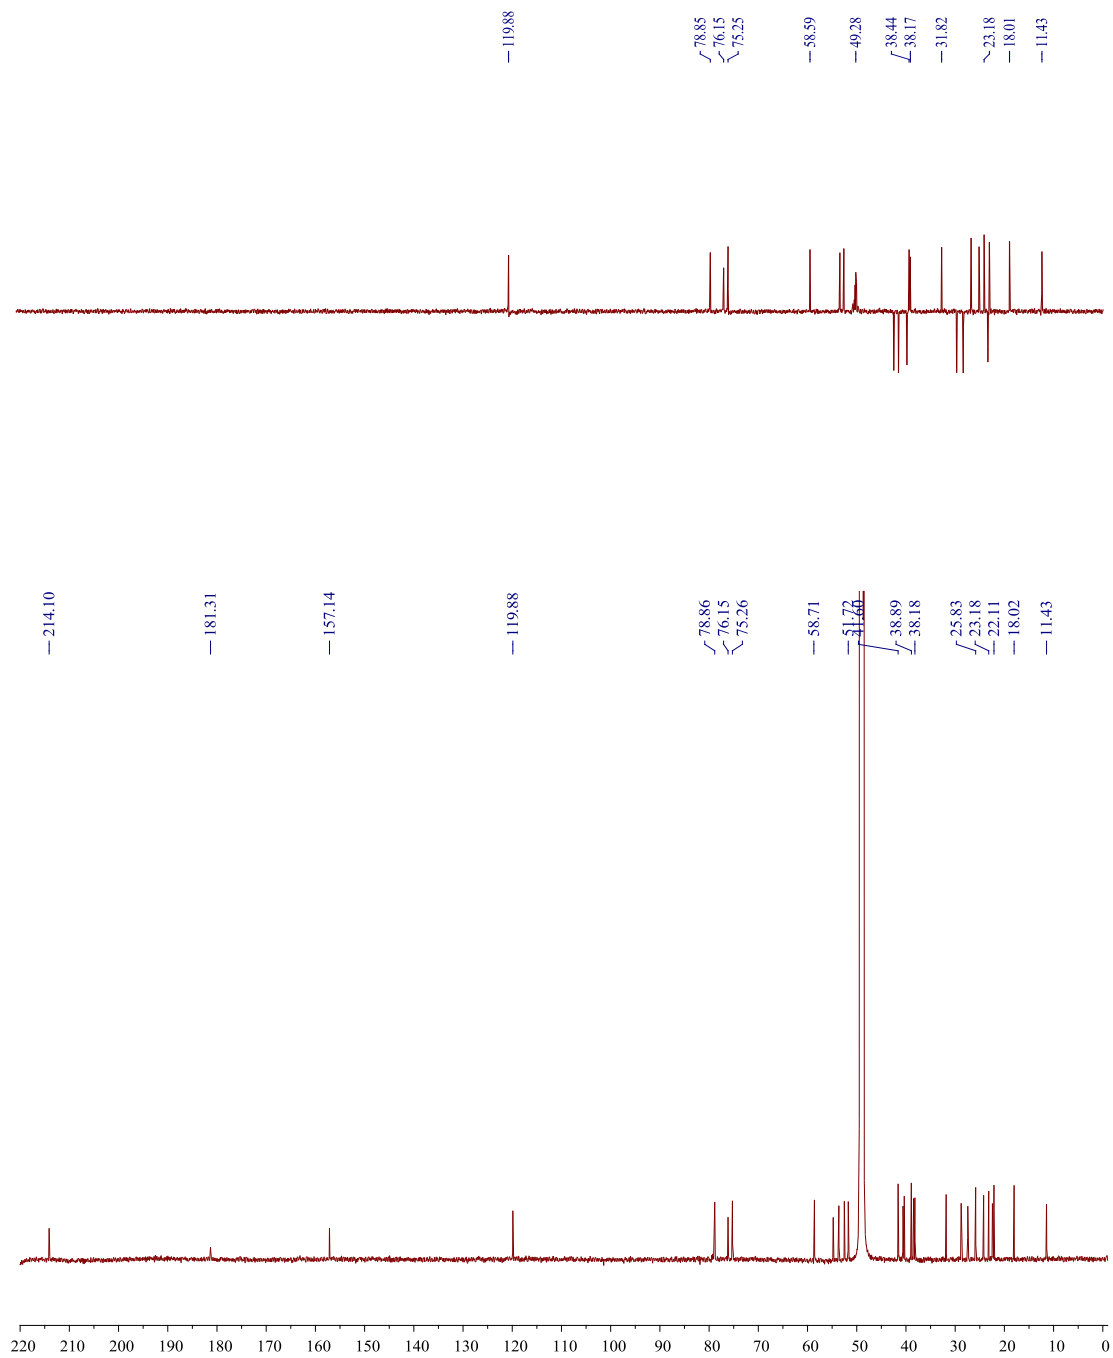

**Fig. S6.**  $^1\text{H}$ - $^1\text{H}$  COSY spectrum of compound **1** in  $\text{CD}_3\text{OD}$  (600 MHz).

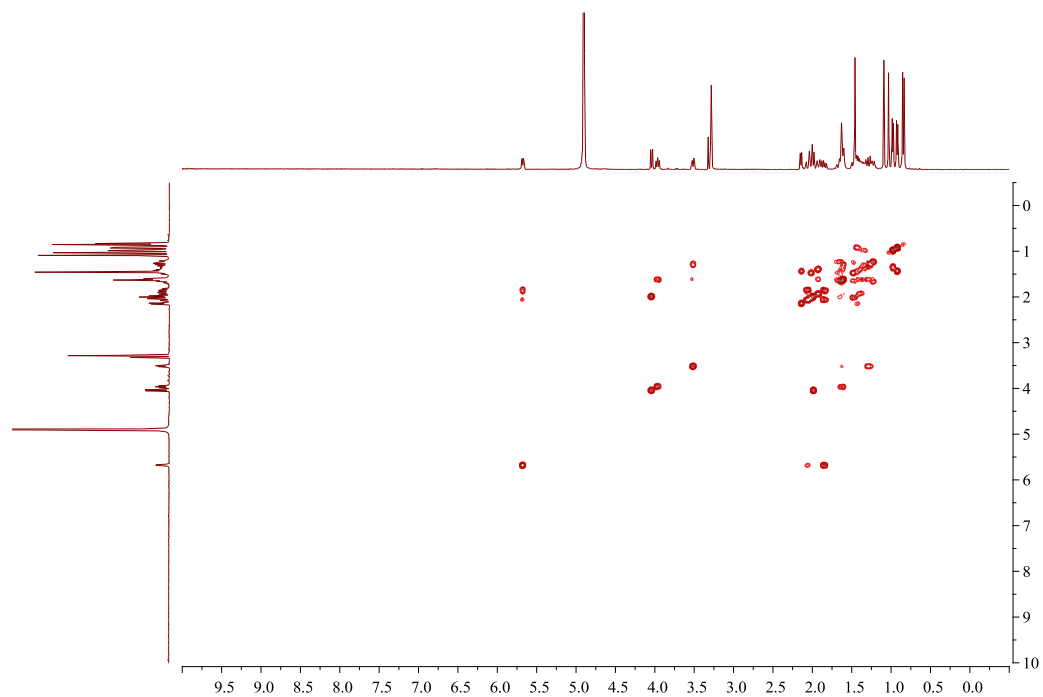

**Fig. S7.**  $^1\text{H}$ - $^1\text{H}$  COSY spectrum of compound **1**-expansion.

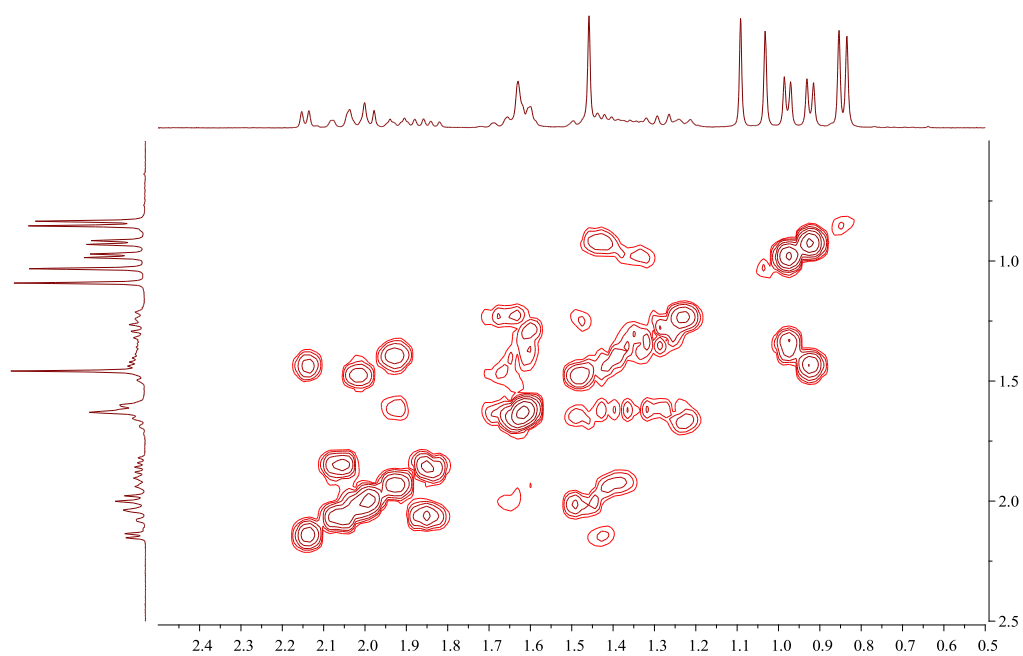

**Fig. S8.** HMBC spectrum of compound **1** in CD<sub>3</sub>OD (600 MHz).

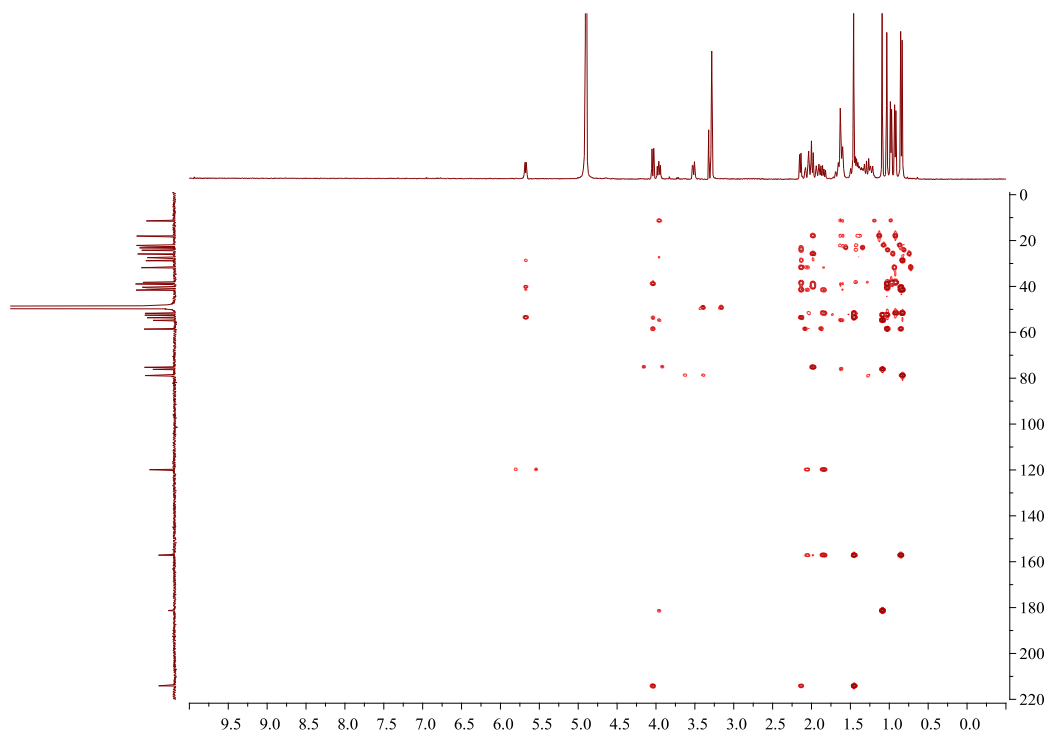

**Fig. S9.** HMBC spectrum of compound **1**-expansion.

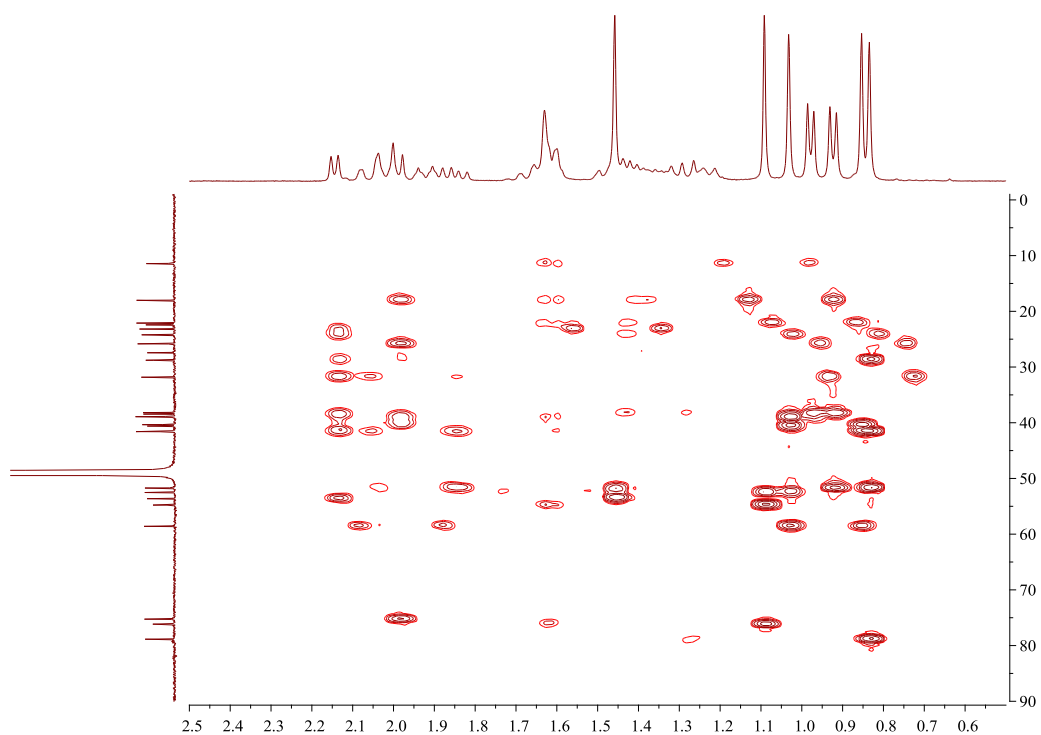

**Fig. S10.**  $^1\text{H}$  NMR spectrum of compound **1** in  $\text{C}_5\text{D}_5\text{N}$  (600 MHz).

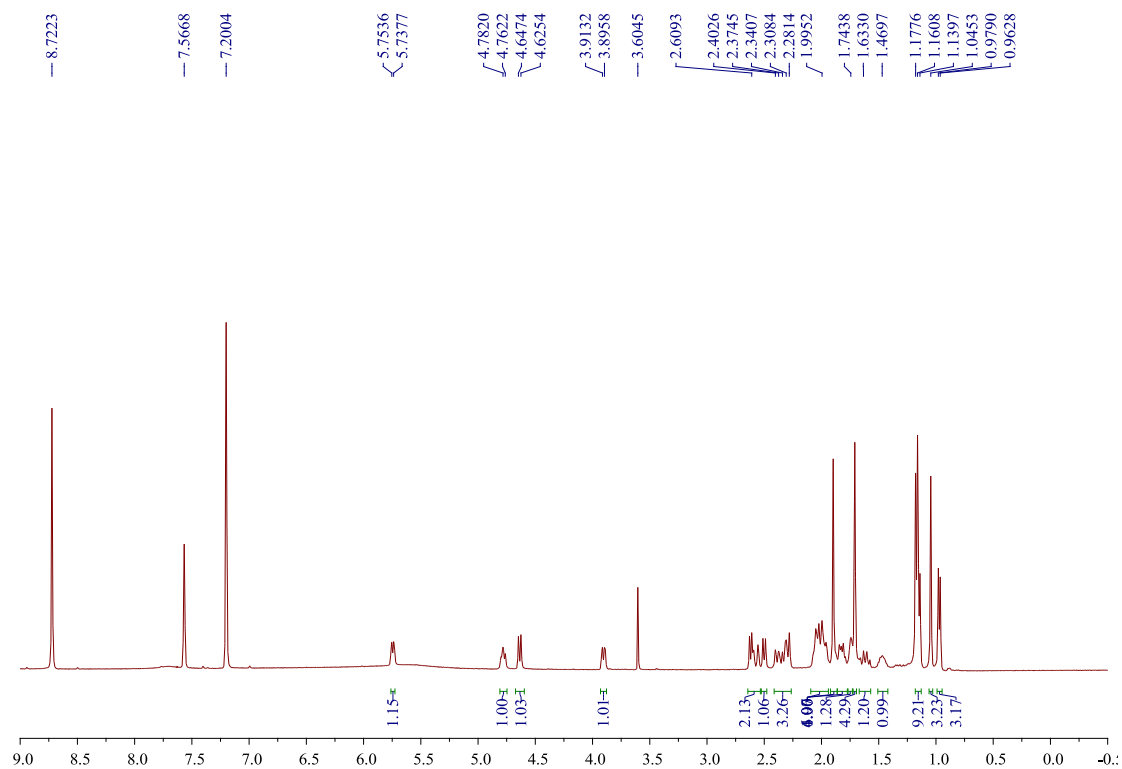

**Fig. S11.** ROESY spectrum of compound **1** in  $\text{C}_5\text{D}_5\text{N}$  (600 MHz).

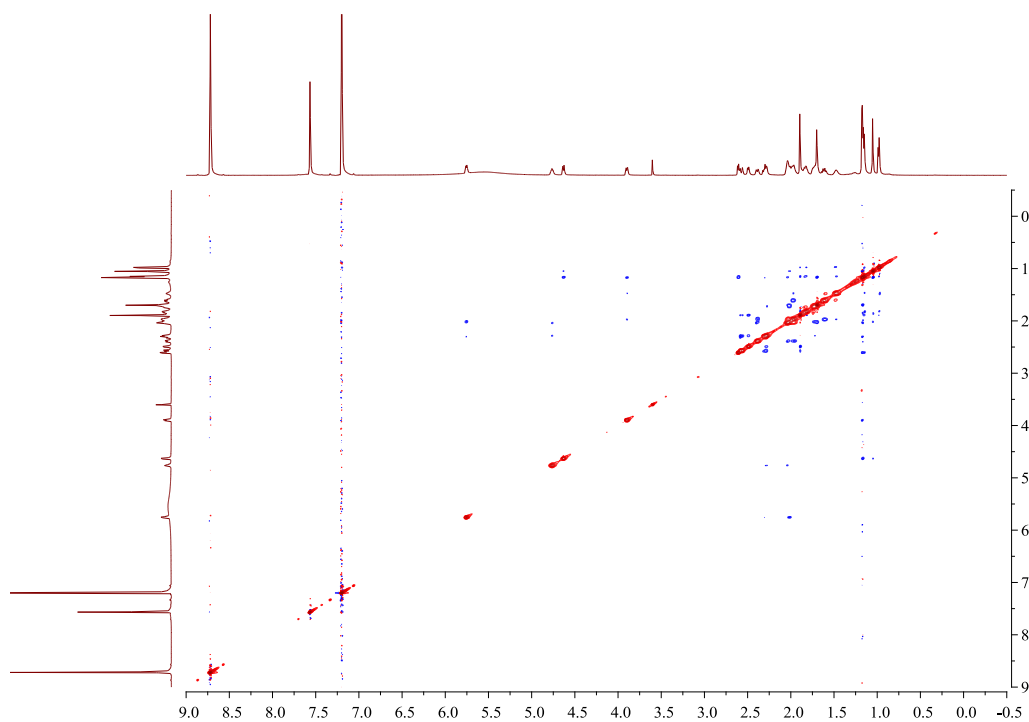



**Fig. S12.** ROESY spectrum of compound 1—expansion.

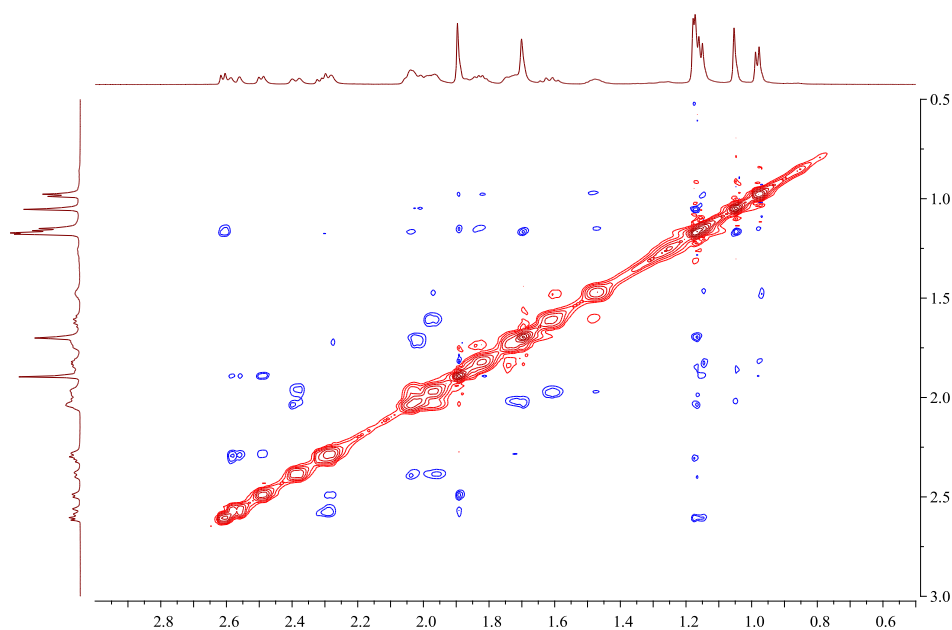

**Fig. S13.** HRESIMS report of compound 1.

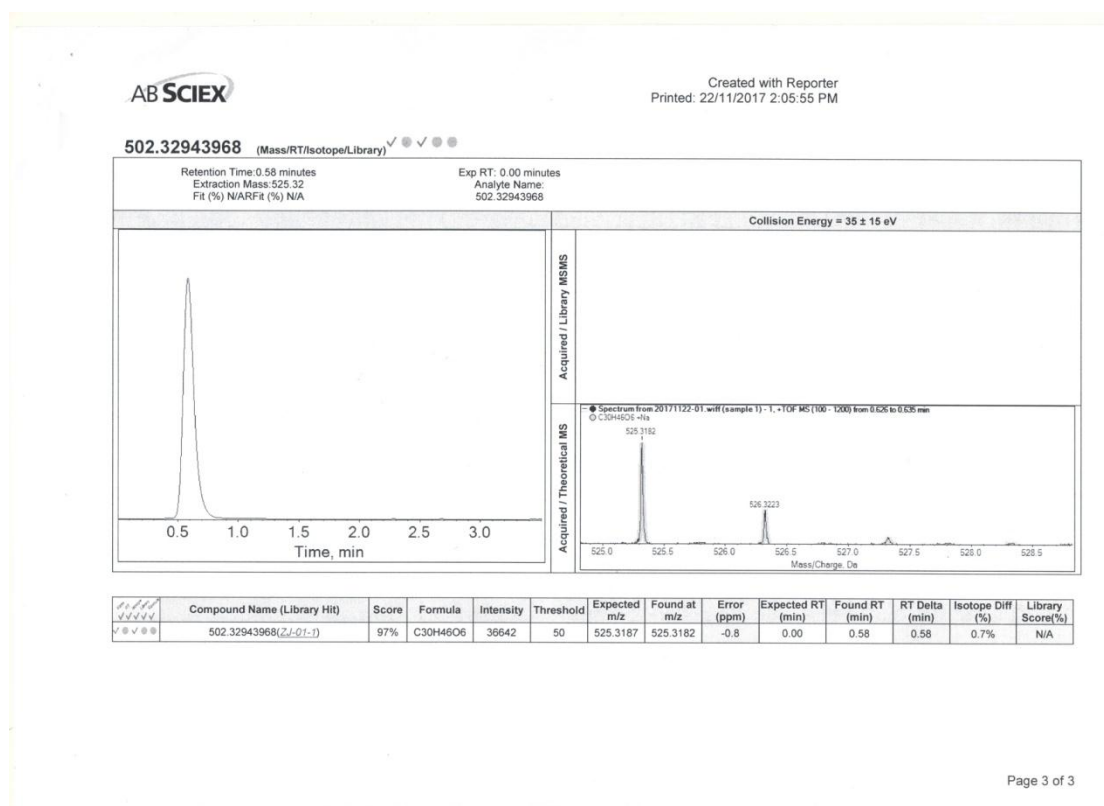



**Fig. S16.**  $^{13}\text{C}$  NMR spectrum of compound **2** in  $\text{C}_5\text{D}_5\text{N}$  (150 MHz).

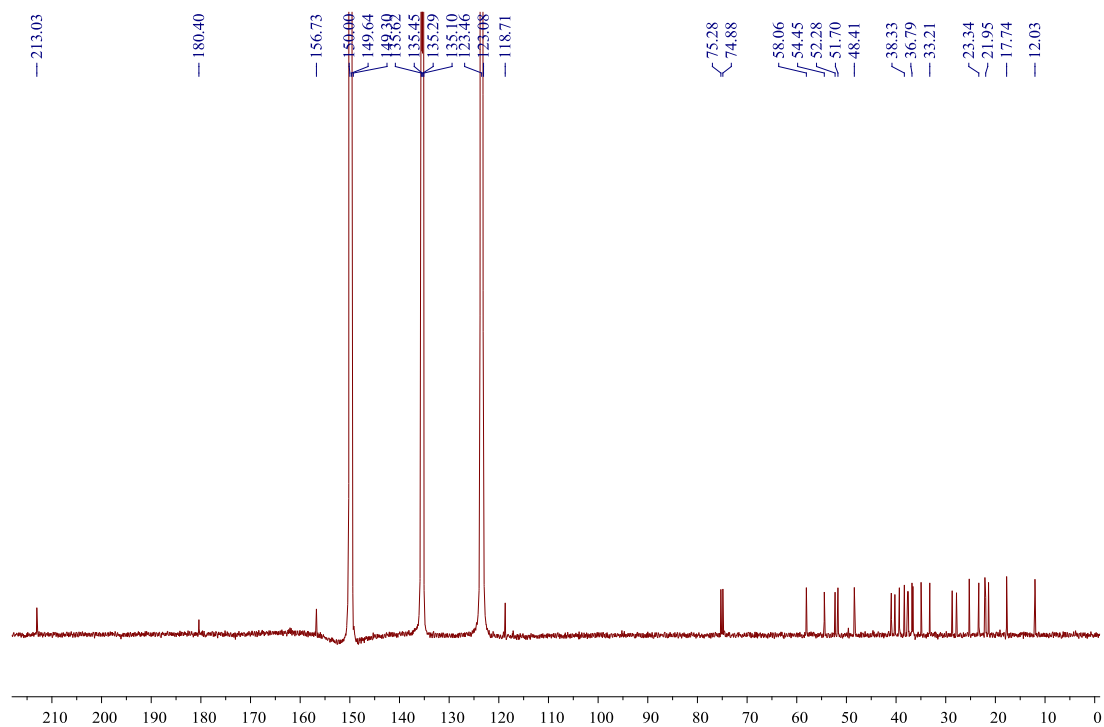

**Fig. S17.**  $^{13}\text{C}$  NMR spectrum of compound **2** –expansion.

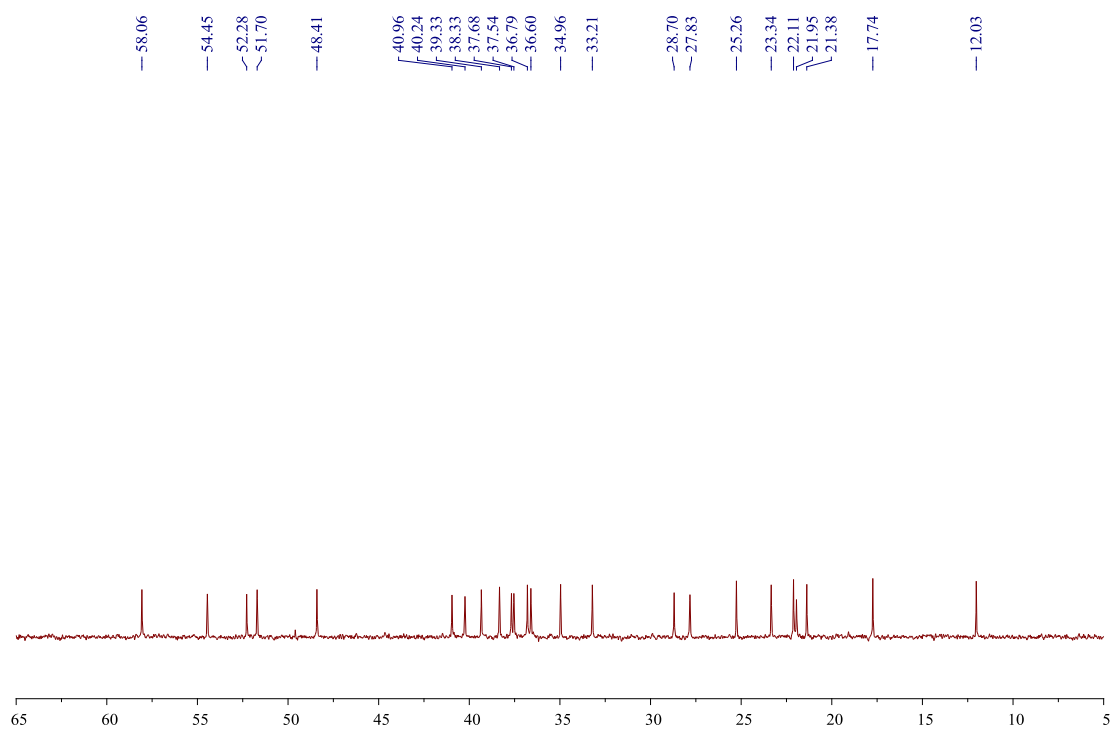

**Fig. S18.** HMBC spectrum of compound **2** in C<sub>5</sub>D<sub>5</sub>N (600 MHz).

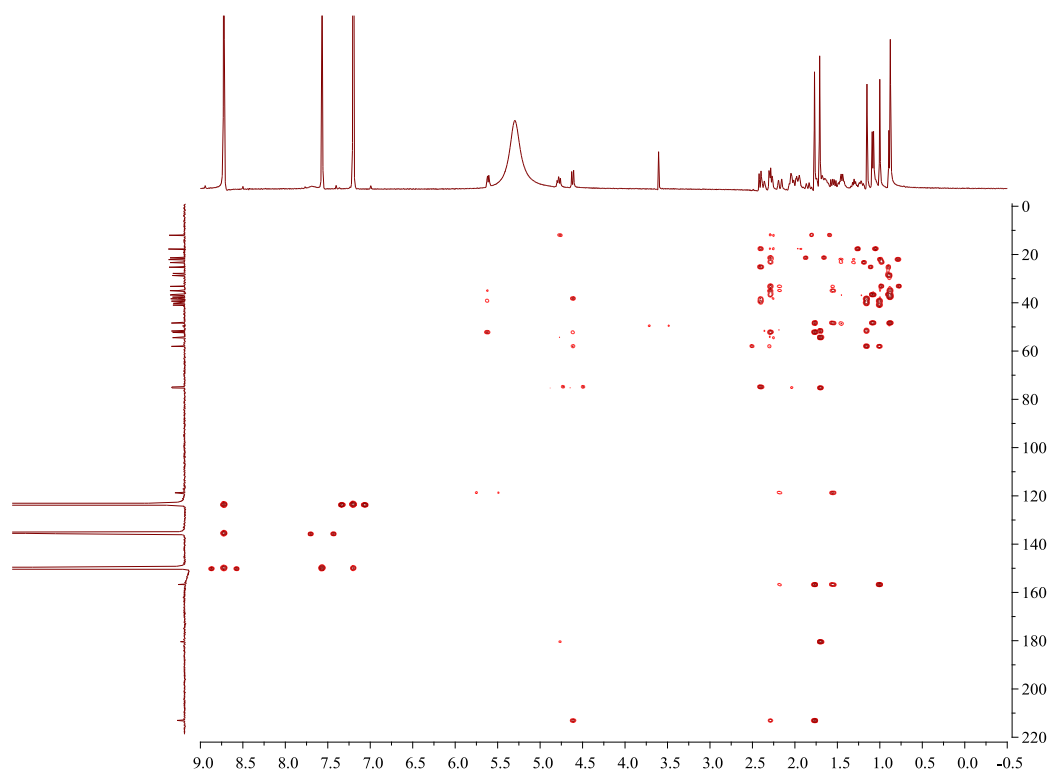

**Fig. S19.** HMBC spectrum of compound **2**-expansion.

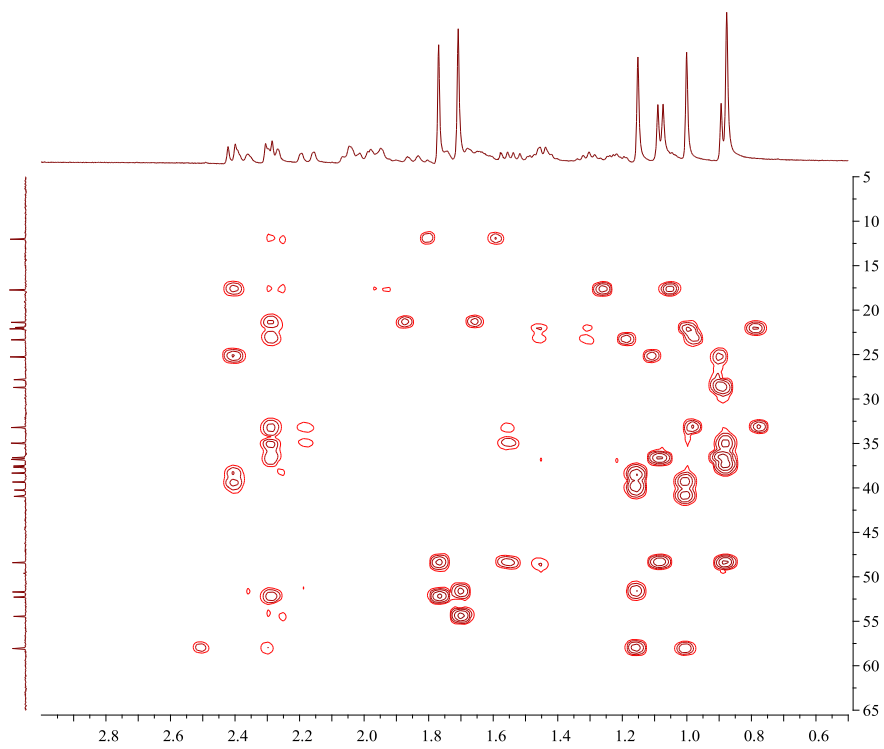

**Fig. S20.** ROESY spectrum of compound **2** in C<sub>5</sub>D<sub>5</sub>N (600 MHz).

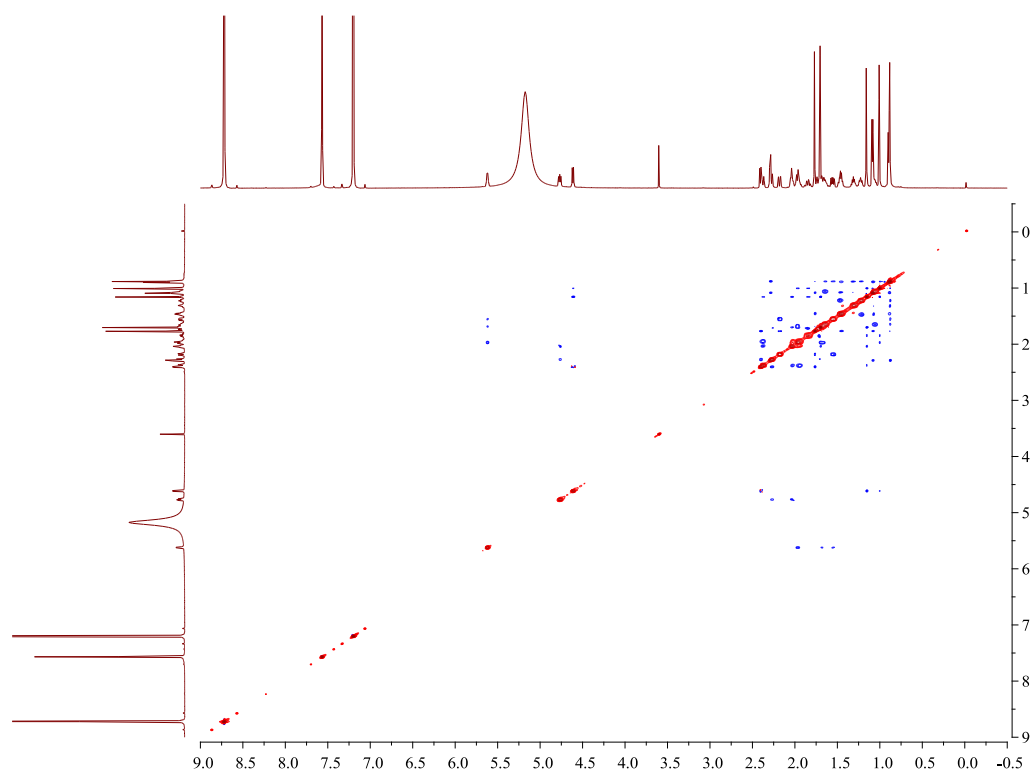

**Fig. S21.** ROESY spectrum of compound **2**-expansion.

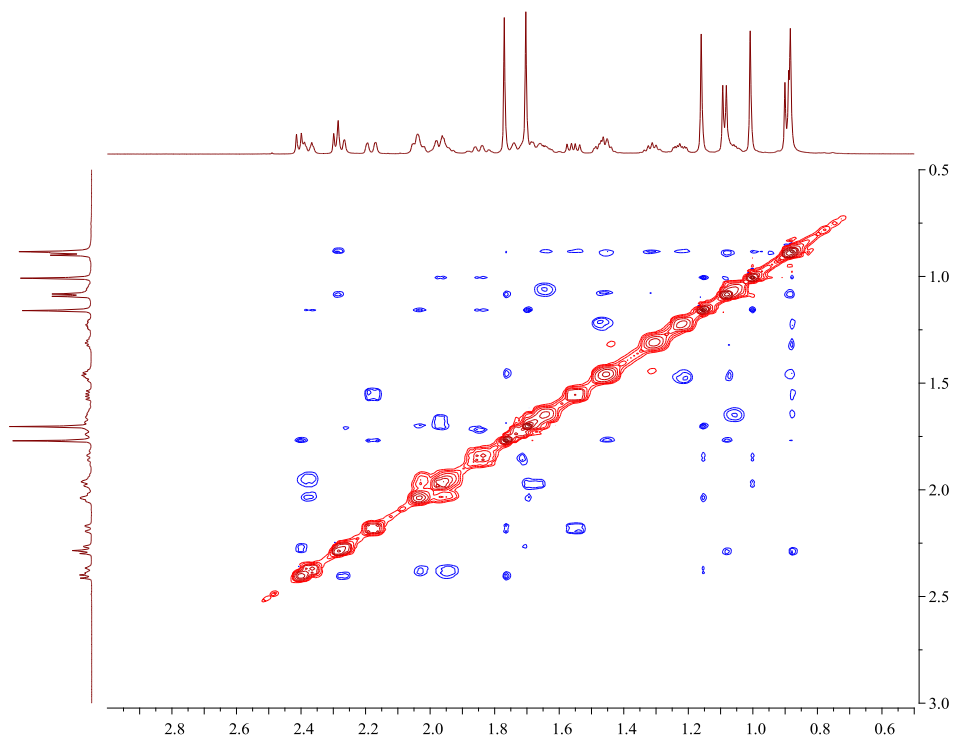

**Fig. S22.** HRESIMS report of compound **2**.

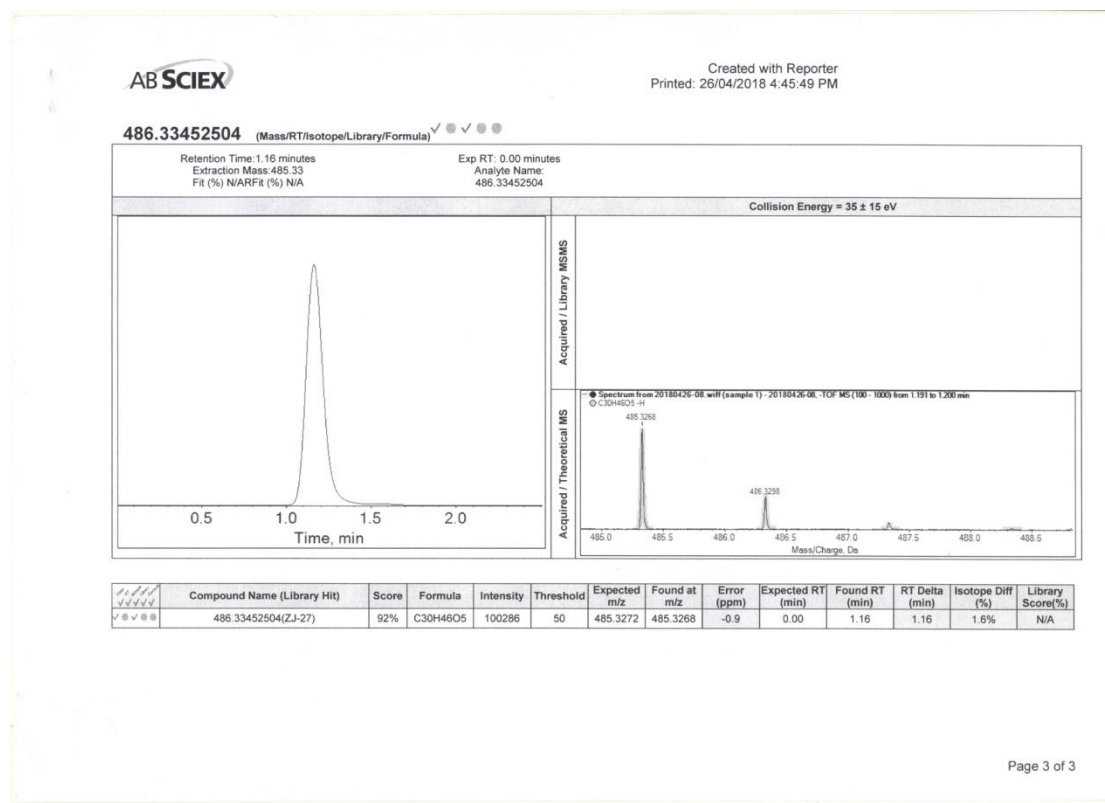

**Fig. S23.** Experimental ECD spectra of **1** (red curve) and **2** (black curve) in MeOH.

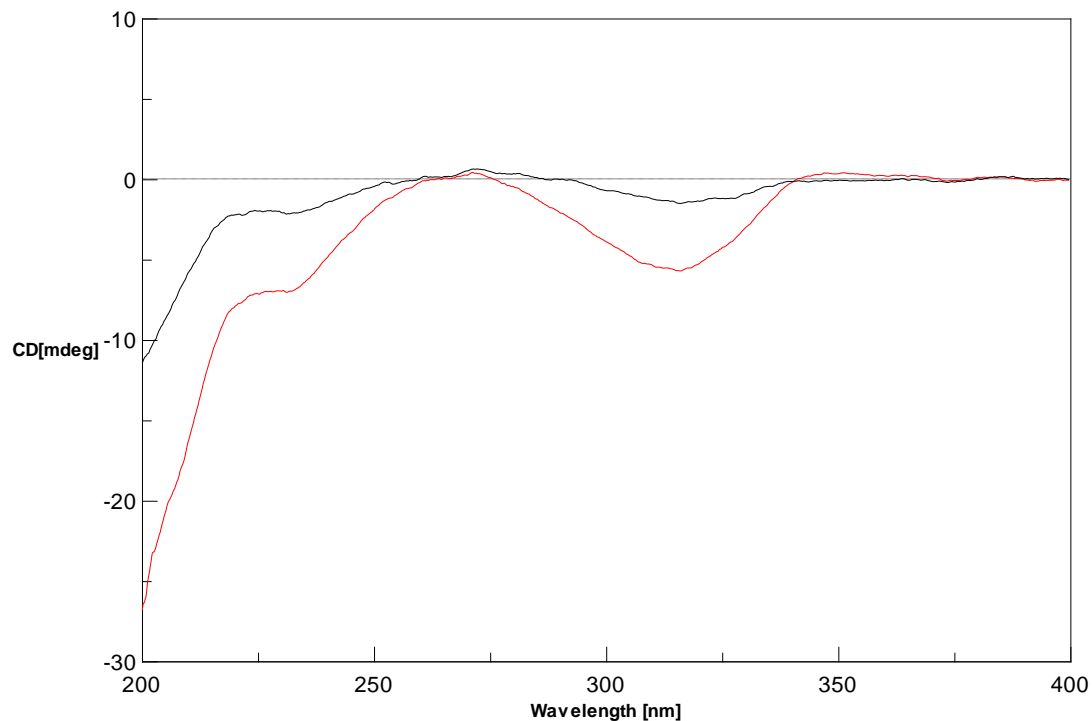

Fig. S24.  $^1\text{H}$  NMR spectrum of compound **3** in  $\text{CD}_3\text{OD}$  (400 MHz).

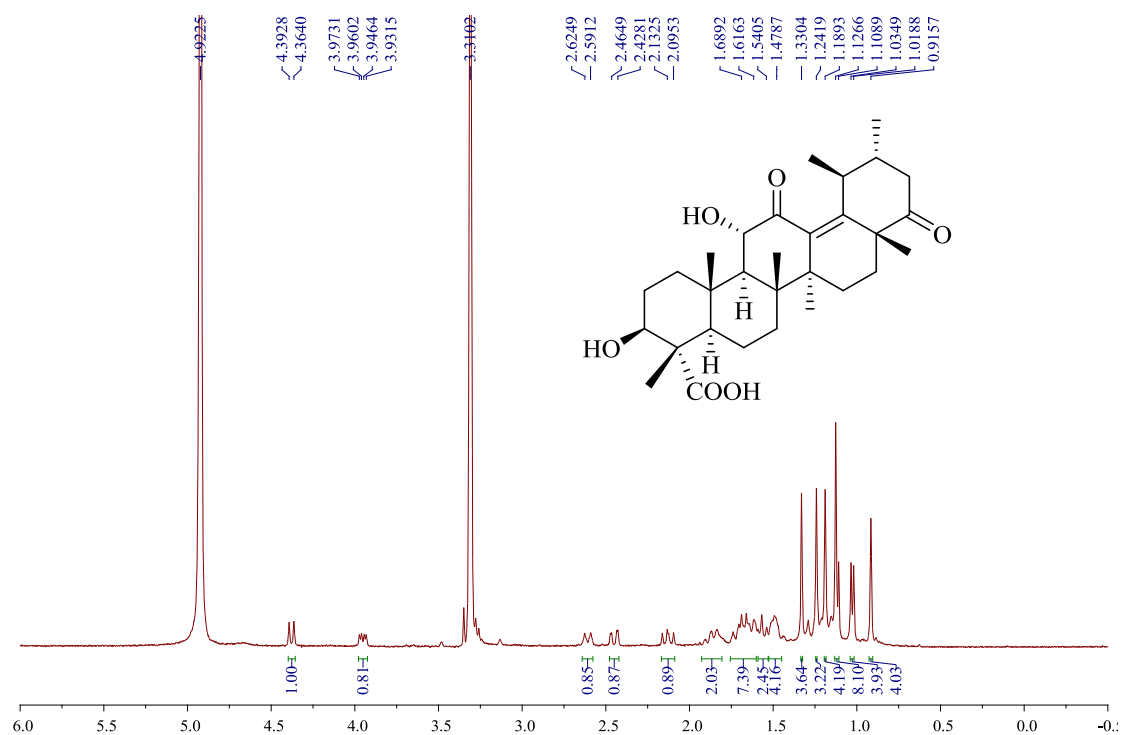

Fig. S25.  $^1\text{H}$  NMR spectrum of compound **3**—expansion.

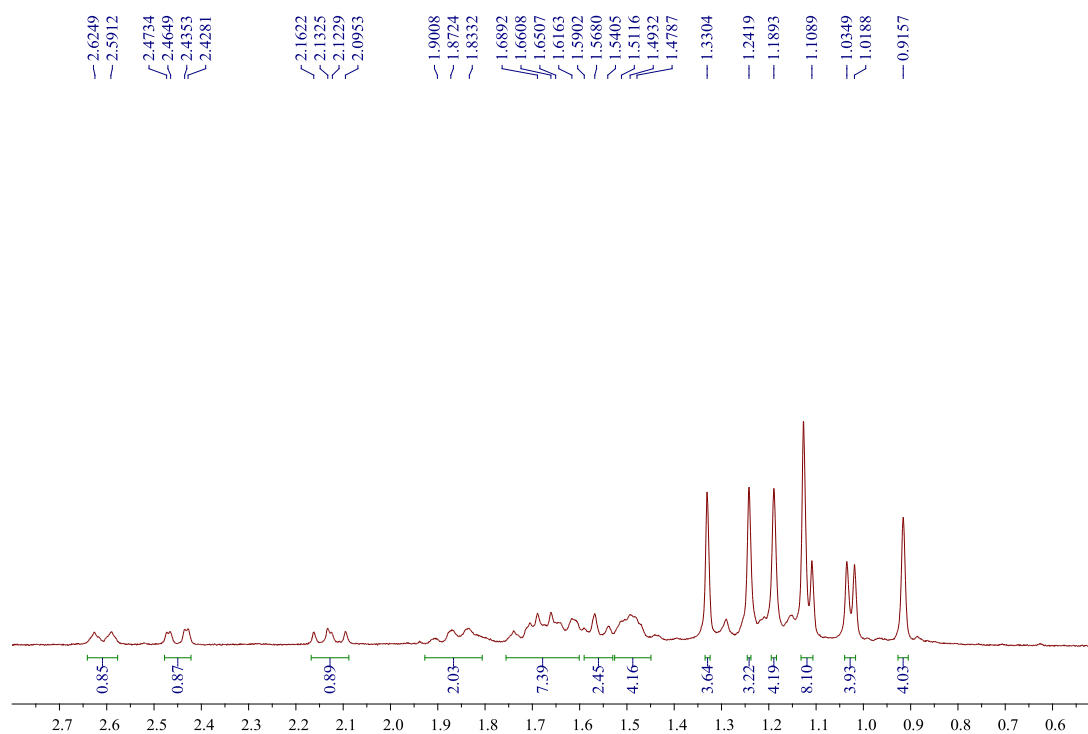

**Fig. S26.**  $^{13}\text{C}$  NMR spectrum of compound **3** in  $\text{CD}_3\text{OD}$  (150 MHz).

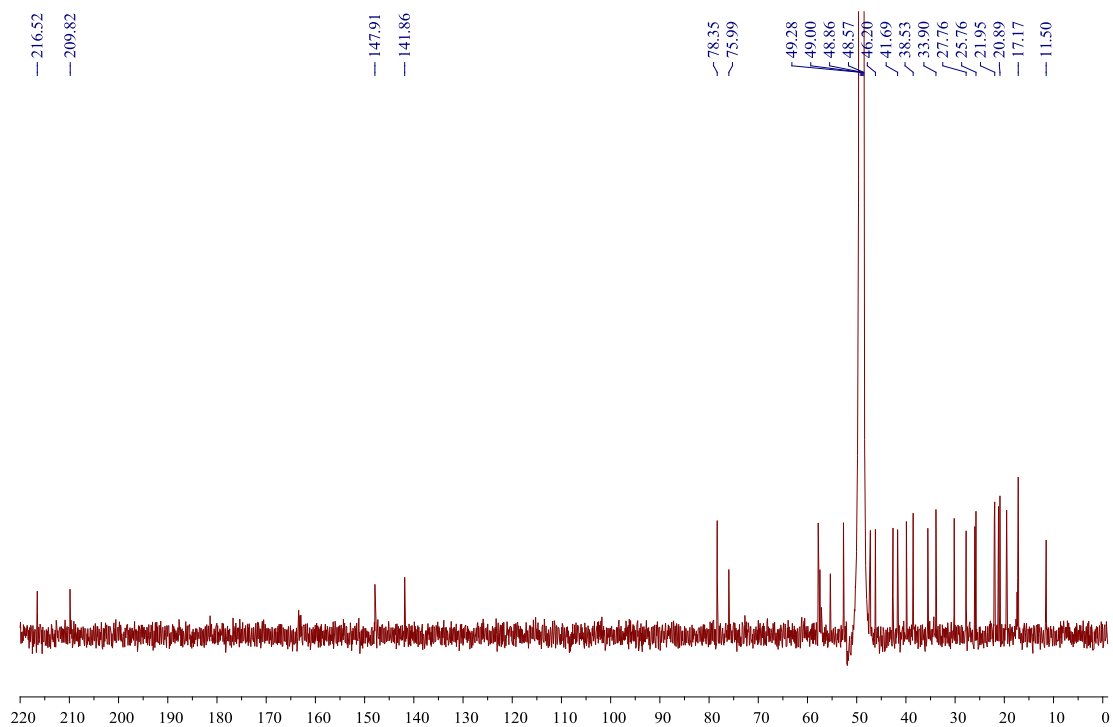

**Fig. S27.**  $^{13}\text{C}$  NMR spectrum of compound **3**-expansion. The x-axis ranges from 65 to 10 ppm. The spectrum shows a very sharp, intense peak at approximately 49 ppm, with several smaller peaks in the 10-50 ppm range. A list of chemical shifts is provided above the spectrum.

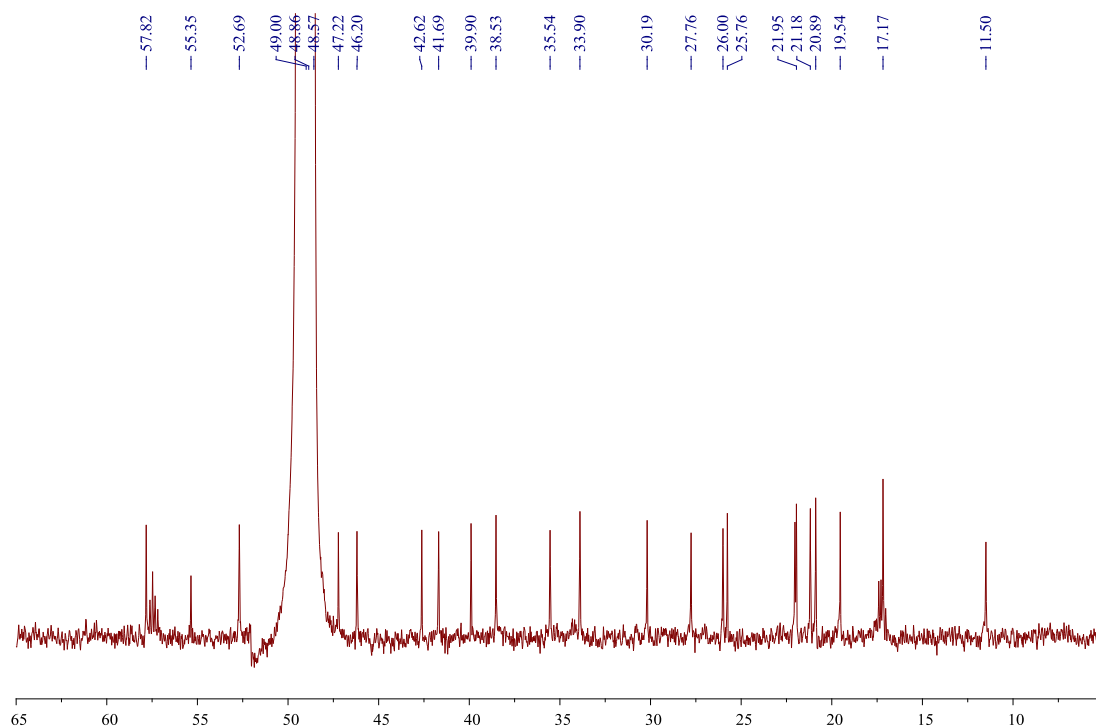



**Fig. S28.** HMBC spectrum of compound **3** in CD<sub>3</sub>OD (600 MHz).

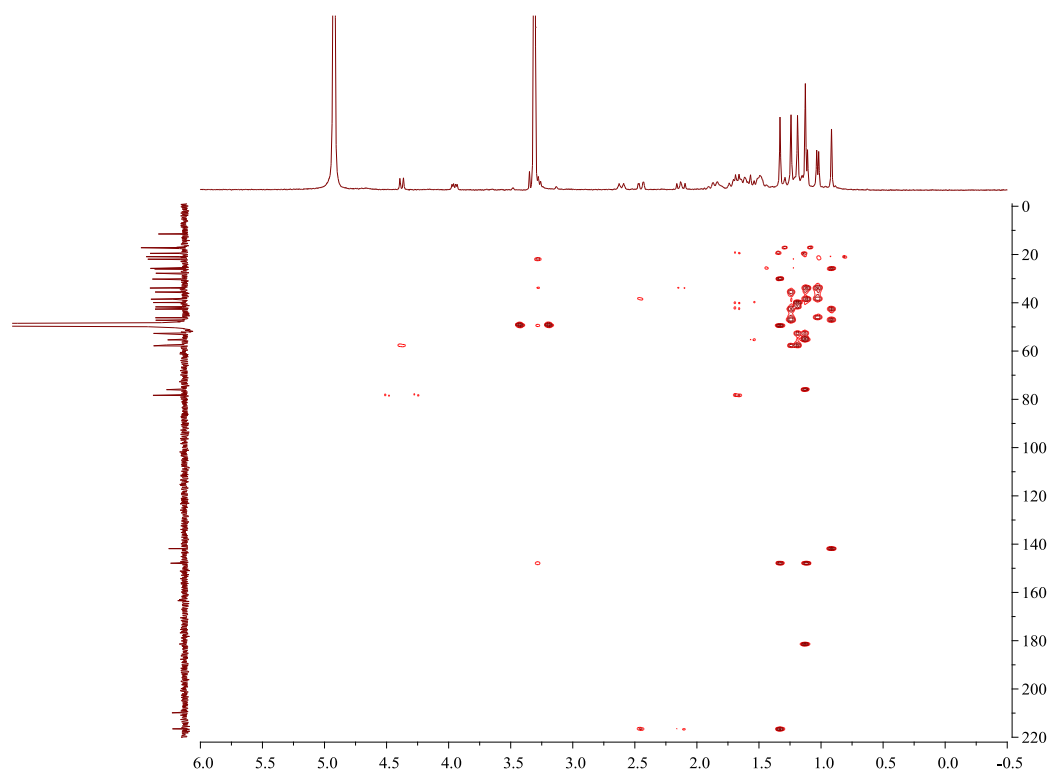

**Fig. S29.** HMBC spectrum of compound **3**—expansion.

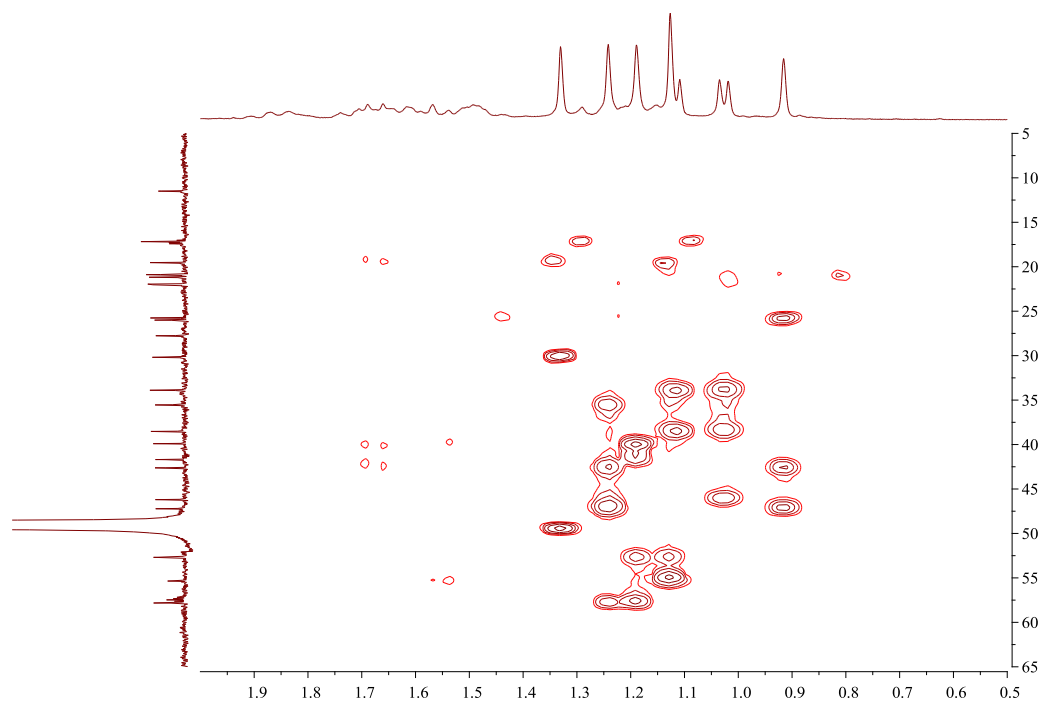

**Fig. S30.** ROESY spectrum of compound **3** in CD<sub>3</sub>OD (600 MHz).

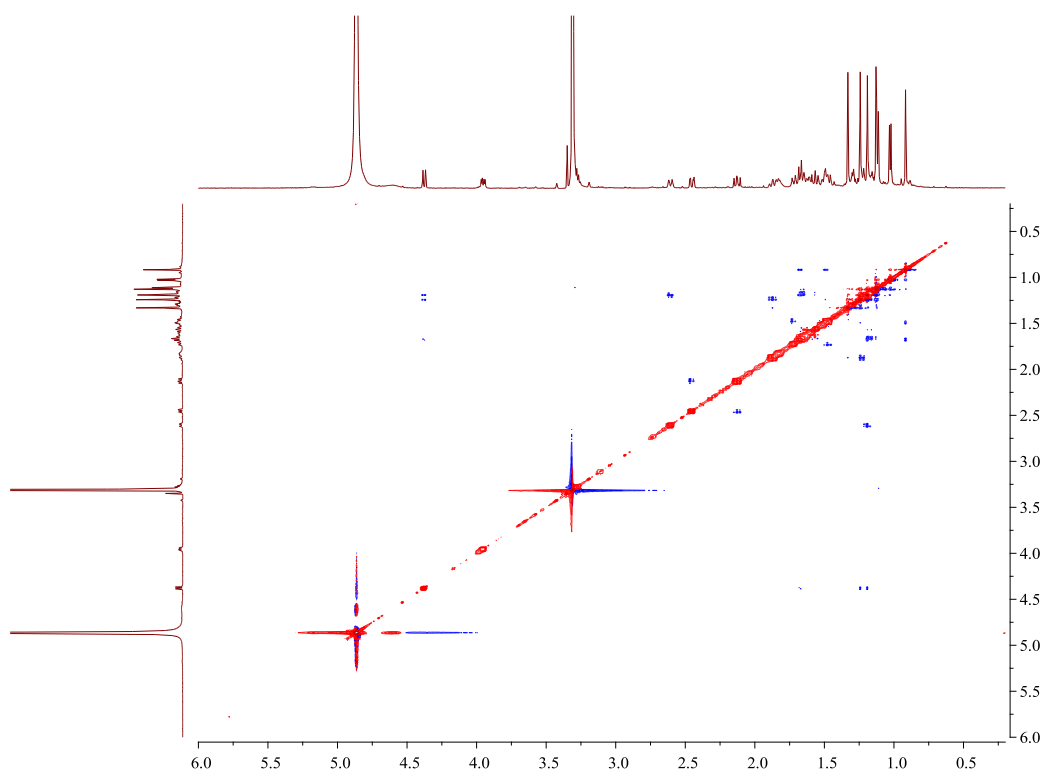

**Fig. S31.** HRESIMS report of compound **3**.

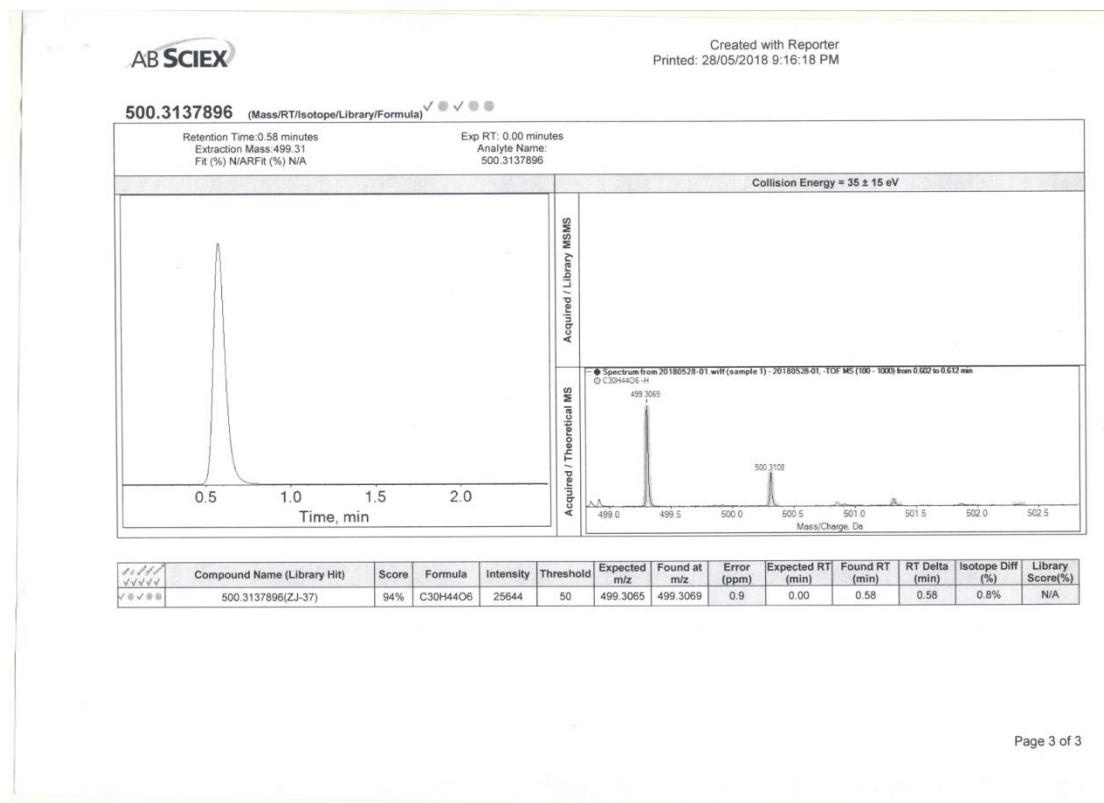

**Fig. S32.** Experimental ECD spectrum of **3** in MeOH.

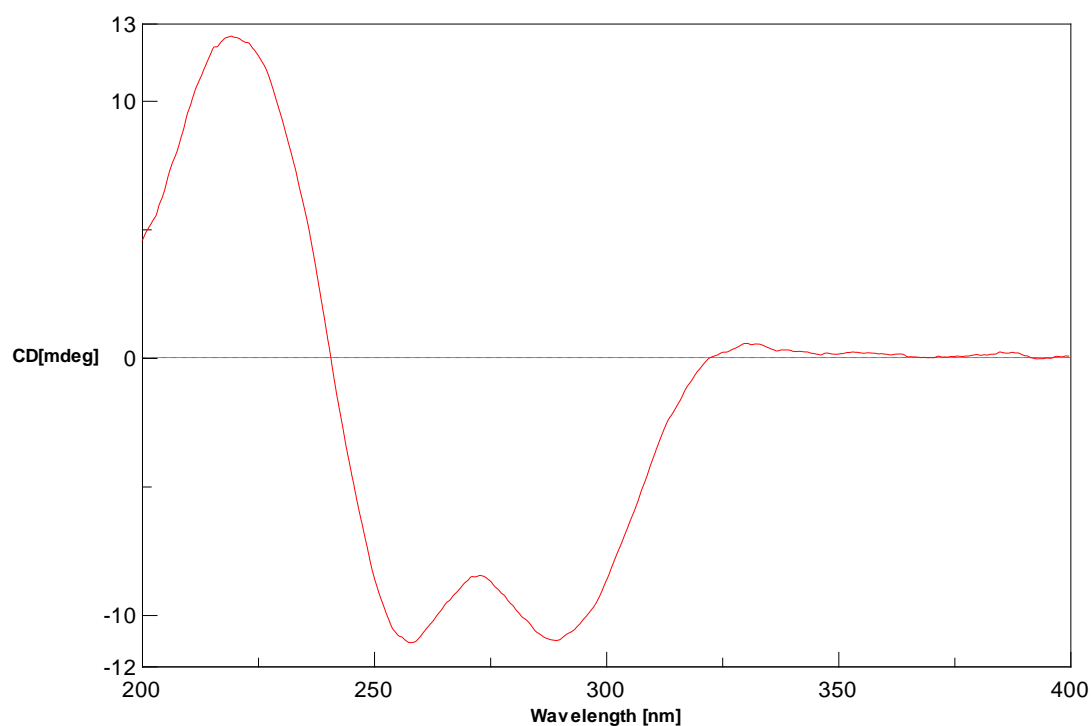

**Fig. S33.**  $^1\text{H}$  NMR spectrum of compound **4** in  $\text{C}_5\text{D}_5\text{N}$  (400 MHz).

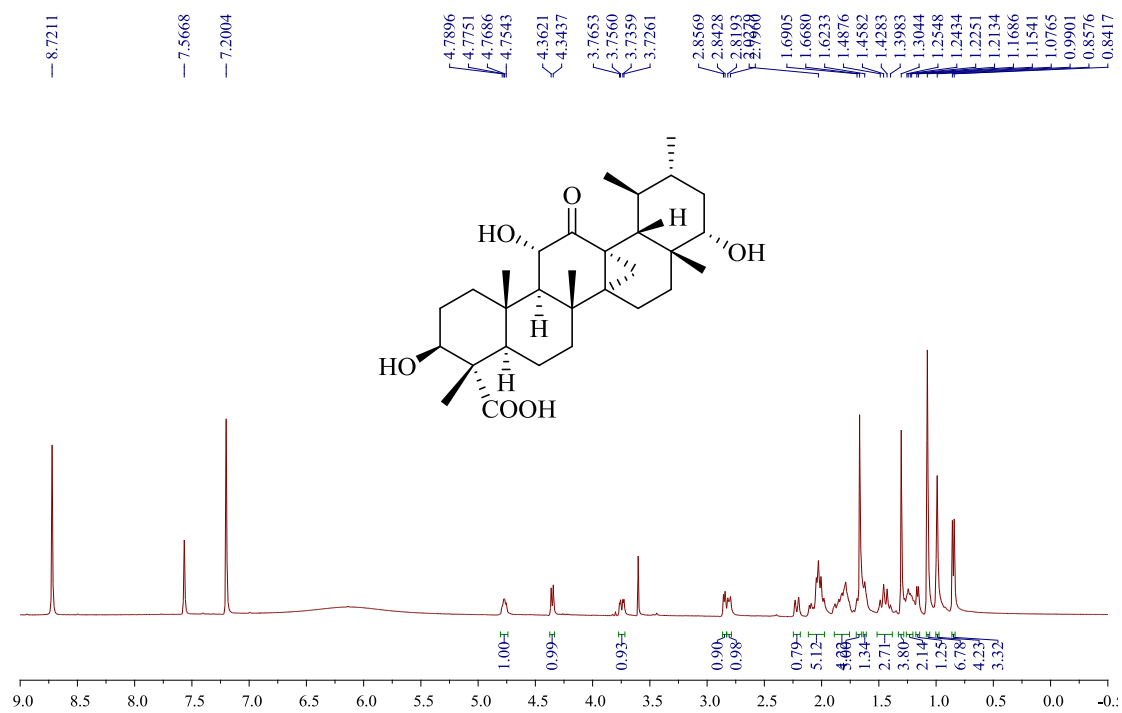

Fig. S34.  $^1\text{H}$  NMR spectrum of compound **4**-expansion.

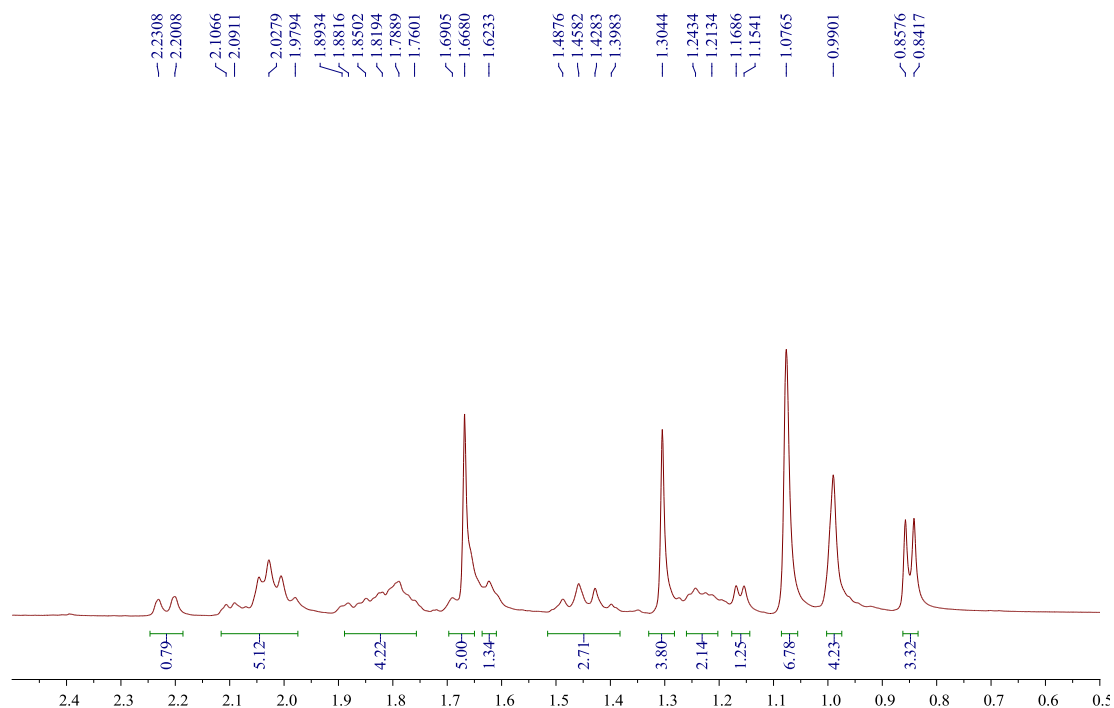

Fig. S35.  $^{13}\text{C}$  NMR spectra of compound **4** in  $\text{C}_5\text{D}_5\text{N}$  (150 MHz).

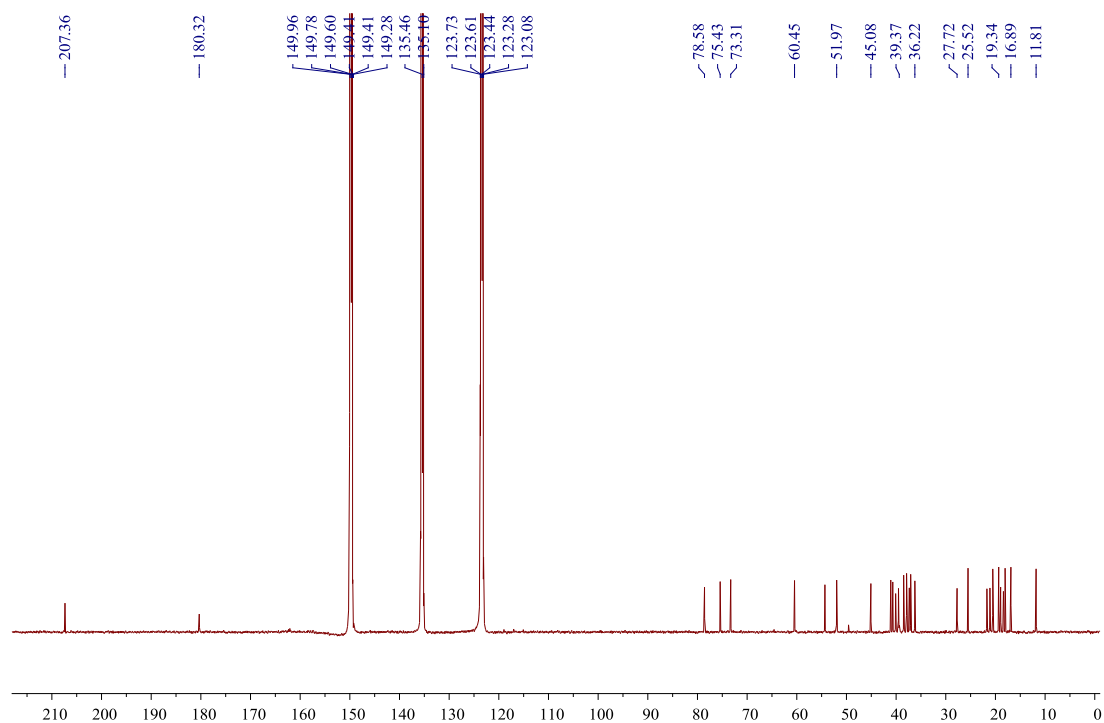

**Fig. S36.**  $^{13}\text{C}$  NMR spectra of compound **4**-expansion.

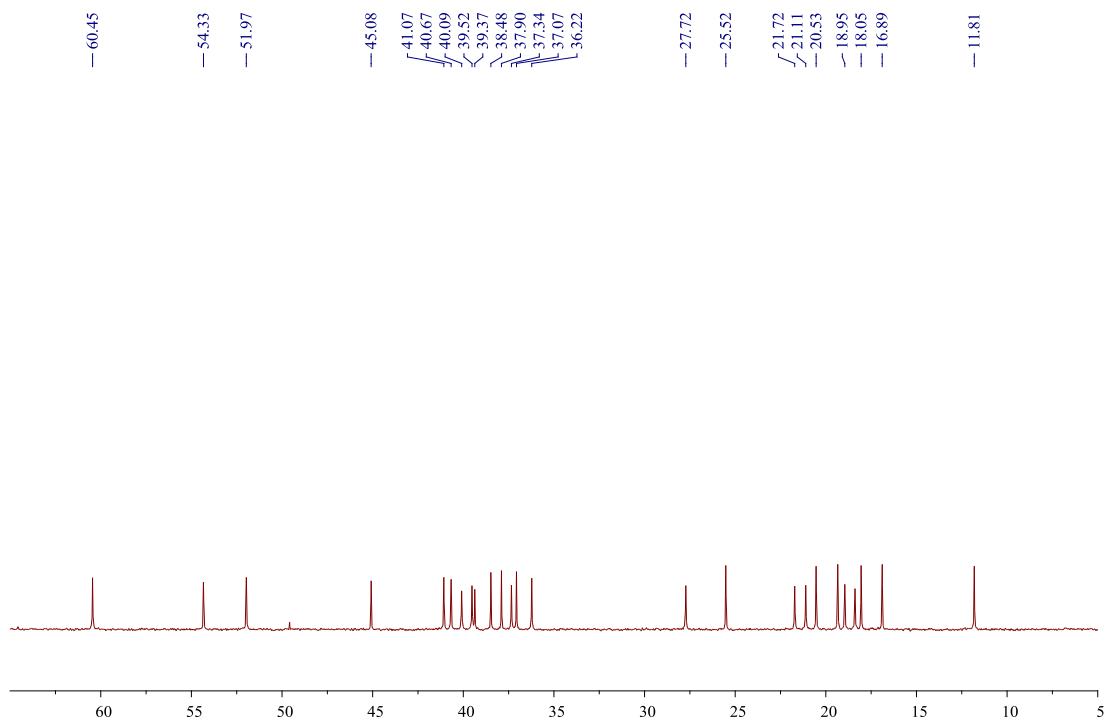

**Fig. S37.** DEPT 135 spectra of compound **4**.

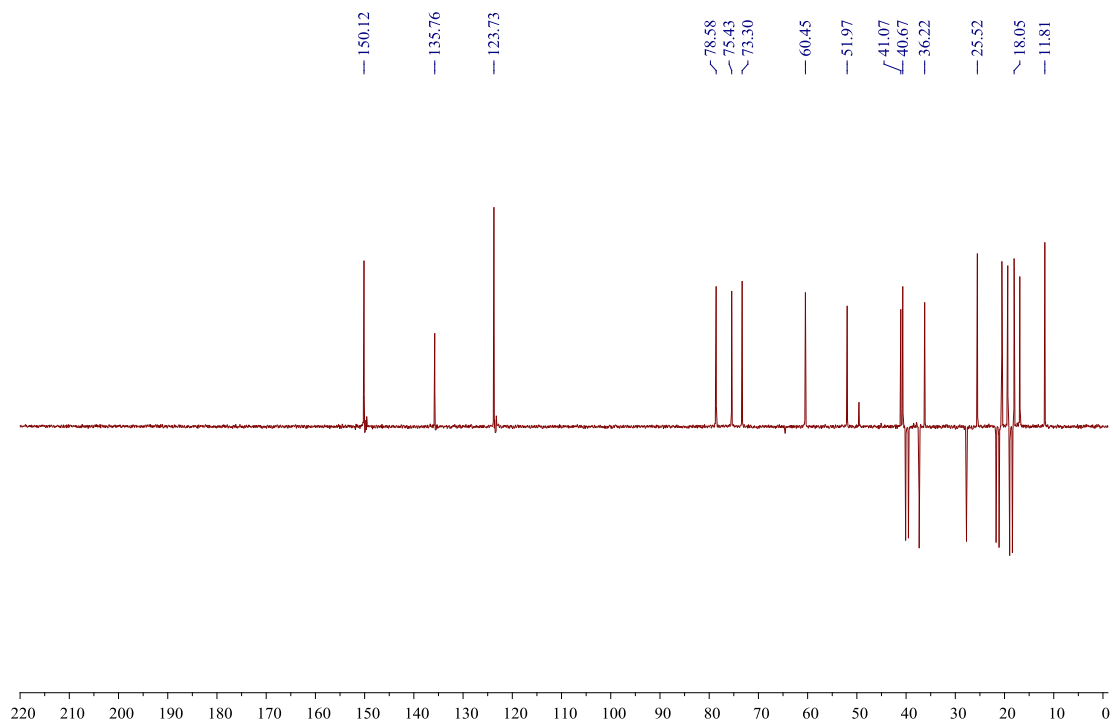

**Fig. S38.** HSQC spectrum of compound **4** in C<sub>5</sub>D<sub>5</sub>N (600 MHz).

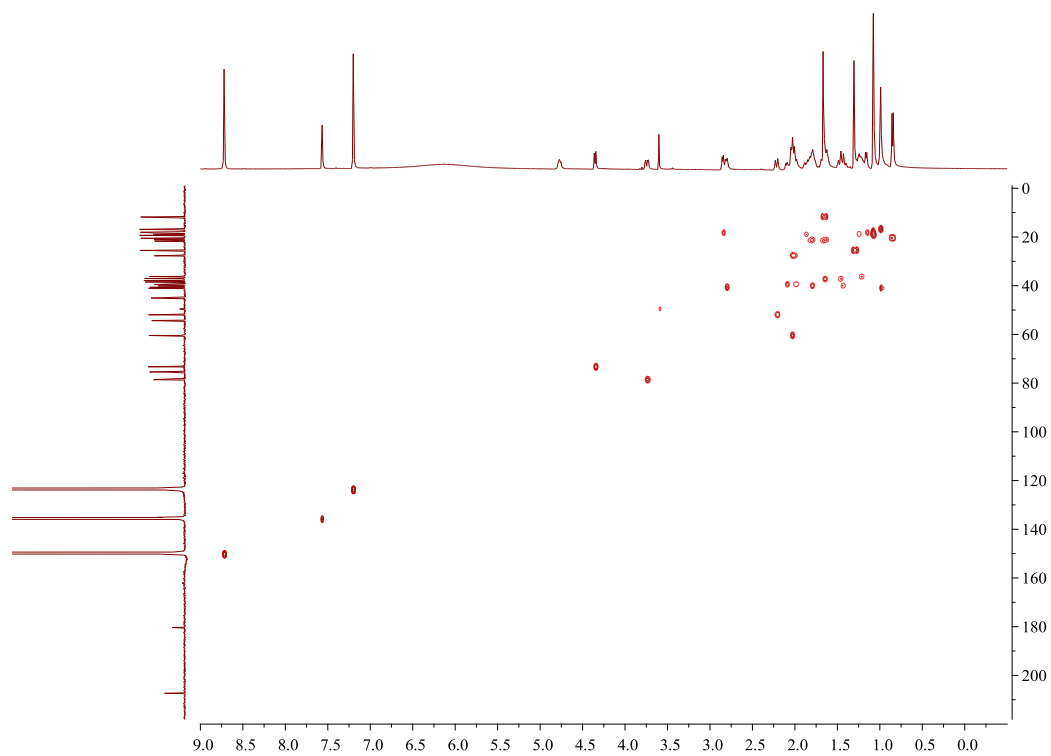

**Fig. S39.** <sup>1</sup>H-<sup>1</sup>H COSY spectrum of compound **4** in C<sub>5</sub>D<sub>5</sub>N (600 MHz).

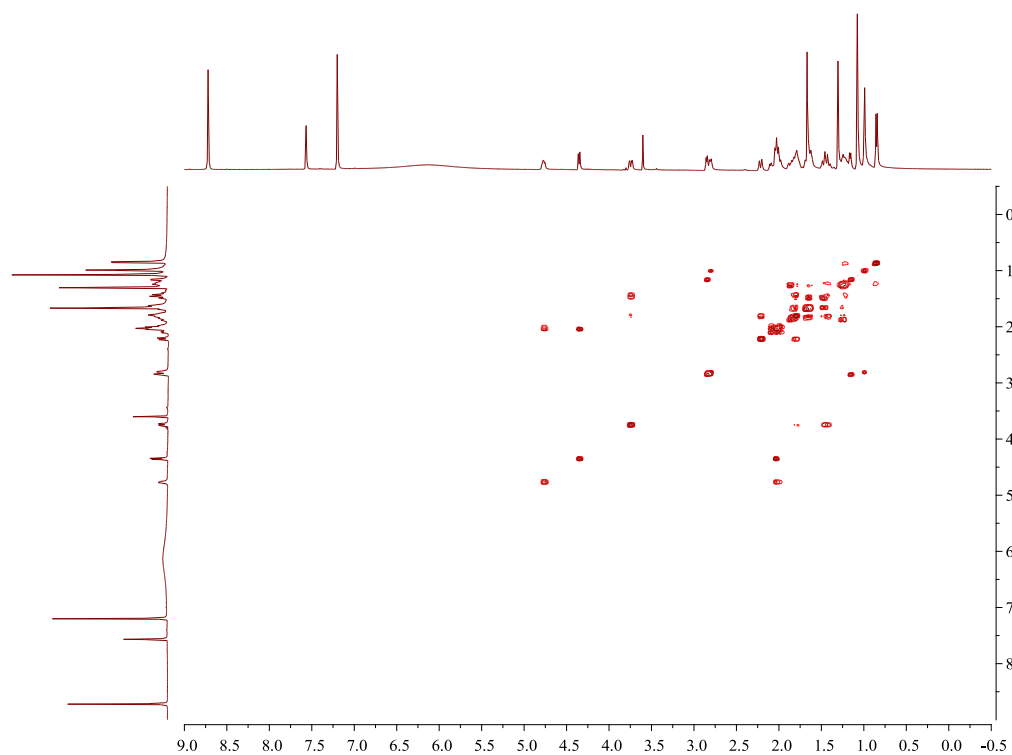

**Fig. S40.** HMBC spectrum of compound **4** in C<sub>5</sub>D<sub>5</sub>N (600 MHz).

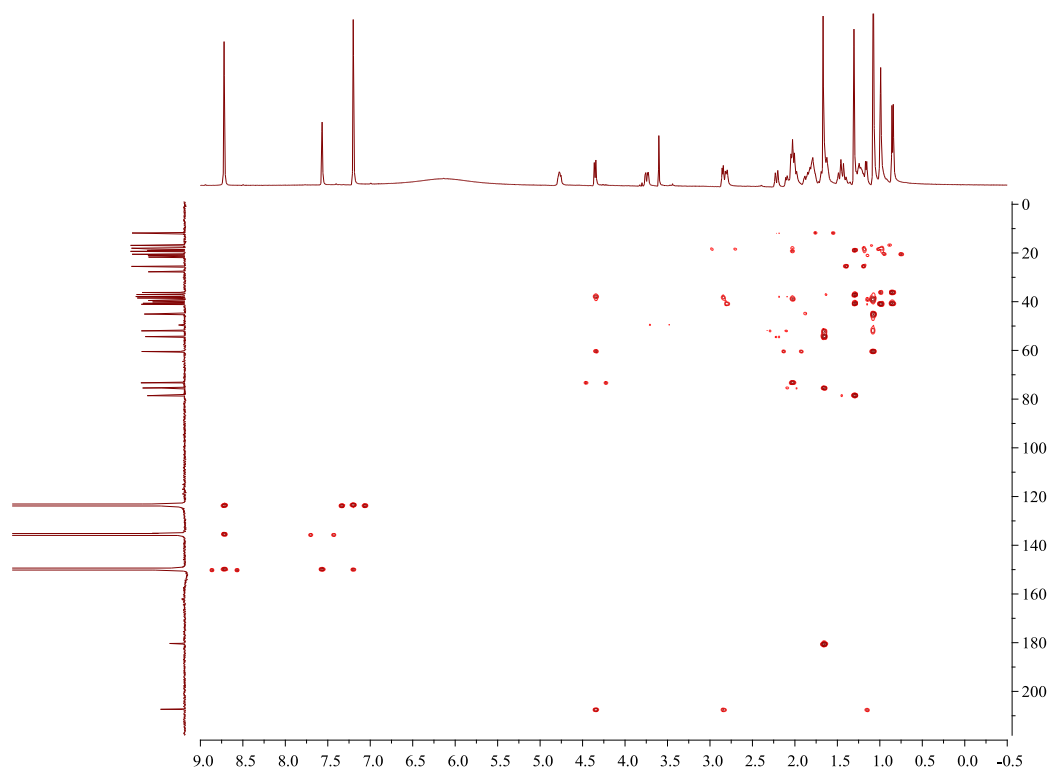

**Fig. S41.** HMBC spectrum of compound **4**-expansion.

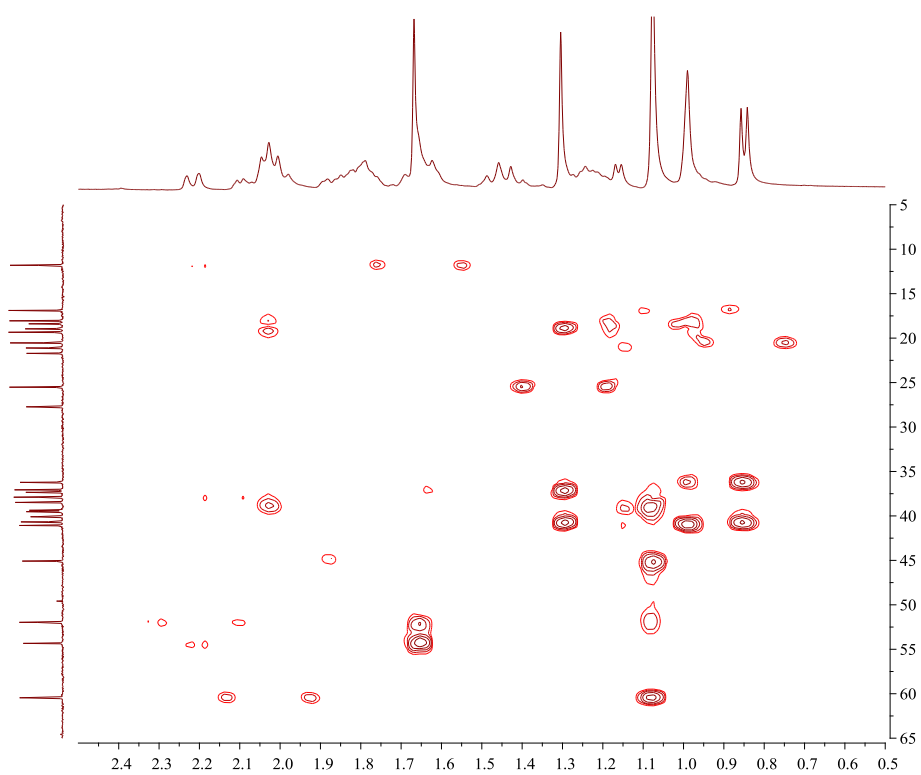

**Fig. S42.** ROESY spectrum of compound **4** in C<sub>5</sub>D<sub>5</sub>N (600 MHz).

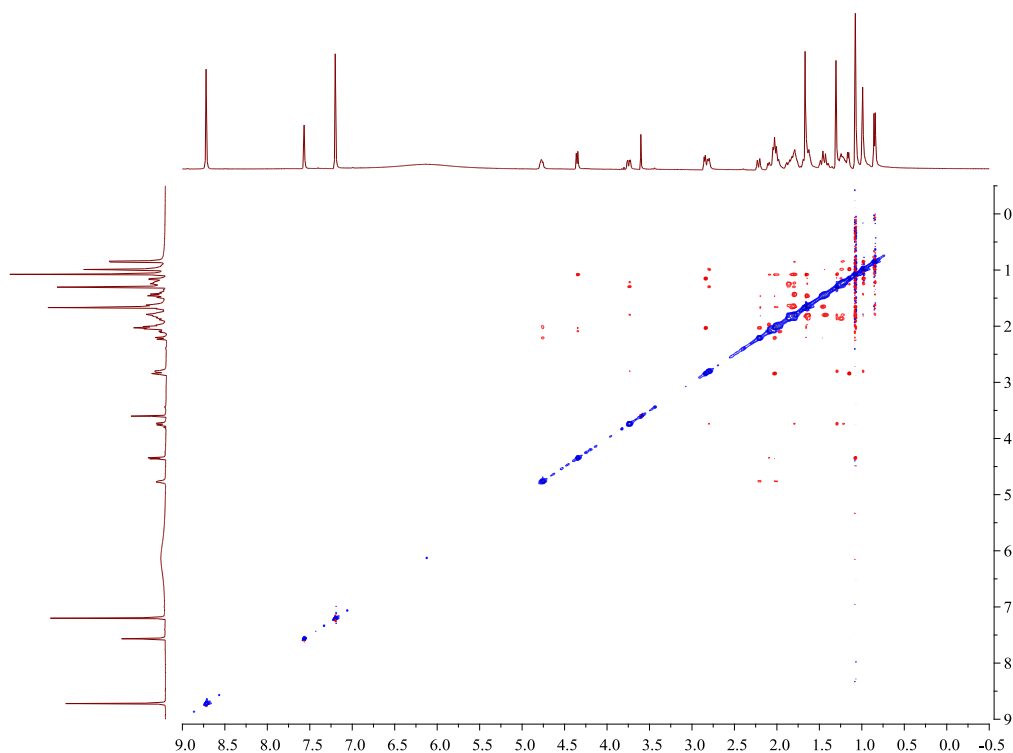

**Fig. S43.** HRESIMS report of compound **4**.

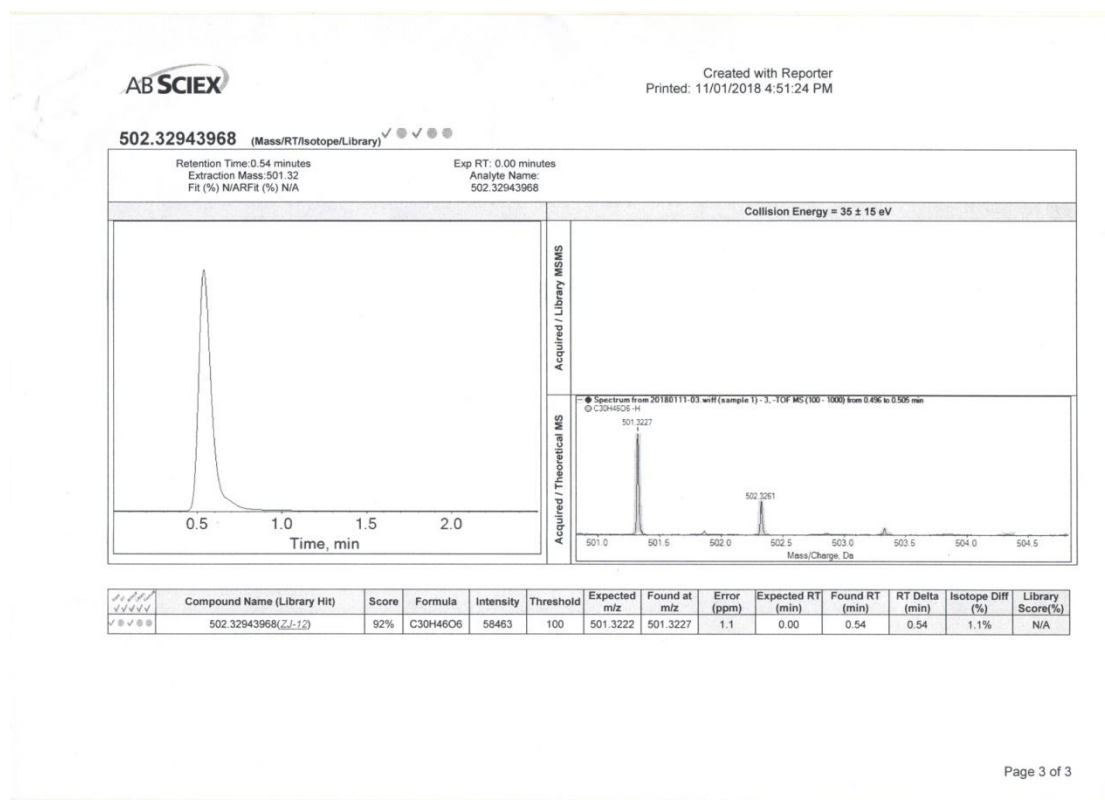



**Fig. S44.**  $^1\text{H}$  NMR spectrum of compound **5** in  $\text{C}_5\text{D}_5\text{N}$  (400 MHz).

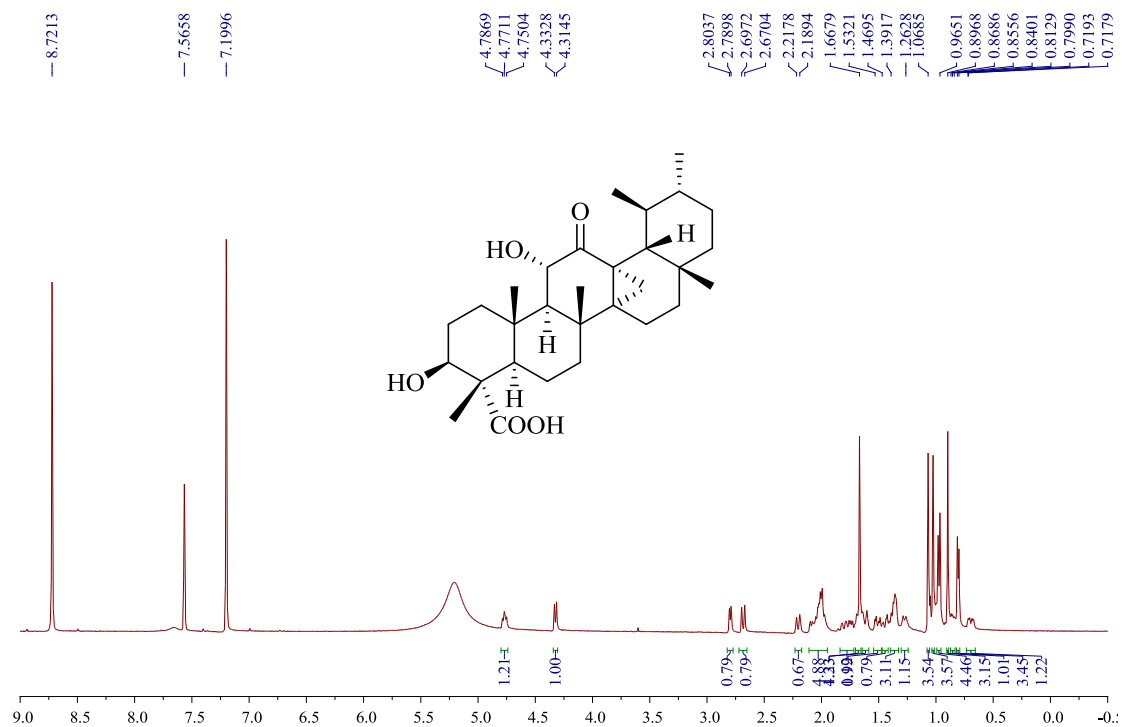

**Fig. S45.**  $^1\text{H}$  NMR spectrum of compound **5**—expansion.

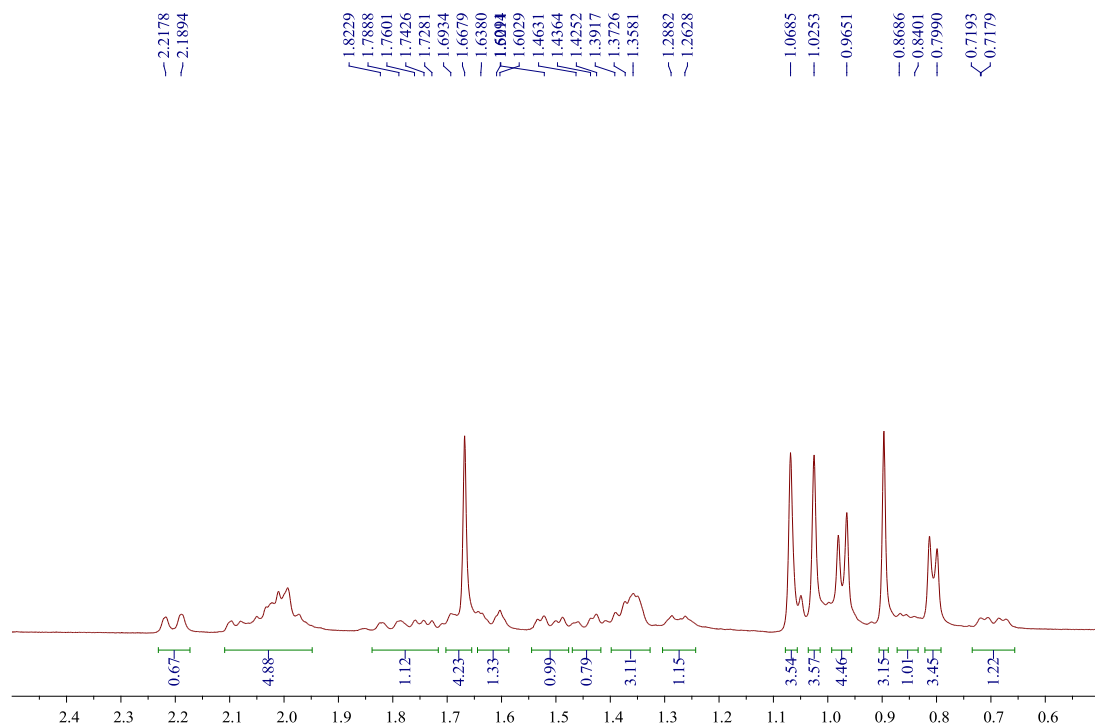

**Fig. S46.**  $^{13}\text{C}$  NMR spectrum of compound **5** in  $\text{C}_5\text{D}_5\text{N}$  (150 MHz).

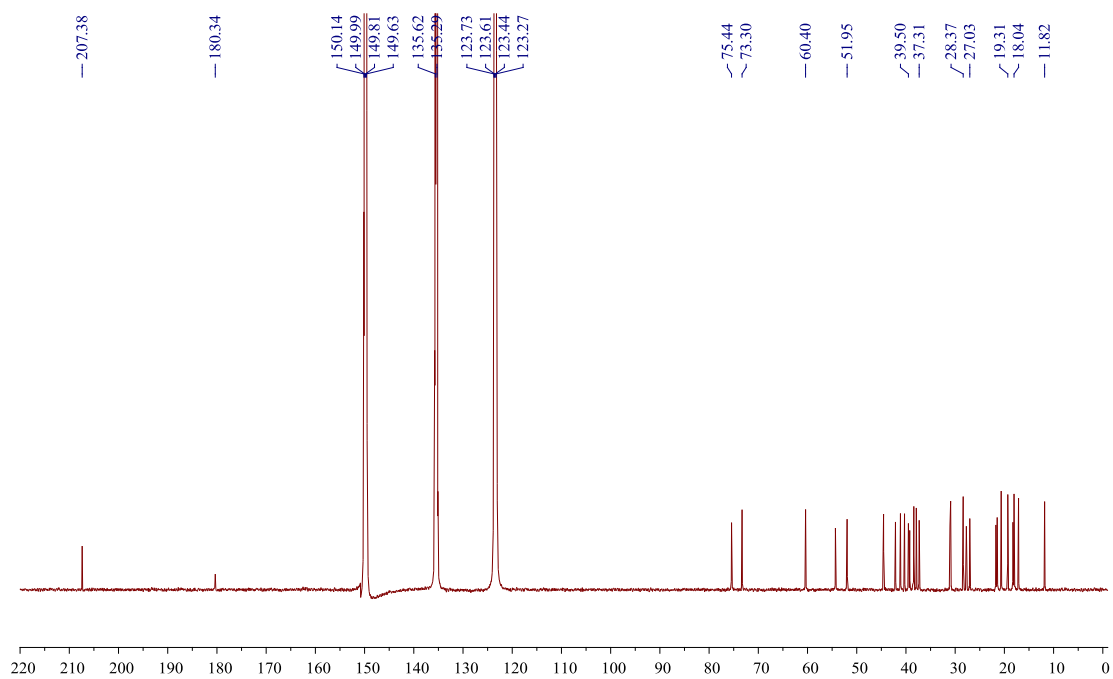

**Fig. S47.**  $^{13}\text{C}$  NMR spectrum of compound **5**—expansion.

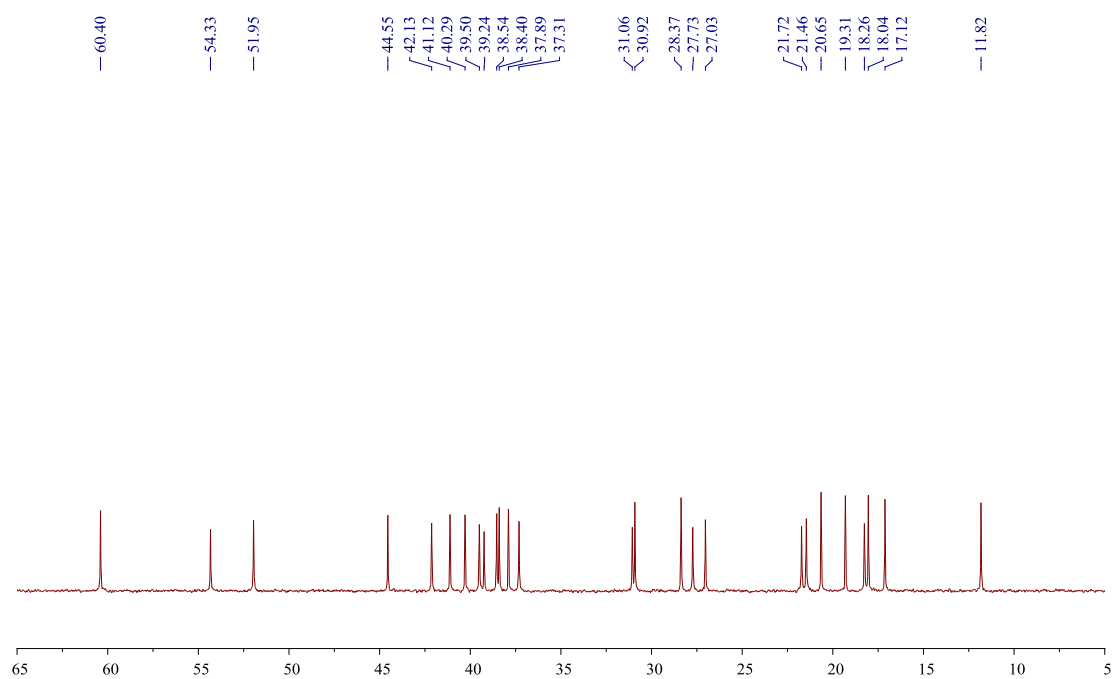

**Fig. S48.** HMBC spectrum of compound **5** in C<sub>5</sub>D<sub>5</sub>N (600 MHz).

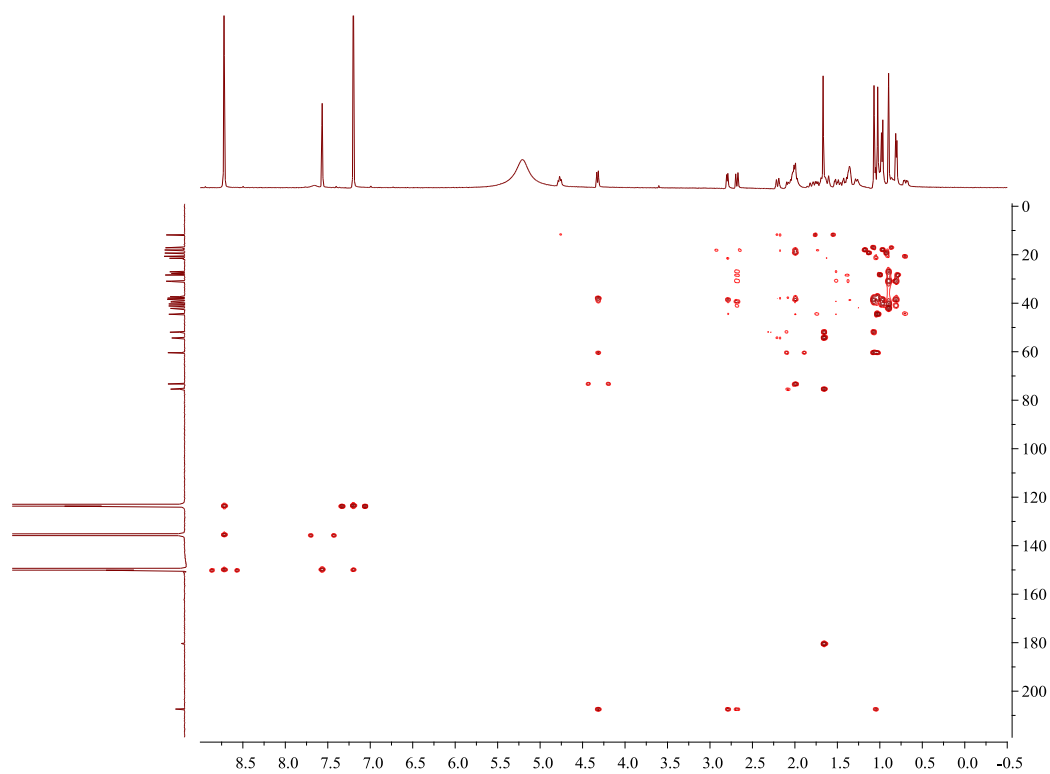

**Fig. S49.** HMBC spectrum of compound **5**—expansion.

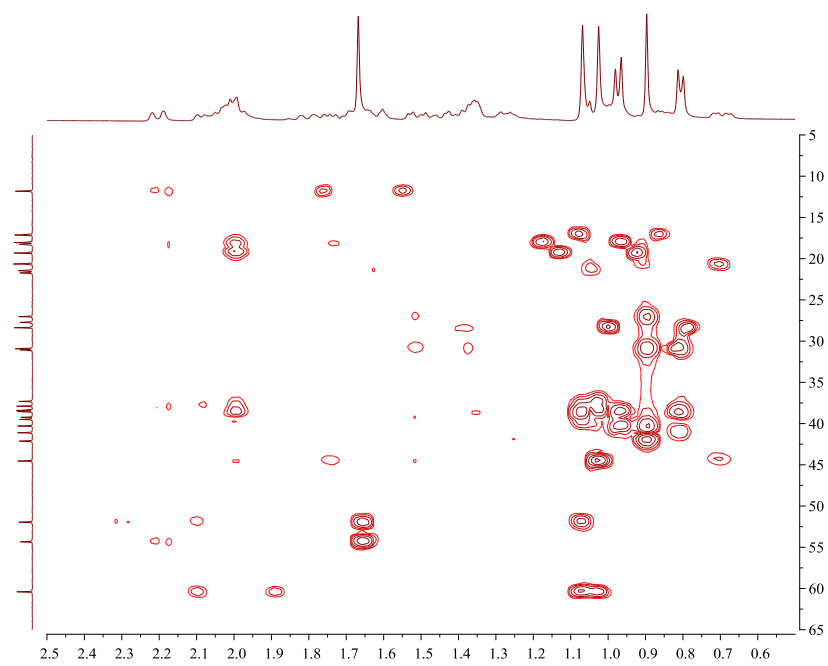

**Fig. S50.** ROESY spectrum of compound **5** in C<sub>5</sub>D<sub>5</sub>N (600 MHz).

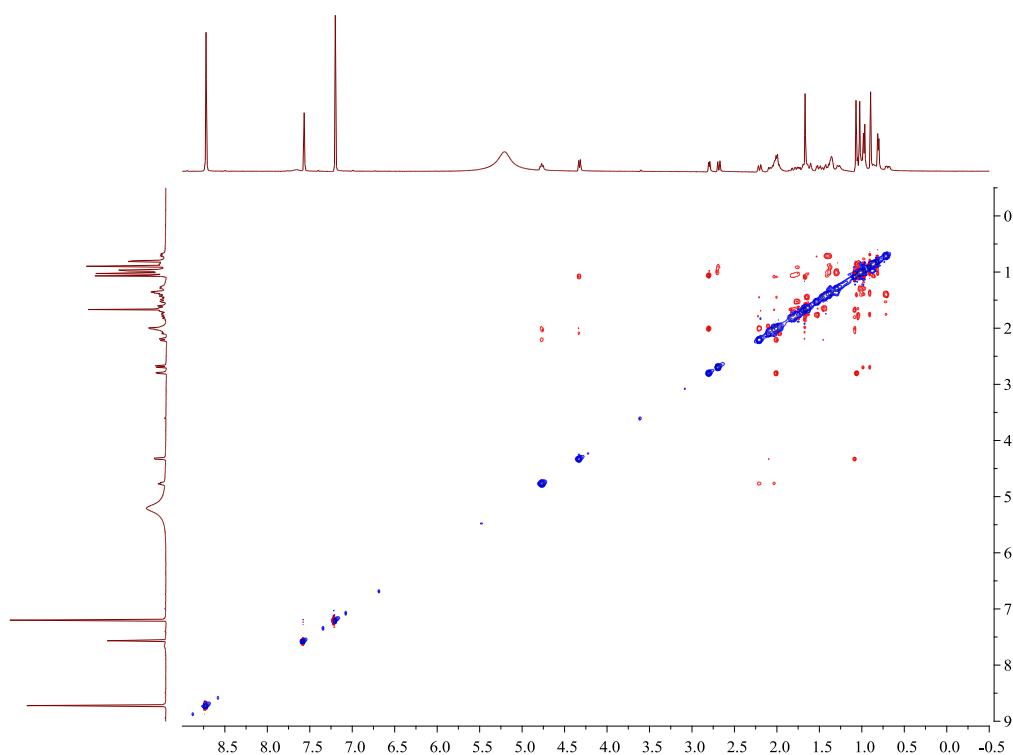

**Fig. S51.** HRESIMS report of compound **5**.

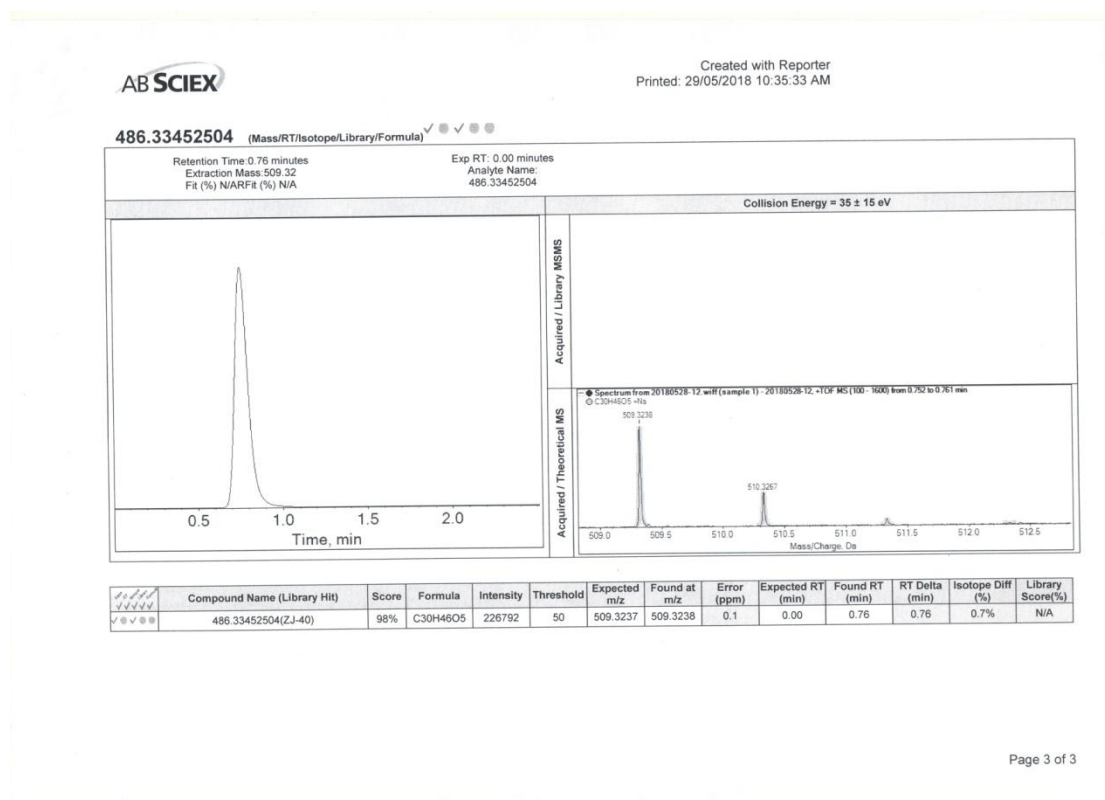

**Fig. S52.** Experimental ECD spectra of **4** (red curve) and **5** (black curve) in MeOH..

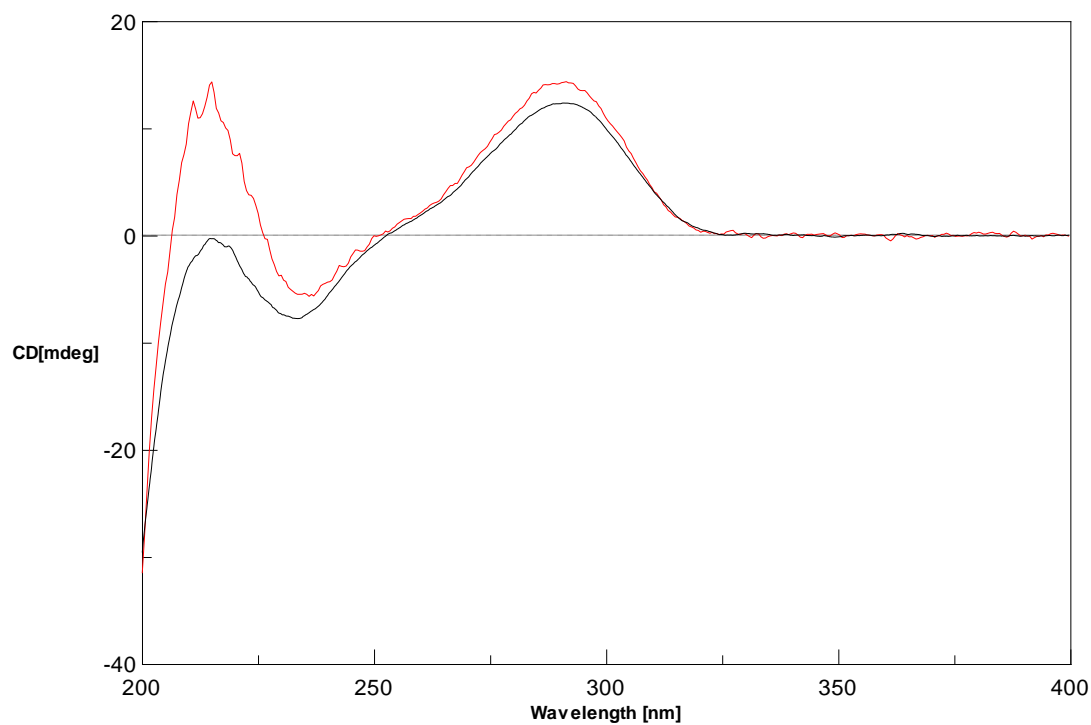

**Fig. S53.**  $^1\text{H}$  NMR spectrum of compound **6** in  $\text{C}_5\text{D}_5\text{N}$  (400 MHz).

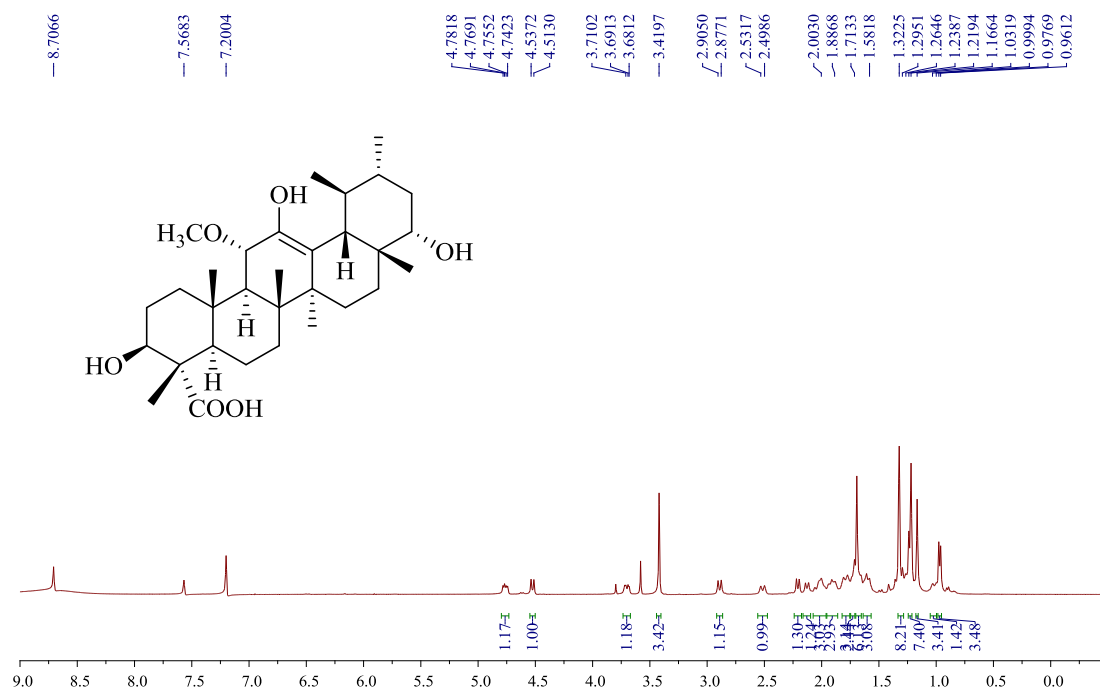

**Fig. S54.**  $^1\text{H}$  NMR spectrum of compound **6**—expansion.

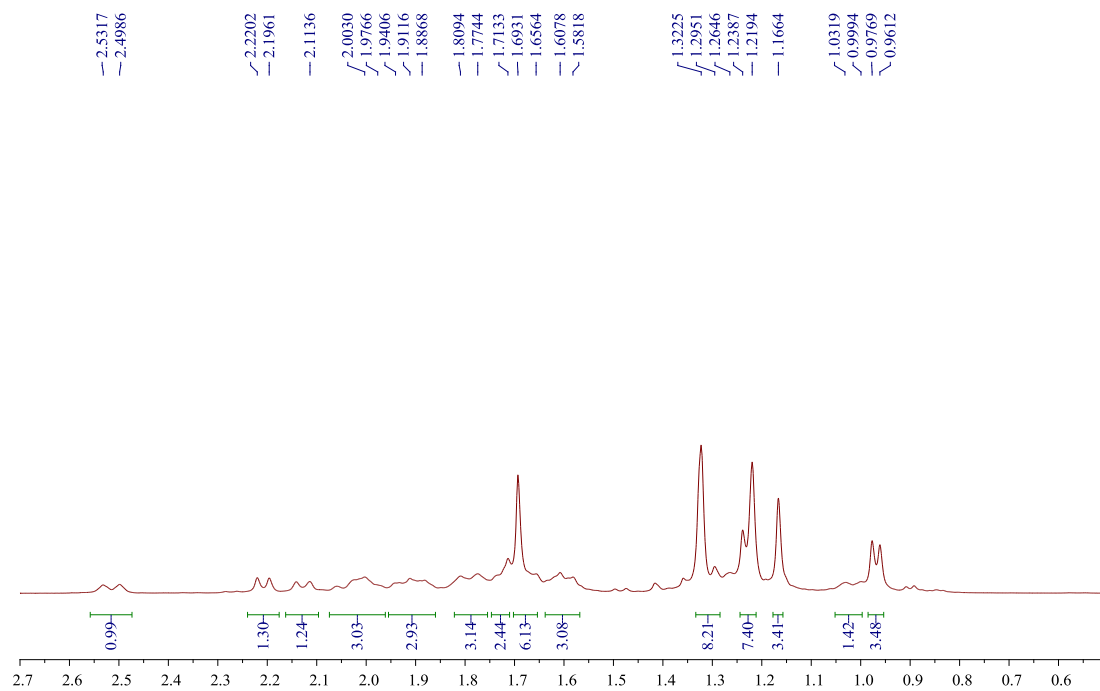

**Fig. S55.**  $^{13}\text{C}$  NMR spectrum of compound **6** in  $\text{C}_5\text{D}_5\text{N}$  (150 MHz).

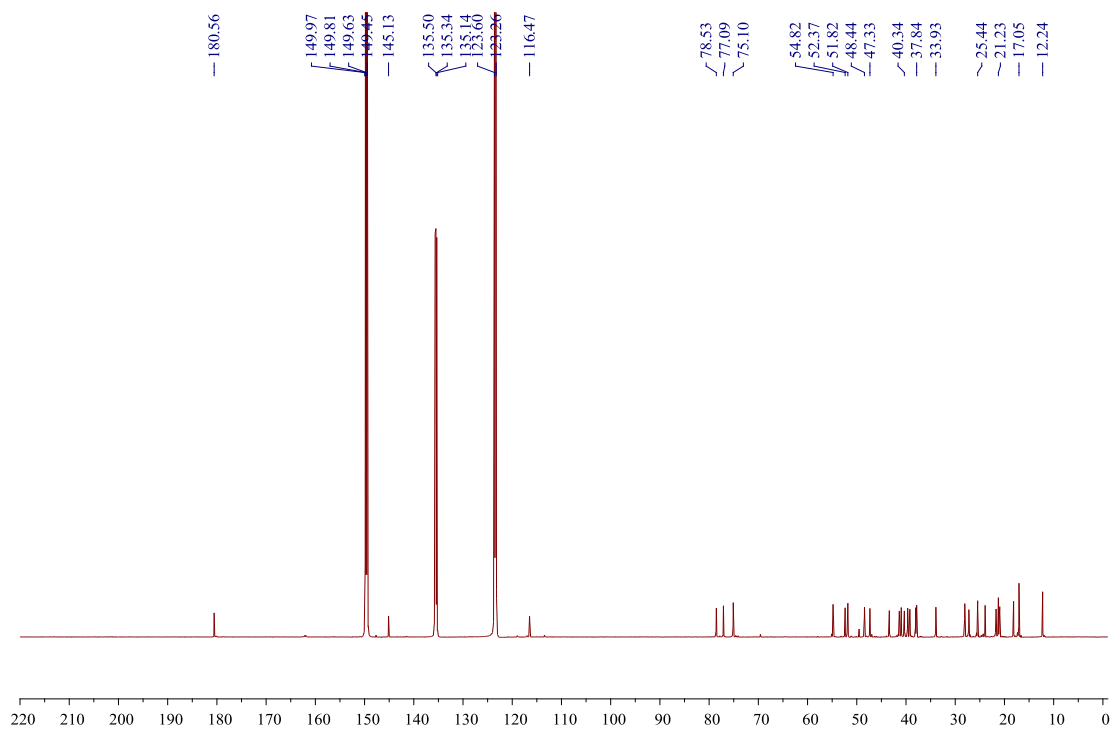

**Fig. S56.**  $^{13}\text{C}$  NMR spectrum of compound **6**—expansion.

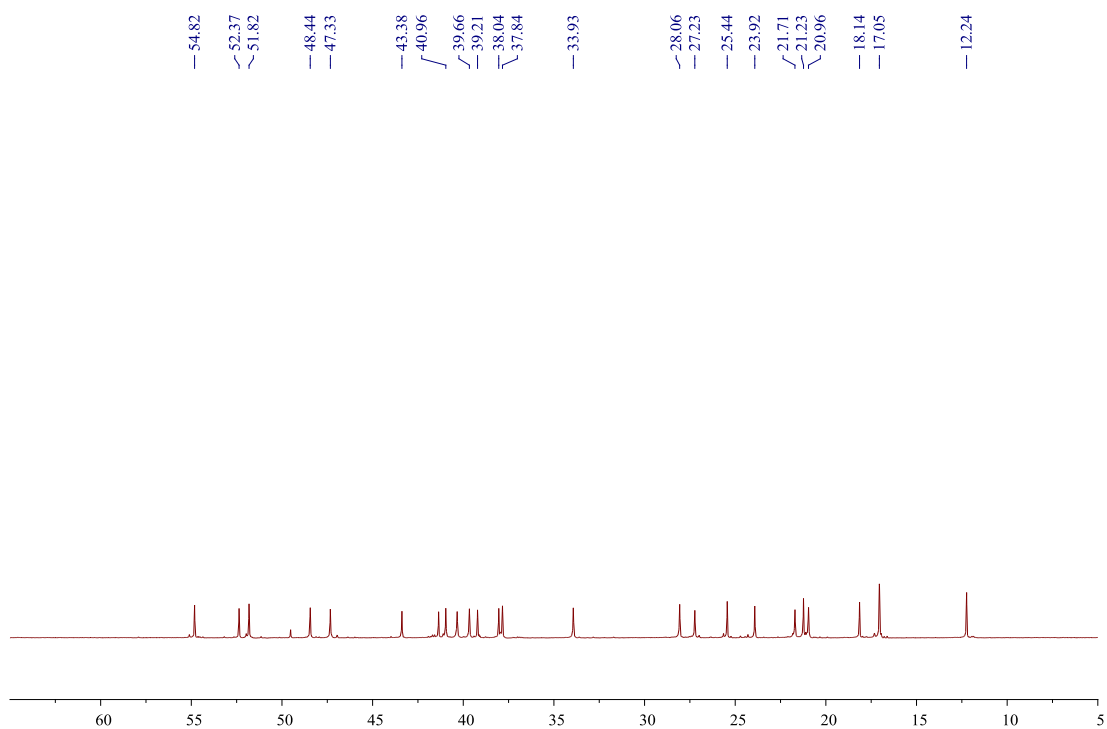

**Fig. S57.** HSQC spectrum of compound **6** in  $\text{C}_5\text{D}_5\text{N}$  (600 MHz).

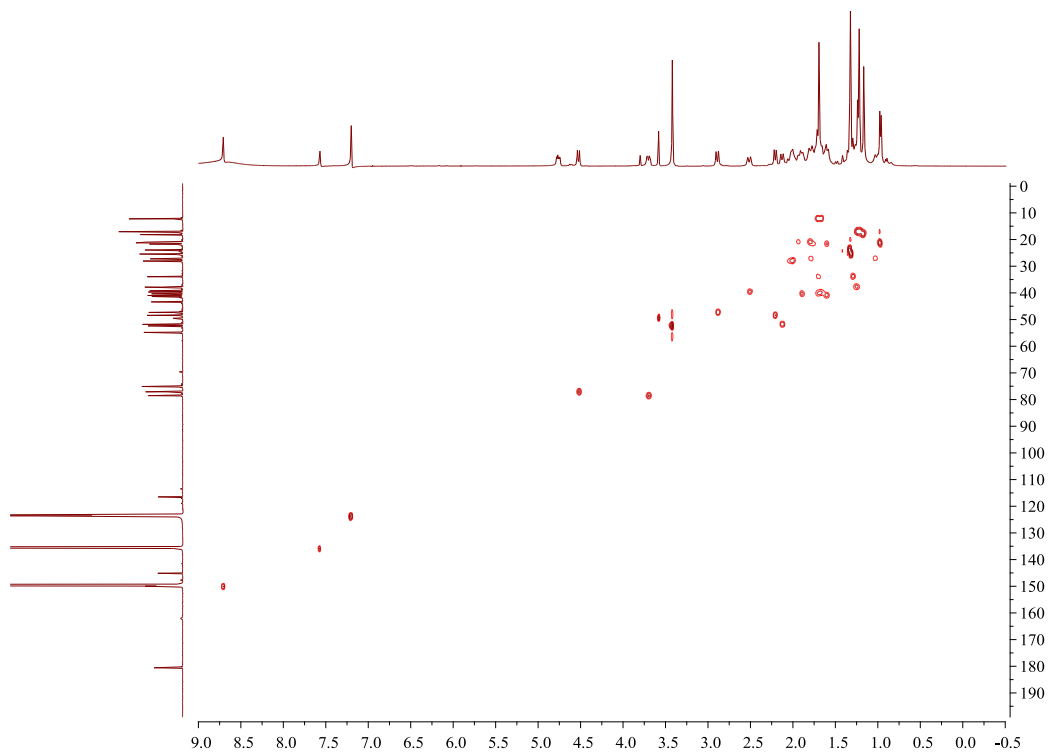

**Fig. S58.** HMBC spectrum of compound **6** in C<sub>5</sub>D<sub>5</sub>N (600 MHz).

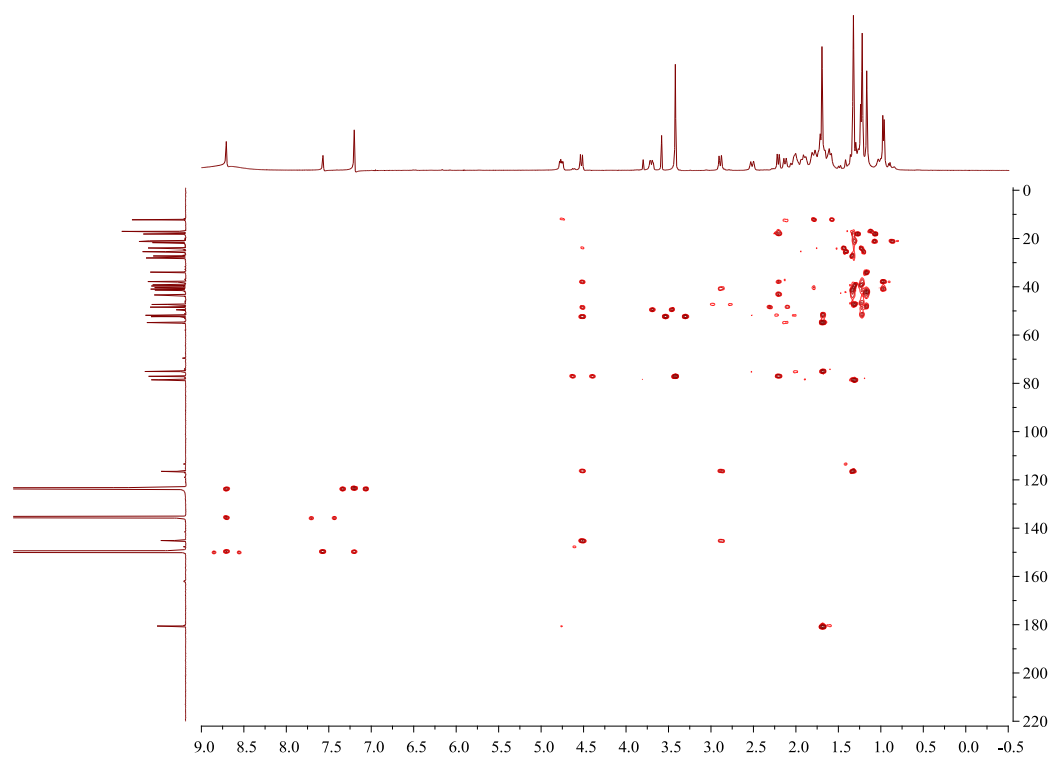

**Fig. S59.** HMBC spectrum of compound **6**—expansion.

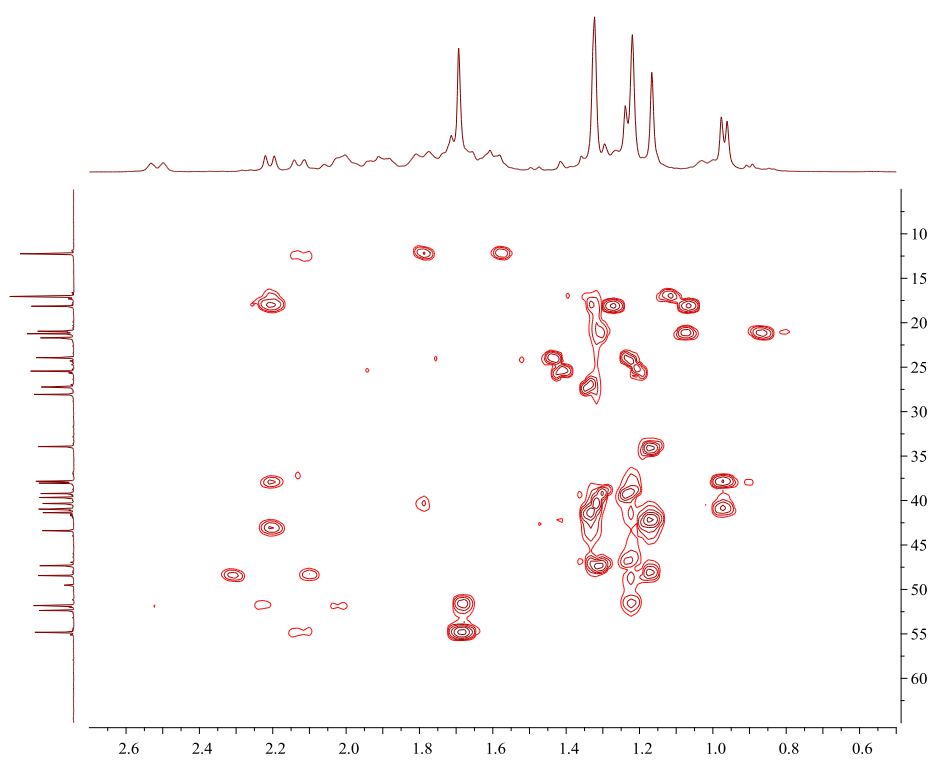



**Fig. S60.** ROESY spectrum of compound **6** in C<sub>5</sub>D<sub>5</sub>N (600 MHz).

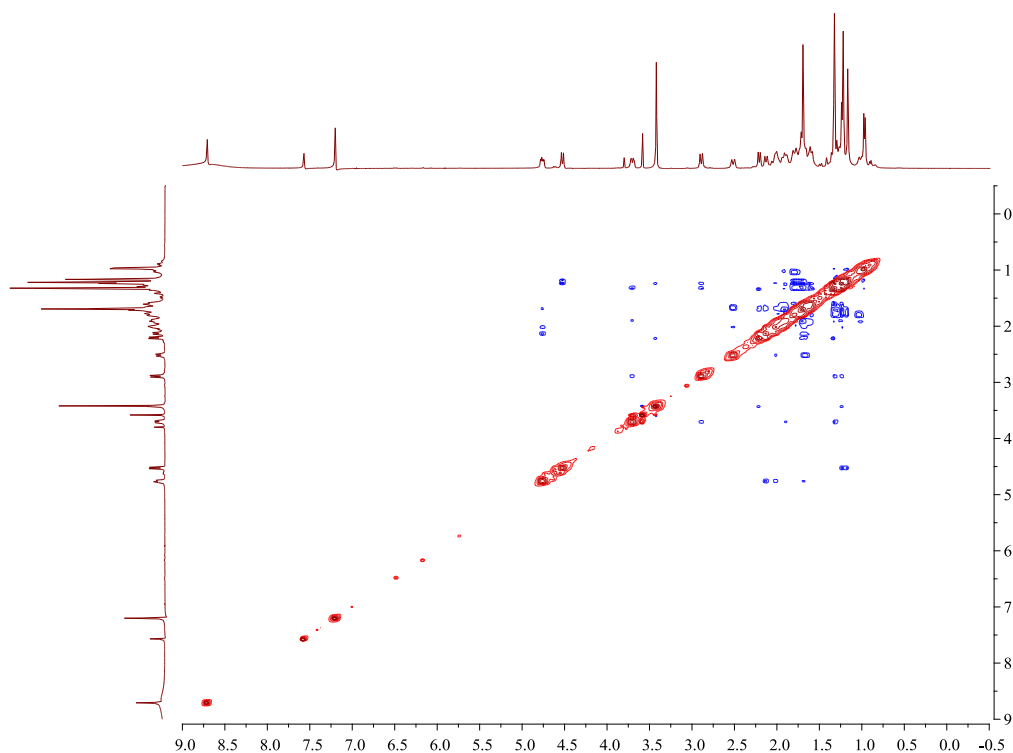

**Fig. S61.** HRESIMS report of compound **6**.

0

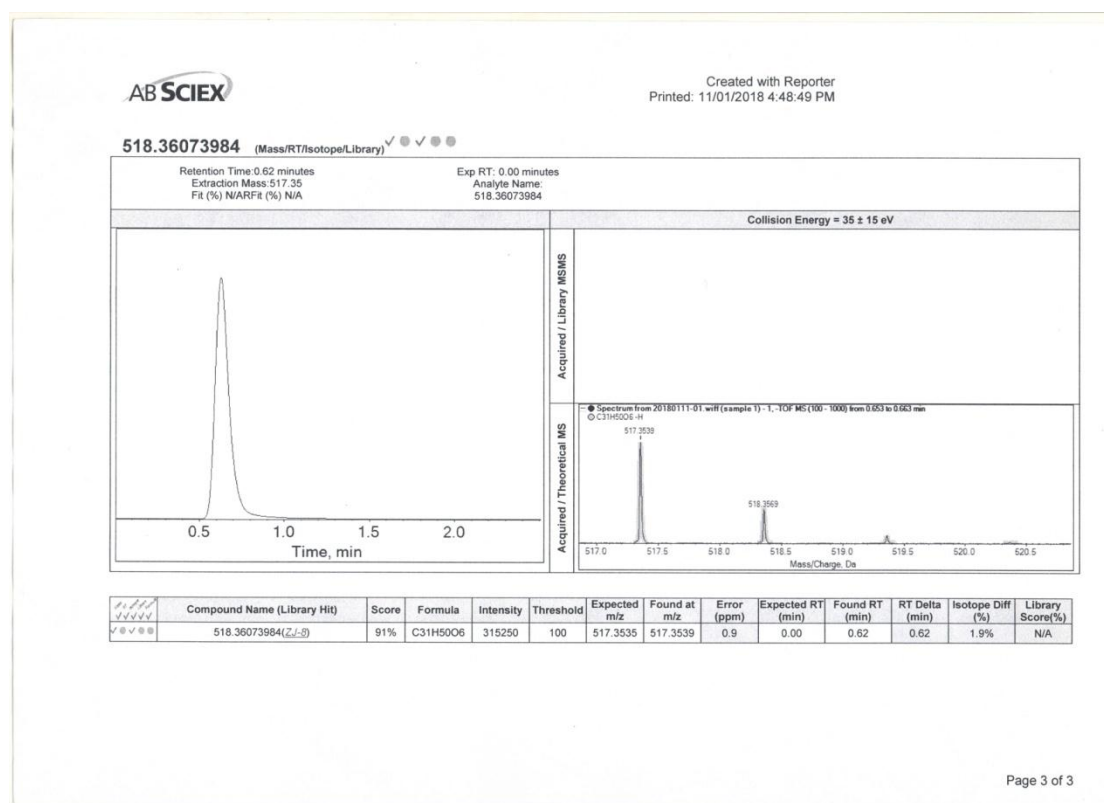

**Fig. S62.**  $^1\text{H}$  NMR spectrum of compound **7** in  $\text{C}_5\text{D}_5\text{N}$  (400 MHz).

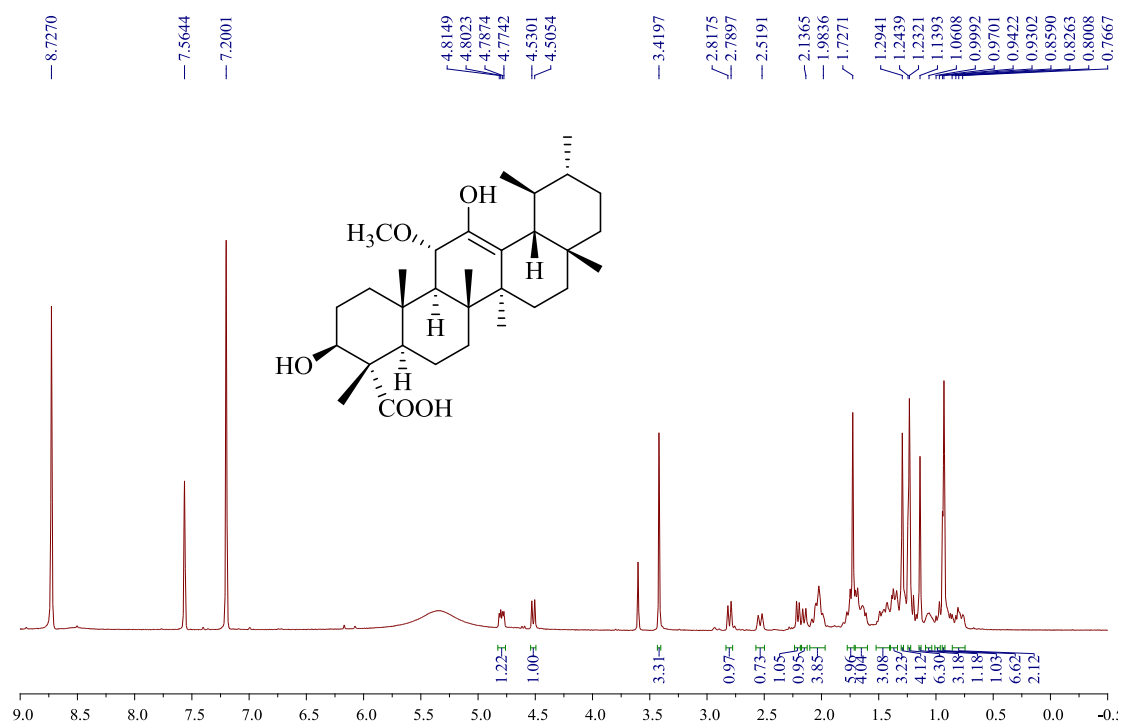

**Fig. S63.**  $^1\text{H}$  NMR spectrum of compound **7**-expansion.

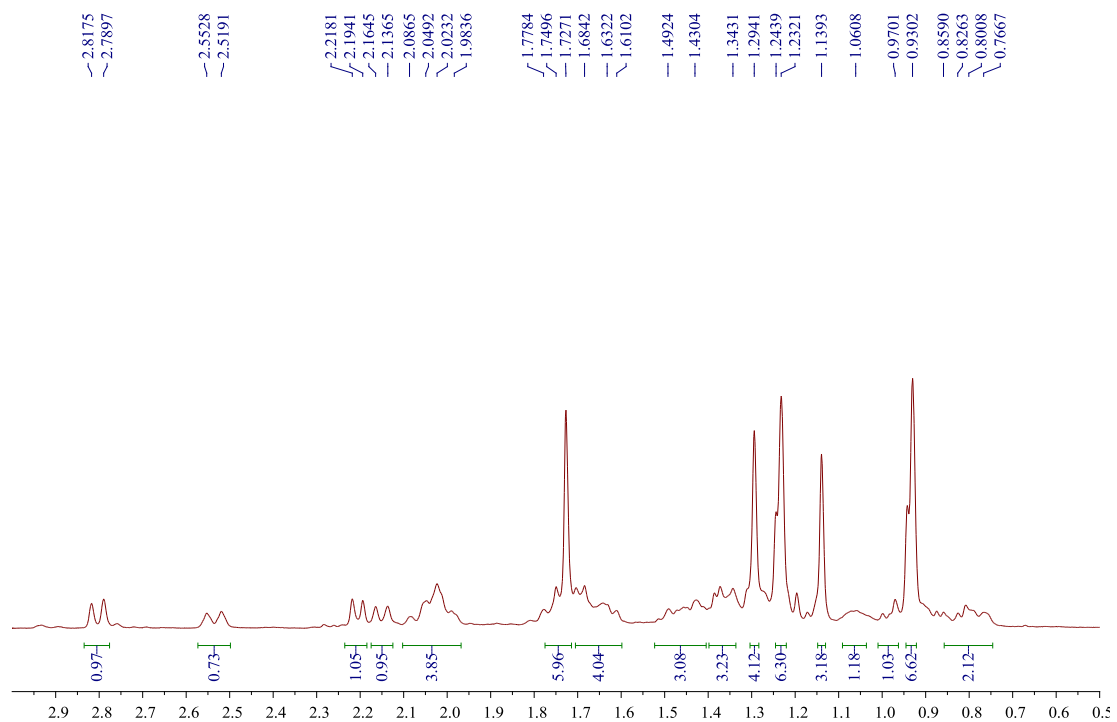

**Fig. S64.**  $^{13}\text{C}$  NMR spectrum of compound **7** in  $\text{C}_5\text{D}_5\text{N}$  (150 MHz).

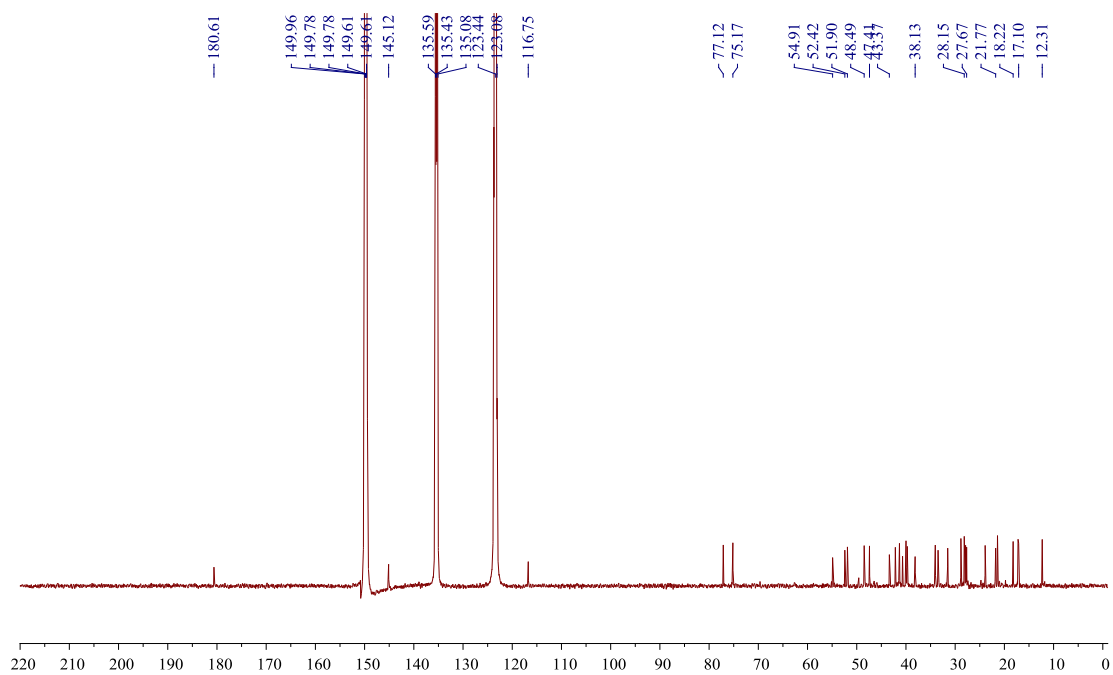

**Fig. S65.**  $^{13}\text{C}$  NMR spectrum of compound **7** –expansion.

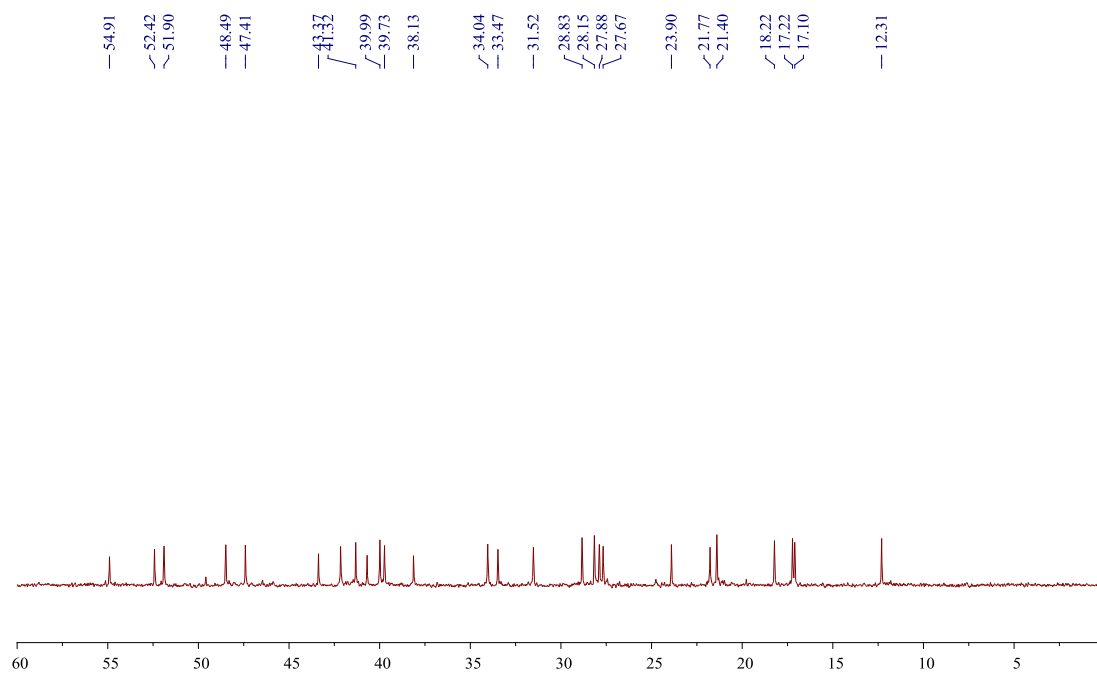

**Fig. S66.** HSQC spectrum of compound **7** in C<sub>5</sub>D<sub>5</sub>N (600 MHz).

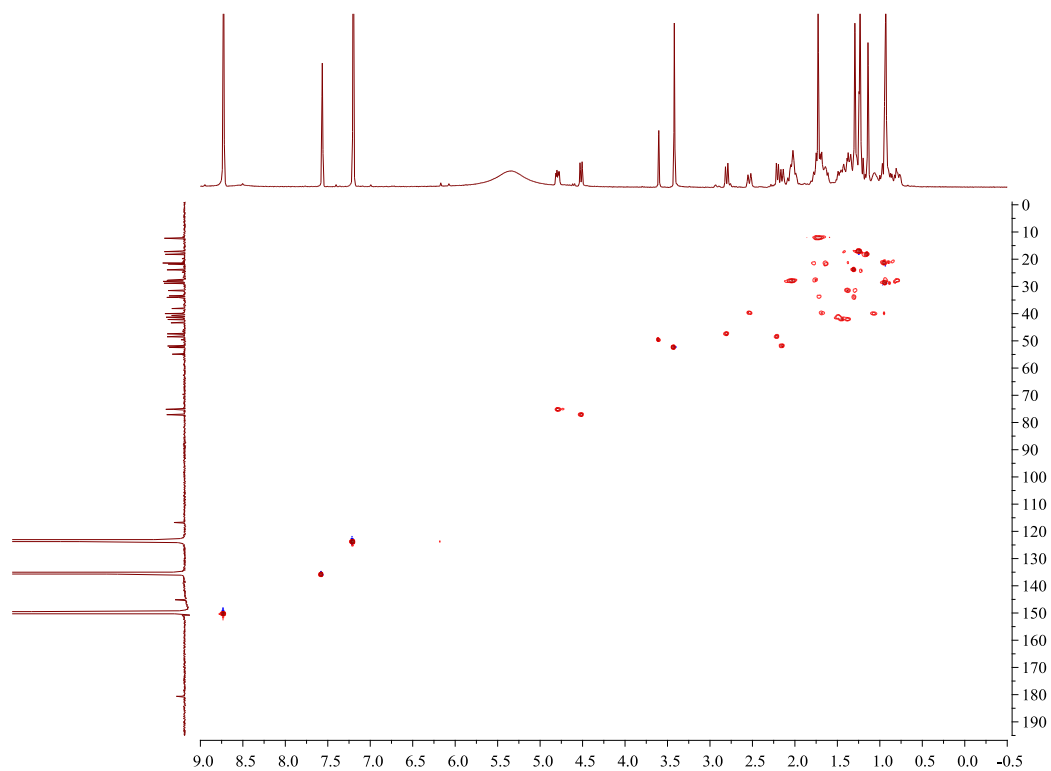

**Fig. S67.** HMBC spectrum of compound **7** in C<sub>5</sub>D<sub>5</sub>N (600 MHz).

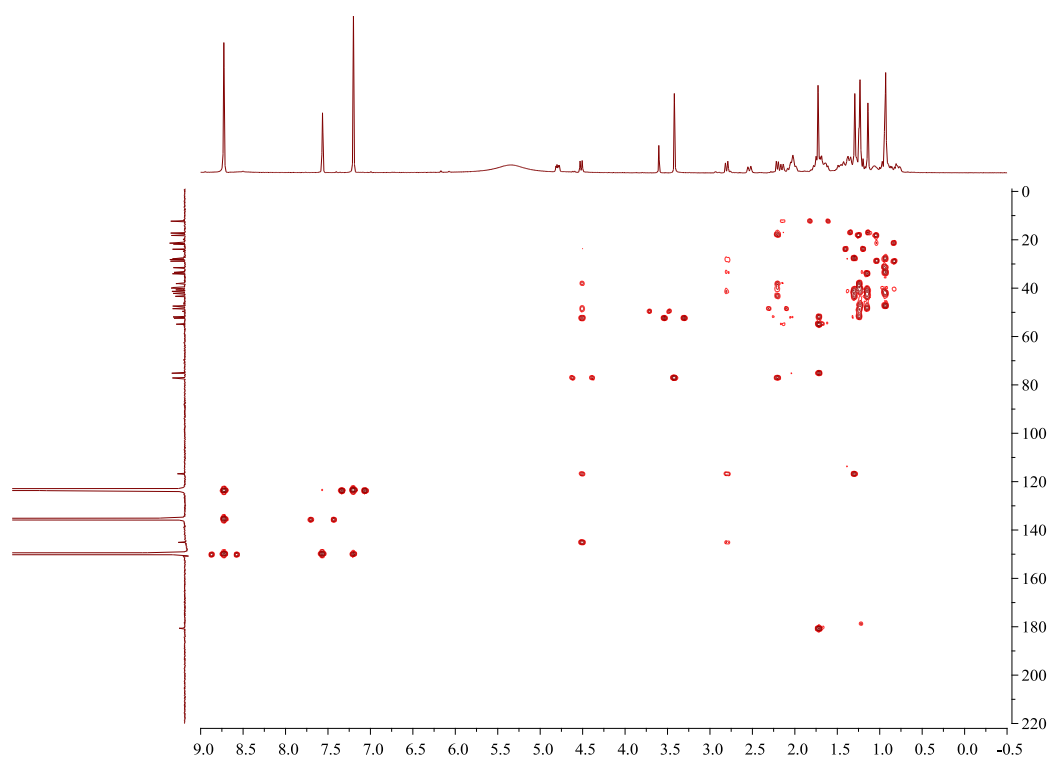

**Fig. S68.** ROESY spectrum of compound **7** in C<sub>5</sub>D<sub>5</sub>N (600 MHz).

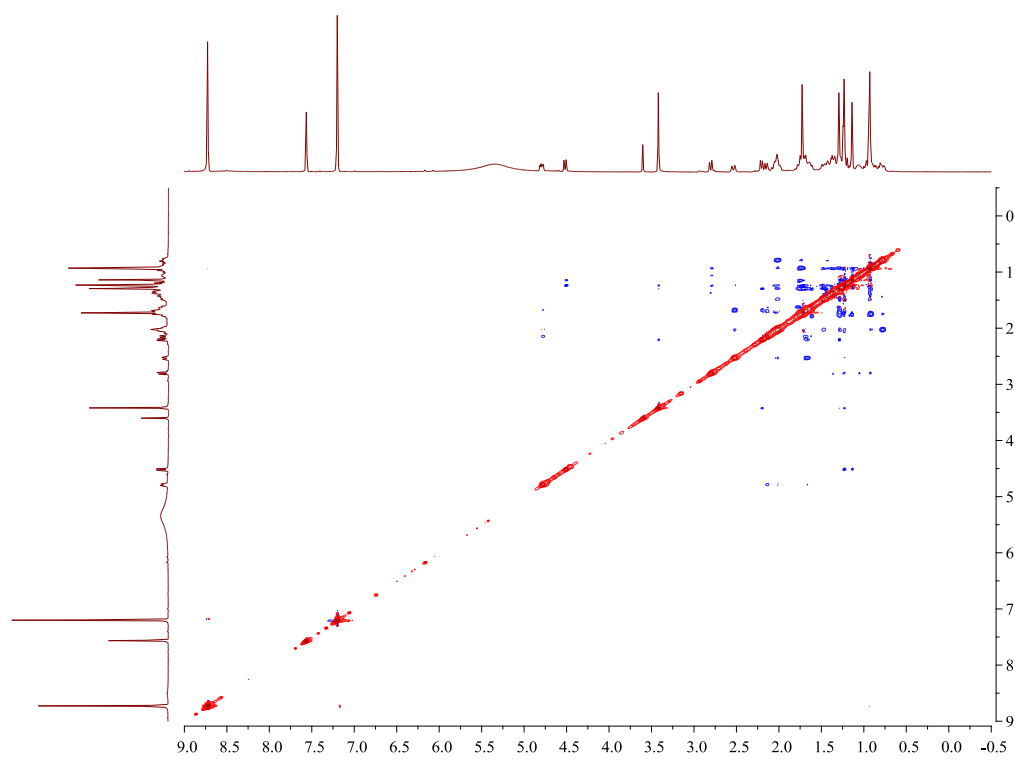

**Fig. S69.** ROESY spectrum of compound **7**-expansion.

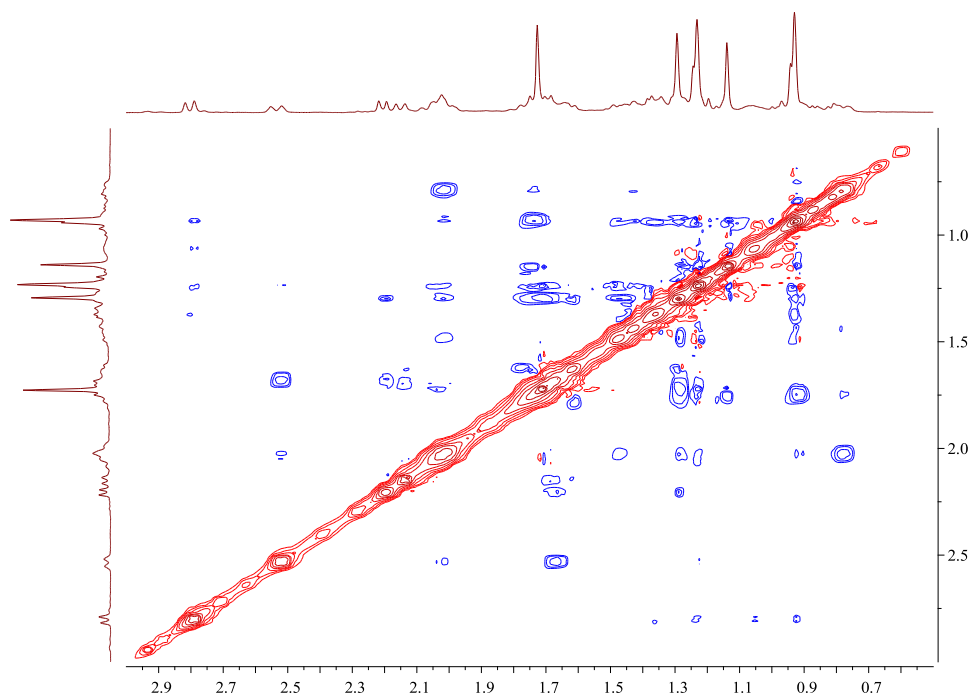

**Fig. S70.** HRESIMS report of compound **7**.

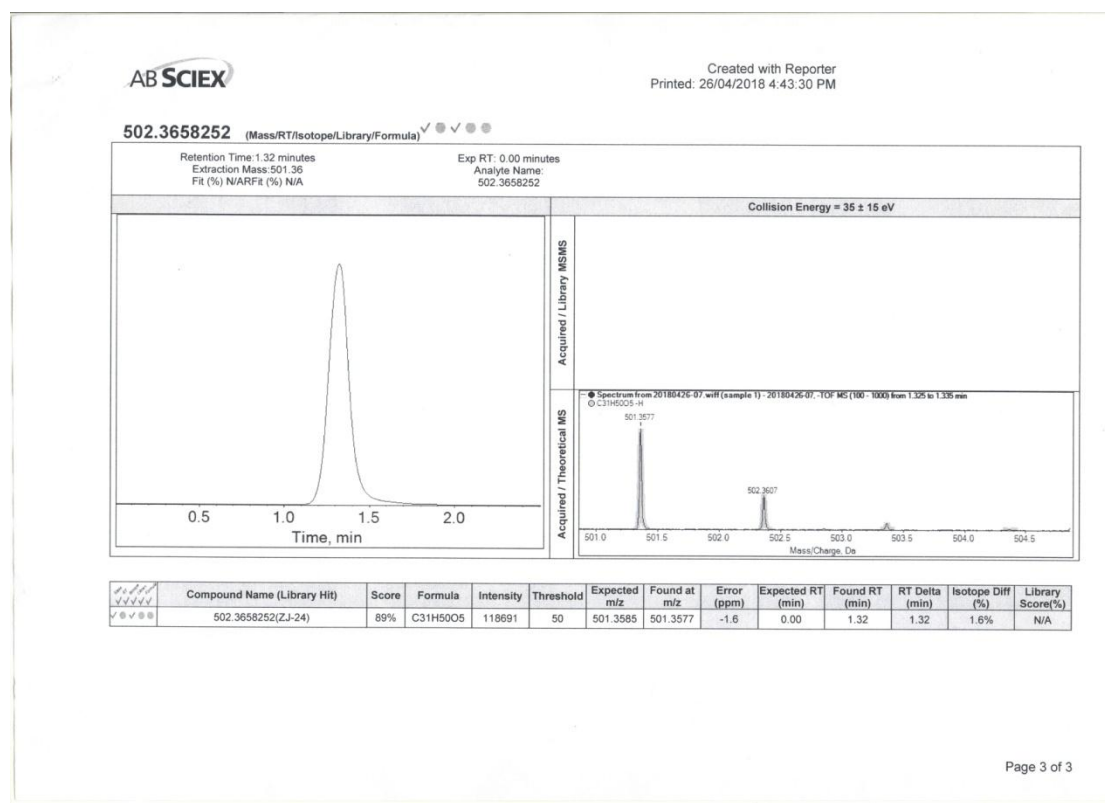

**Fig. S71.** Experimental ECD spectra of **6** (red curve) and **7** (black curve) in MeOH.

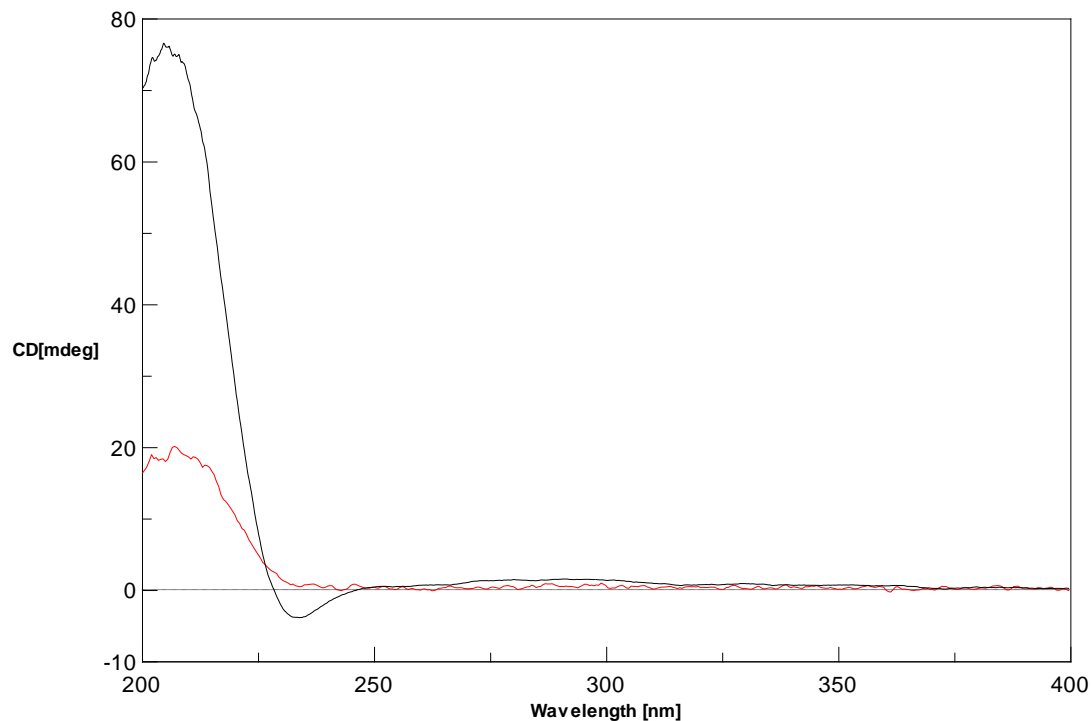

**Fig. S72.**  $^1\text{H}$  NMR spectrum of compound **8** in  $\text{CD}_3\text{OD}$  (400 MHz).

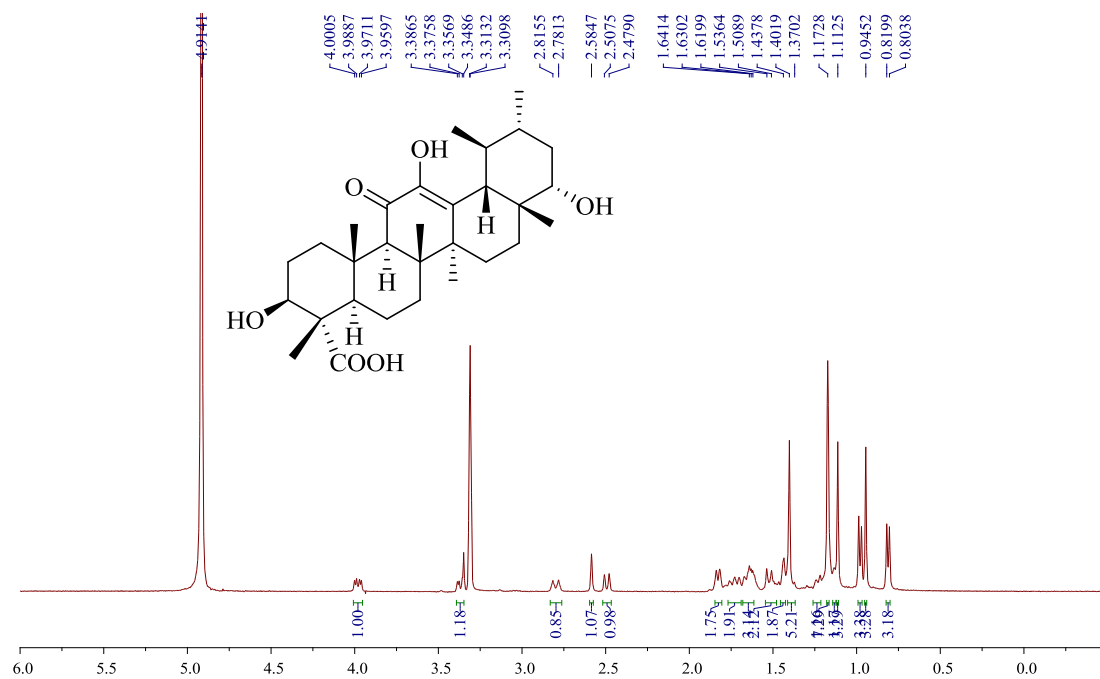

**Fig. S73.**  $^1\text{H}$  NMR spectrum of compound **8**-expansion.

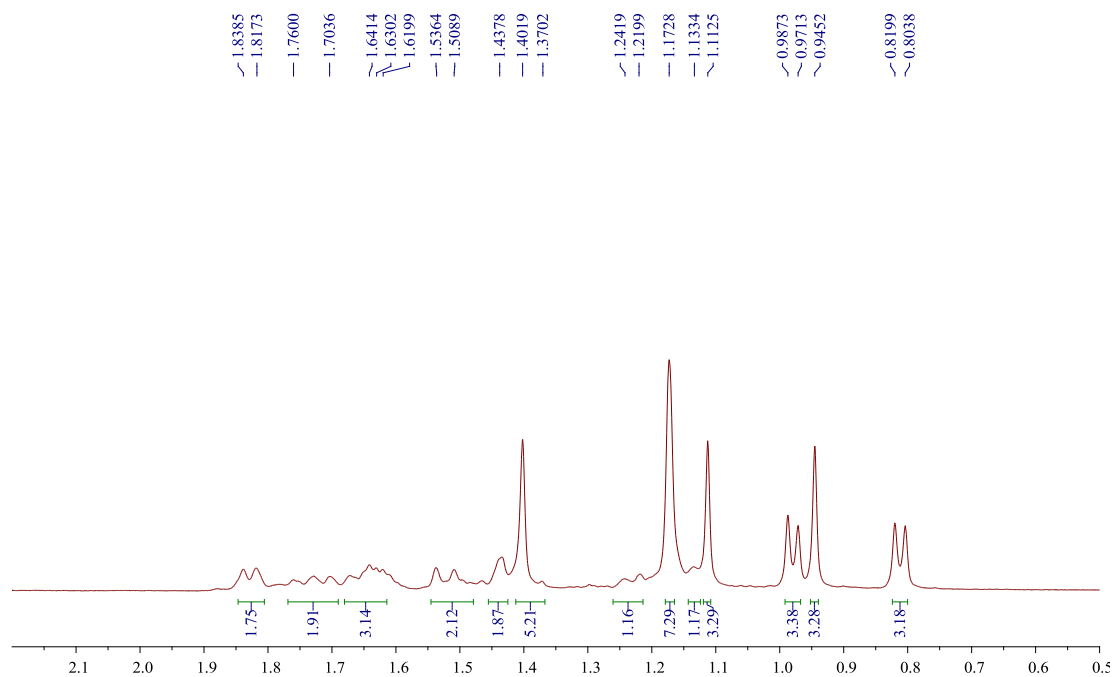

**Fig. S74.**  $^{13}\text{C}$  NMR spectrum of compound **8** in  $\text{CD}_3\text{OD}$  (150 MHz).

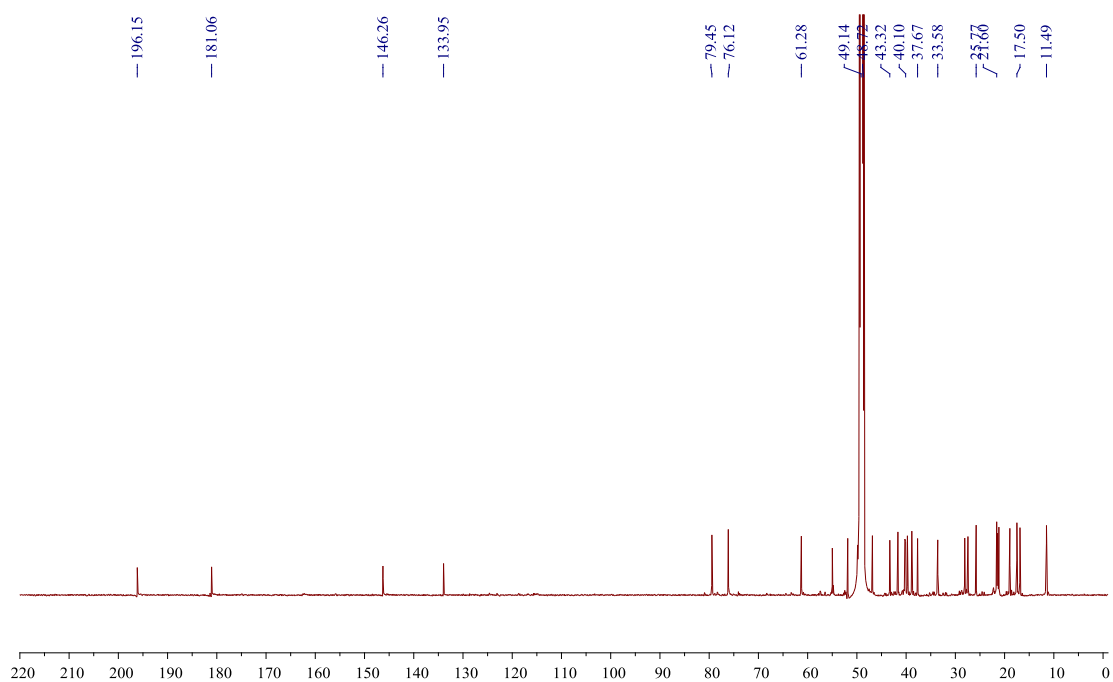

**Fig. S75.**  $^{13}\text{C}$  NMR spectrum of compound **8**-expansion. The x-axis ranges from 65 to 0 ppm.

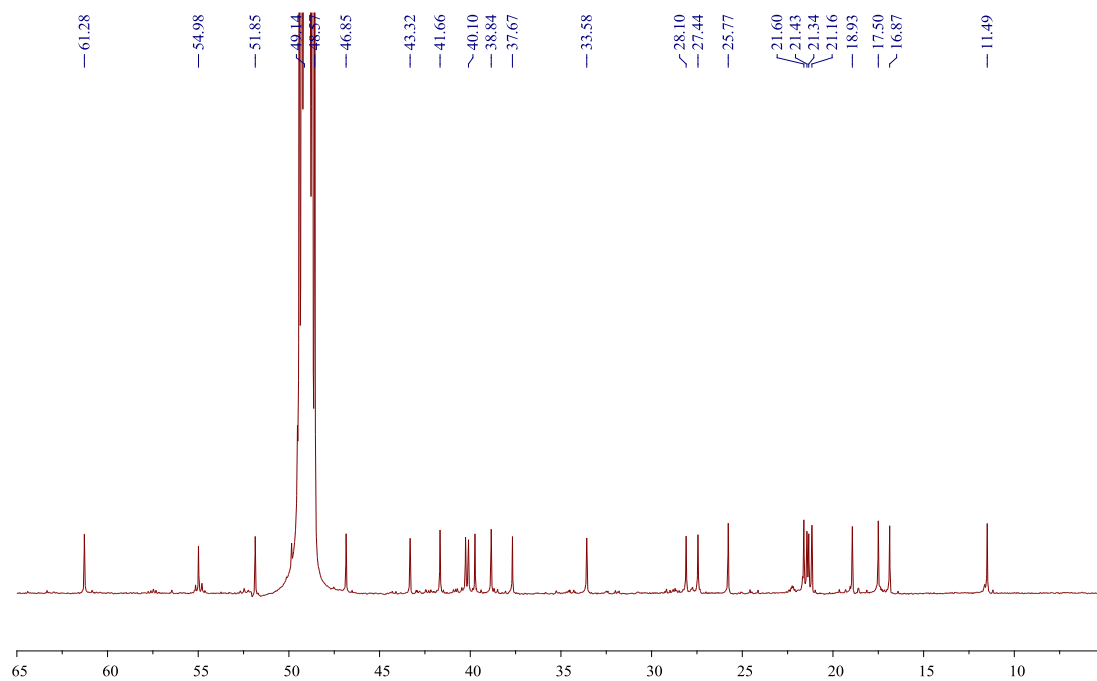



**Fig. S76.**  $^1\text{H}$ - $^1\text{H}$  COSY spectrum of compound **8** in  $\text{CD}_3\text{OD}$  (600 MHz).

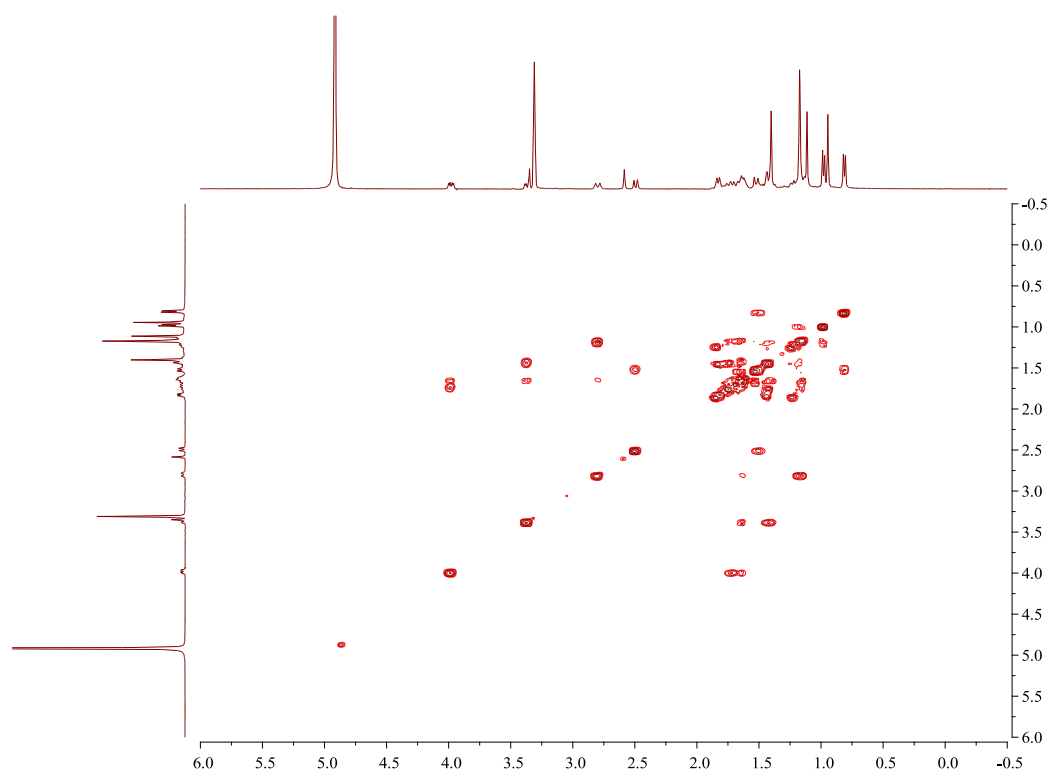

**Fig. S77.** HMBC spectrum of compound **8** in  $\text{CD}_3\text{OD}$  (600 MHz).

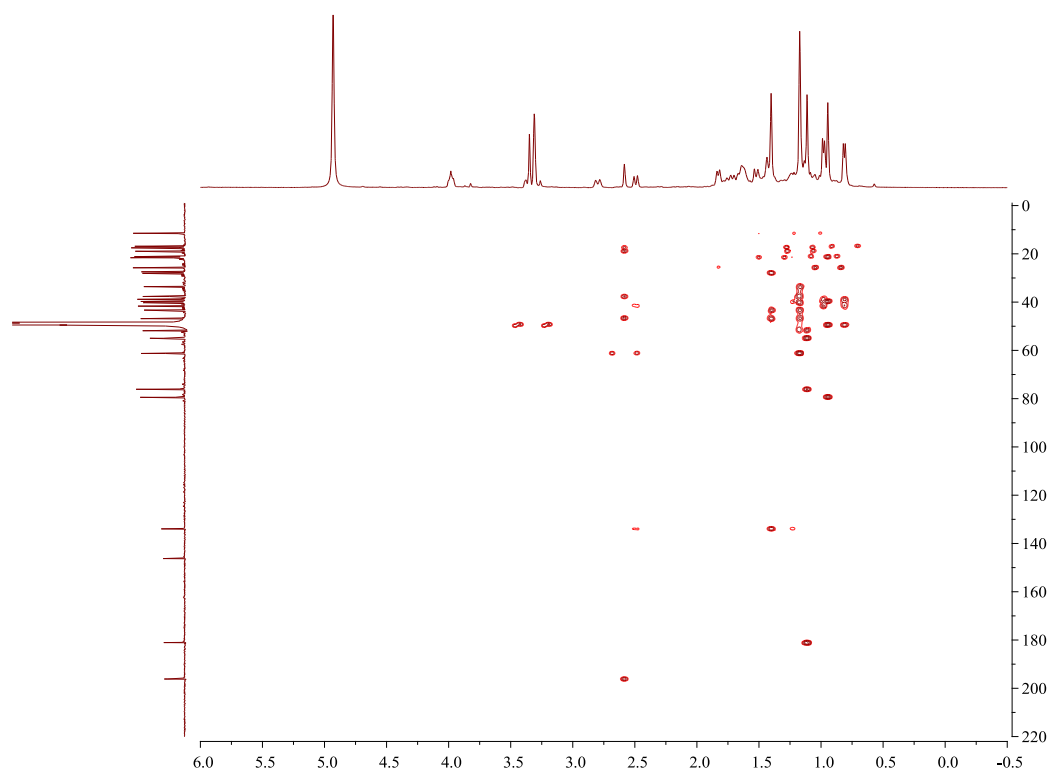

Fig. S78. HMBC spectrum of compound **8**—expansion.

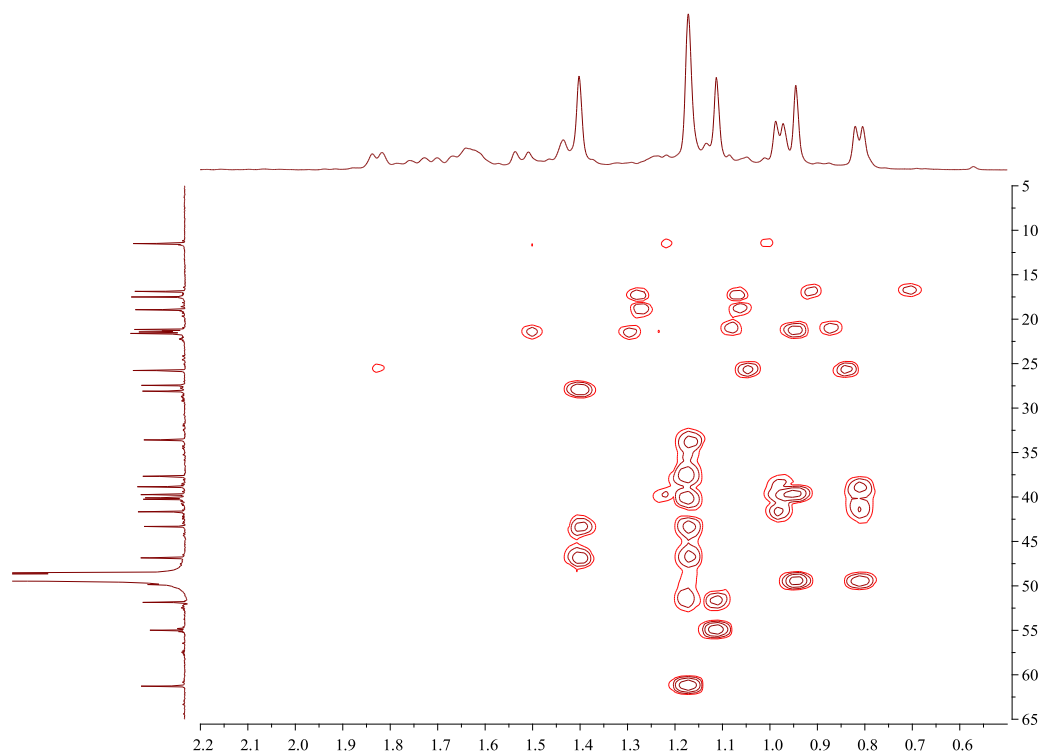

Fig. S79.  $^1\text{H}$  NMR spectrum of compound **8** in  $\text{C}_5\text{D}_5\text{N}$  (600 MHz).

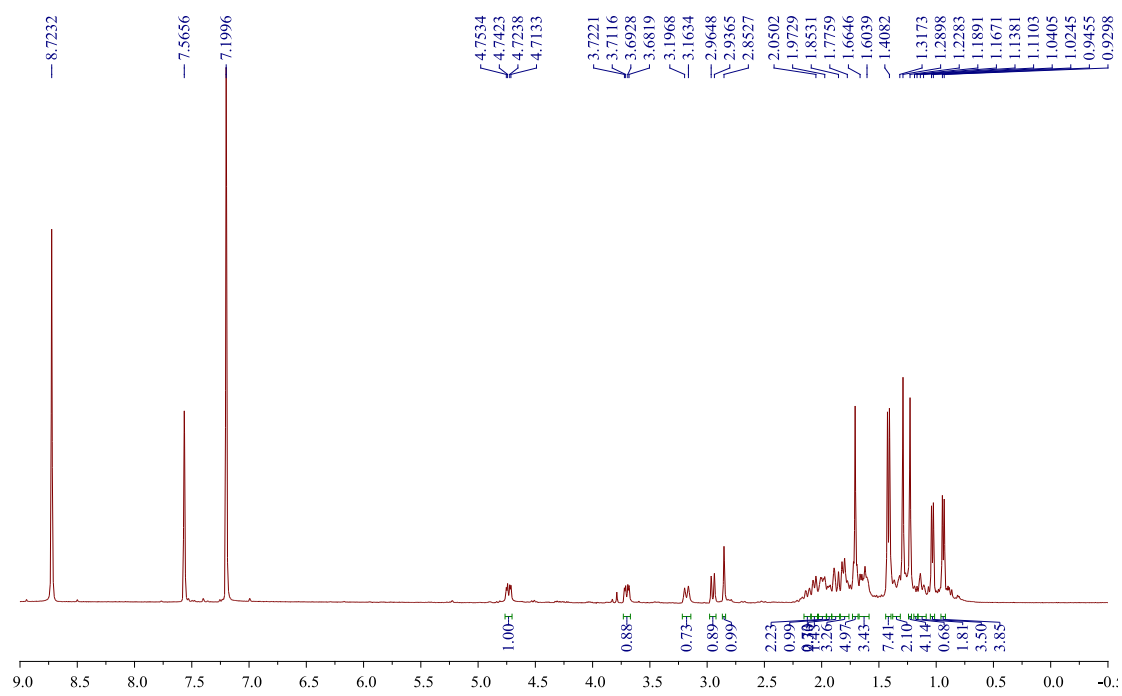

**Fig. S80.** ROESY spectrum of compound **8** in C<sub>5</sub>D<sub>5</sub>N (600 MHz).

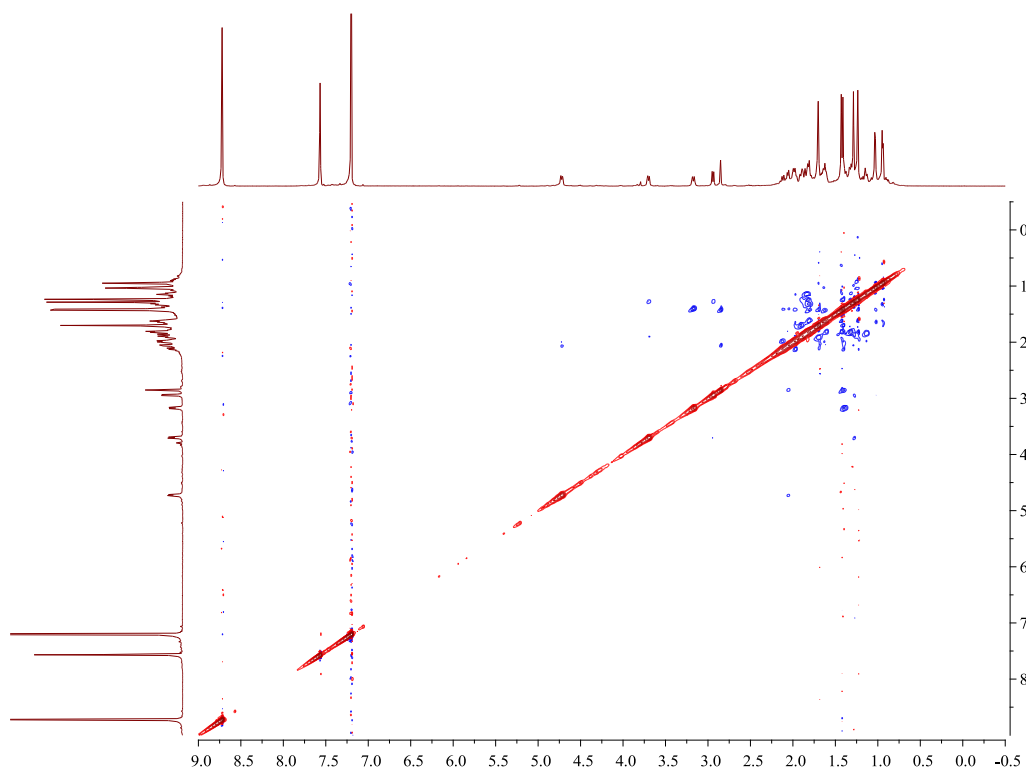

**Fig. S81.** HRESIMS report of compound **8**.

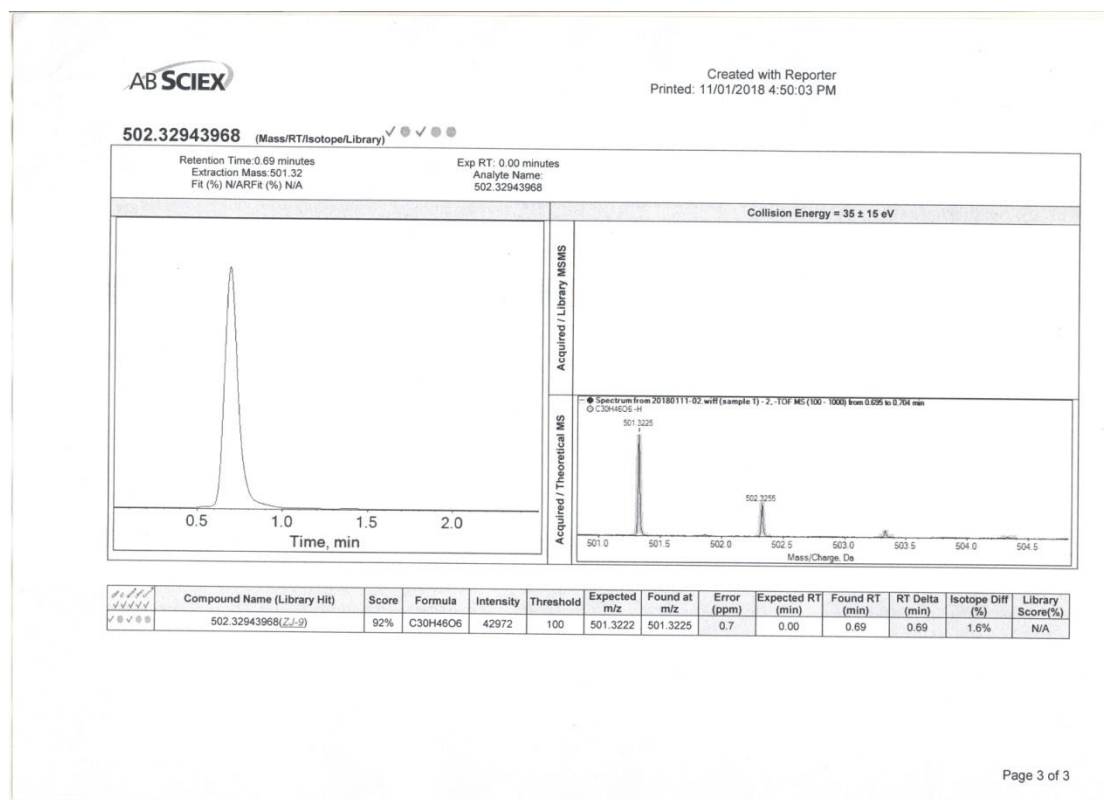

**Fig. S82.**  $^1\text{H}$  NMR spectrum of compound **9** in  $\text{CD}_3\text{OD}$  (400 MHz).

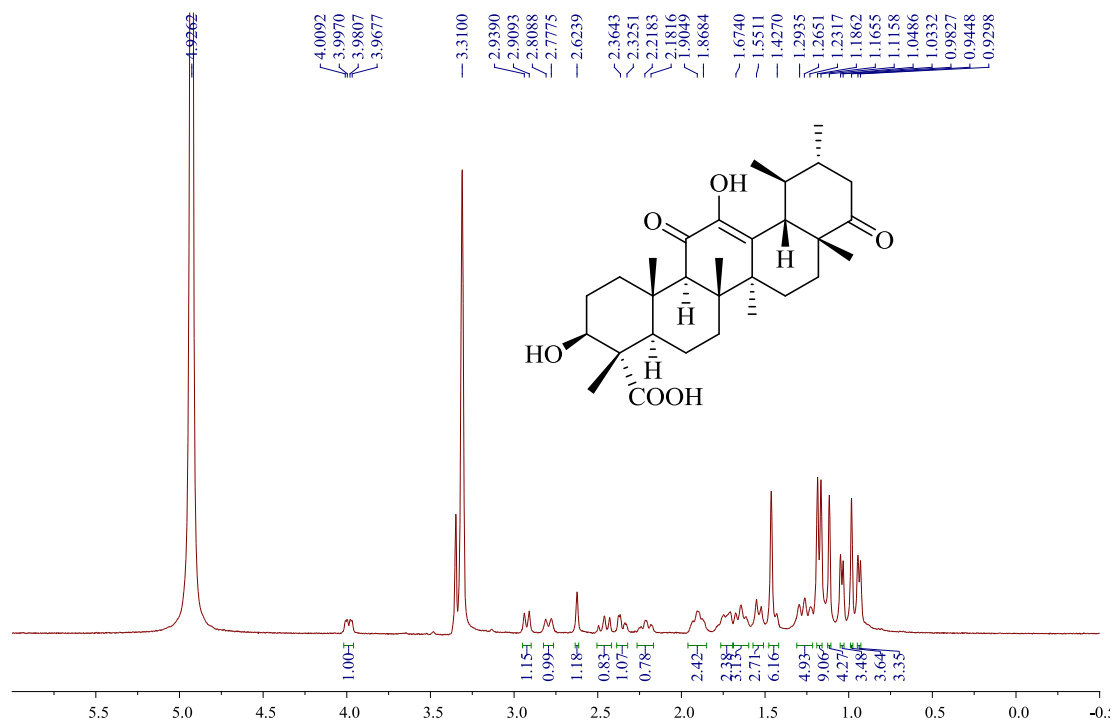

**Fig. S83.**  $^1\text{H}$  NMR spectrum of compound **9**-expansion.

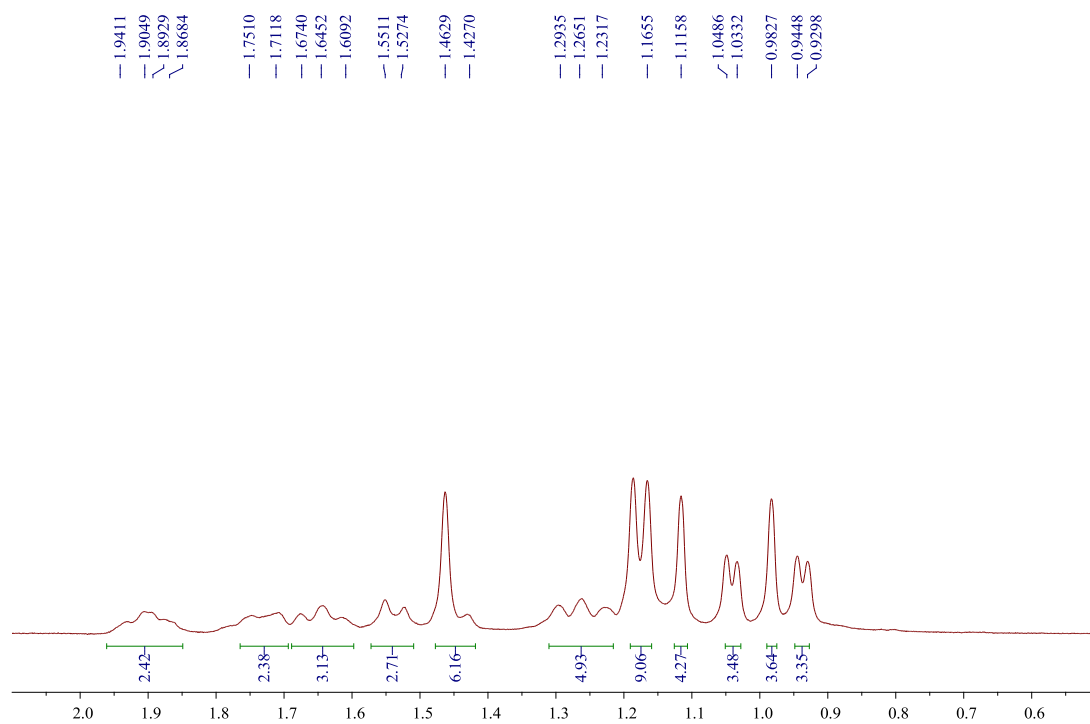

**Fig. S84.**  $^{13}\text{C}$  NMR spectrum of compound **9** in  $\text{CD}_3\text{OD}$  (150 MHz).

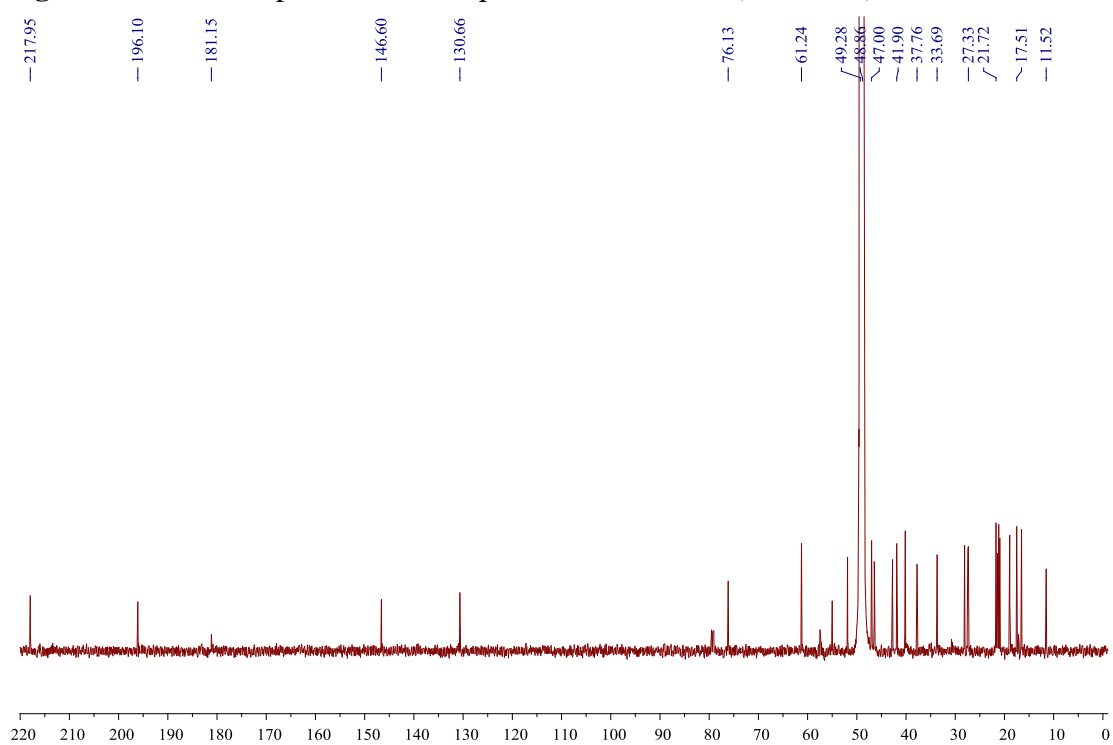

**Fig. S85.**  $^{13}\text{C}$  NMR spectrum of compound **9**-expansion. The x-axis ranges from 65 to 5 ppm.

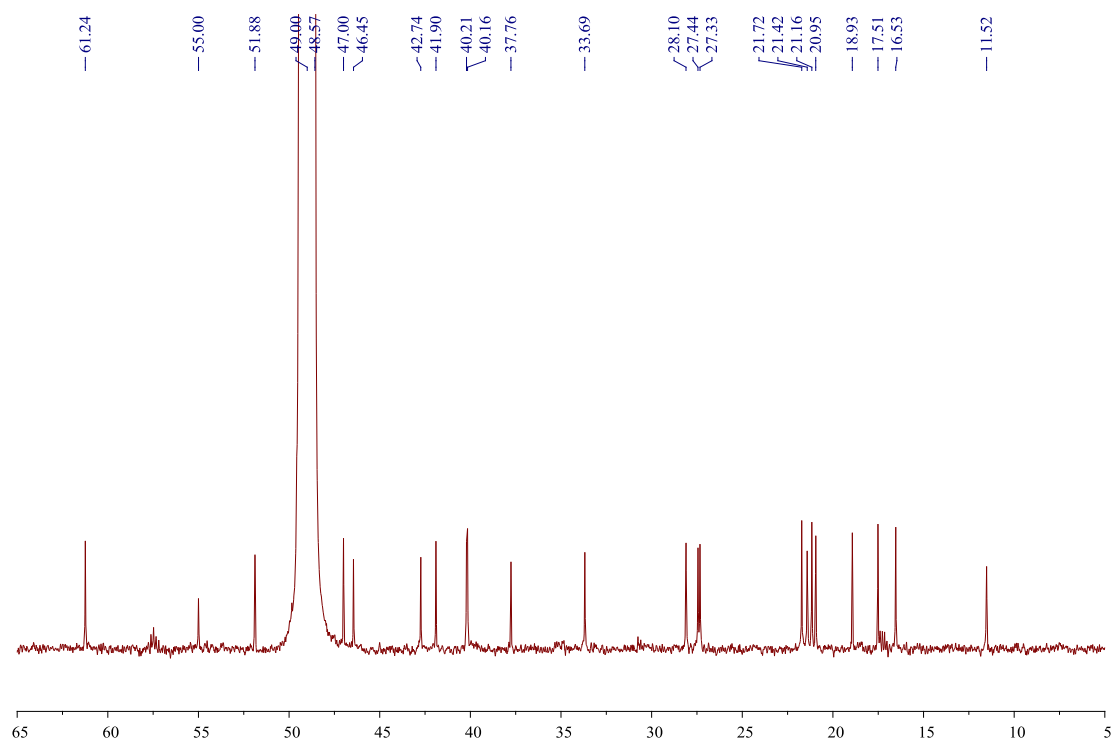

**Fig. S86.** HMBC spectrum of compound **9** in CD<sub>3</sub>OD (600 MHz).

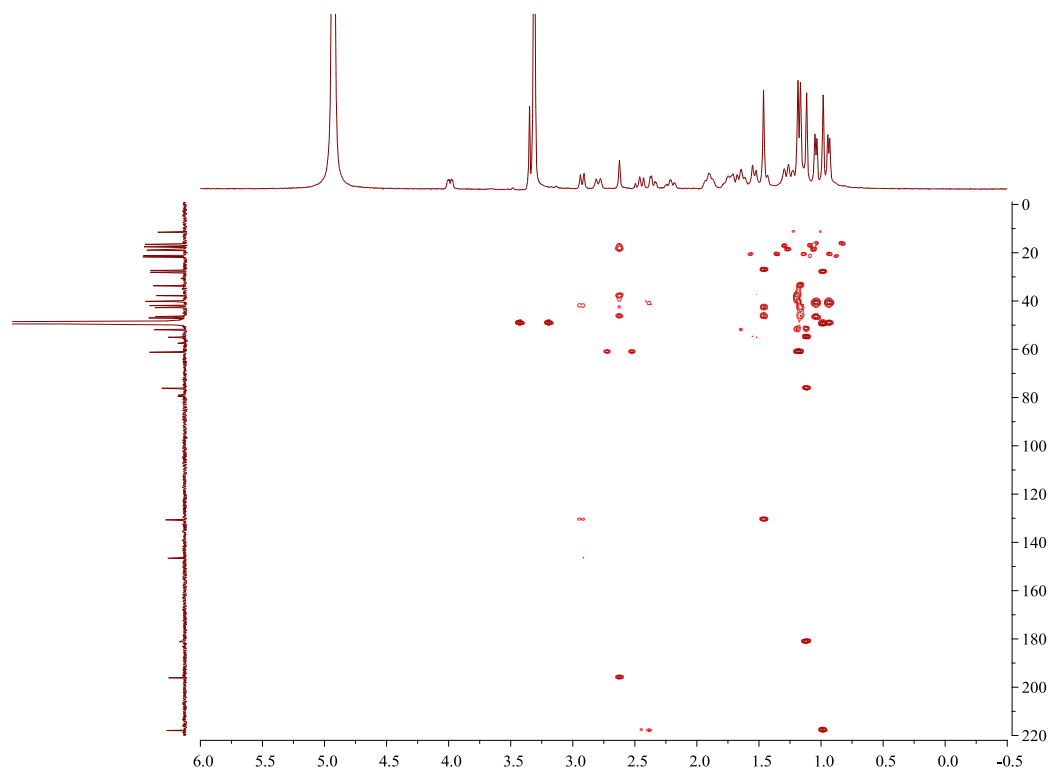

**Fig. S87.** HMBC spectrum of compound **9**-expansion.

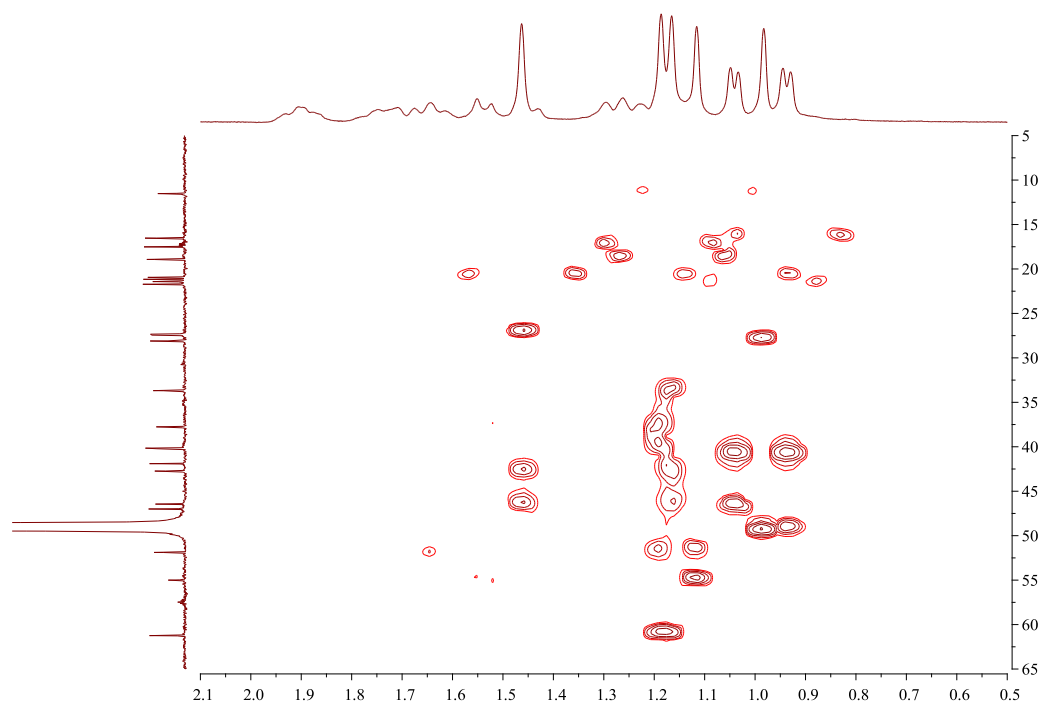

**Fig. S88.** ROESY spectrum of compound **9** in CD<sub>3</sub>OD (600 MHz).

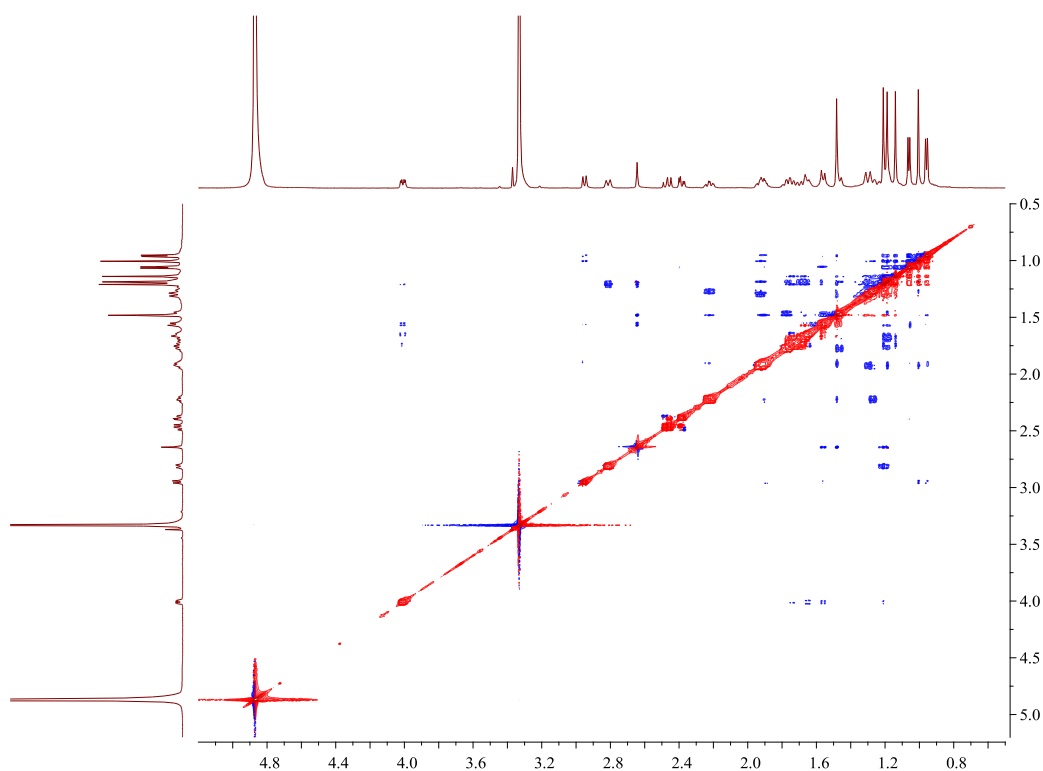

**Fig. S89.** HRESIMS report of compound **9**.

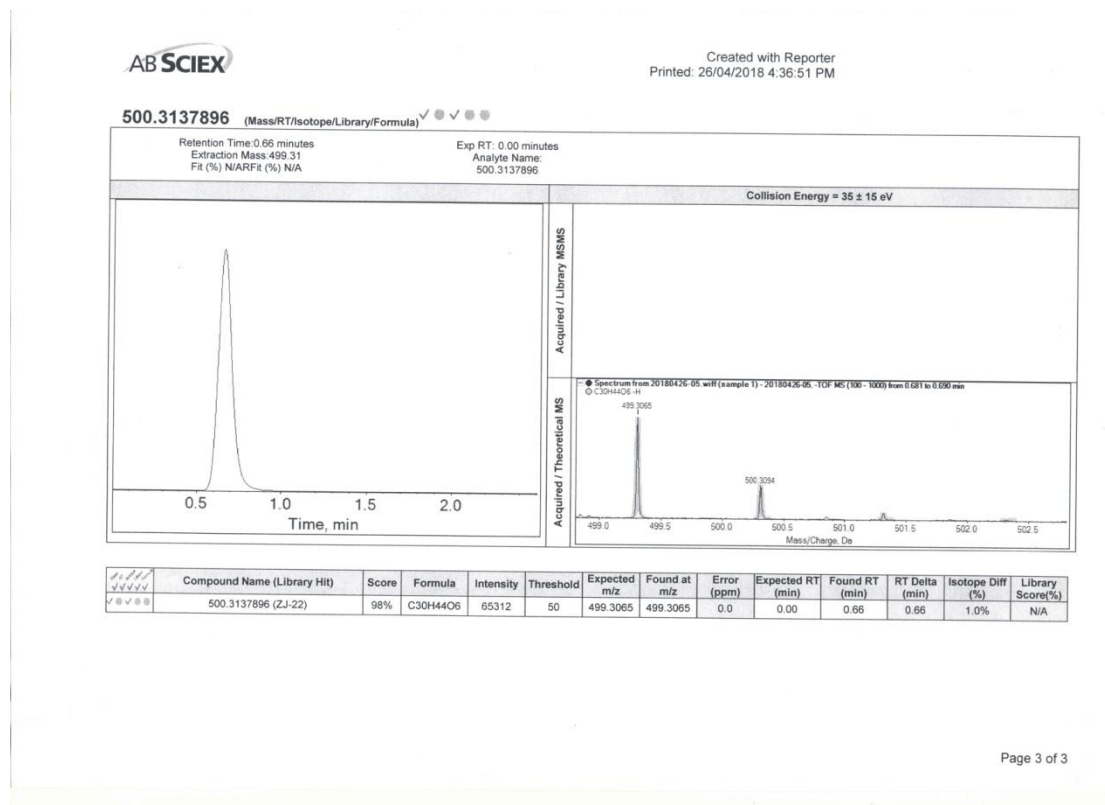

**Fig. S90.**  $^1\text{H}$  NMR spectrum of compound **10** in  $\text{CD}_3\text{OD}$  (400 MHz).

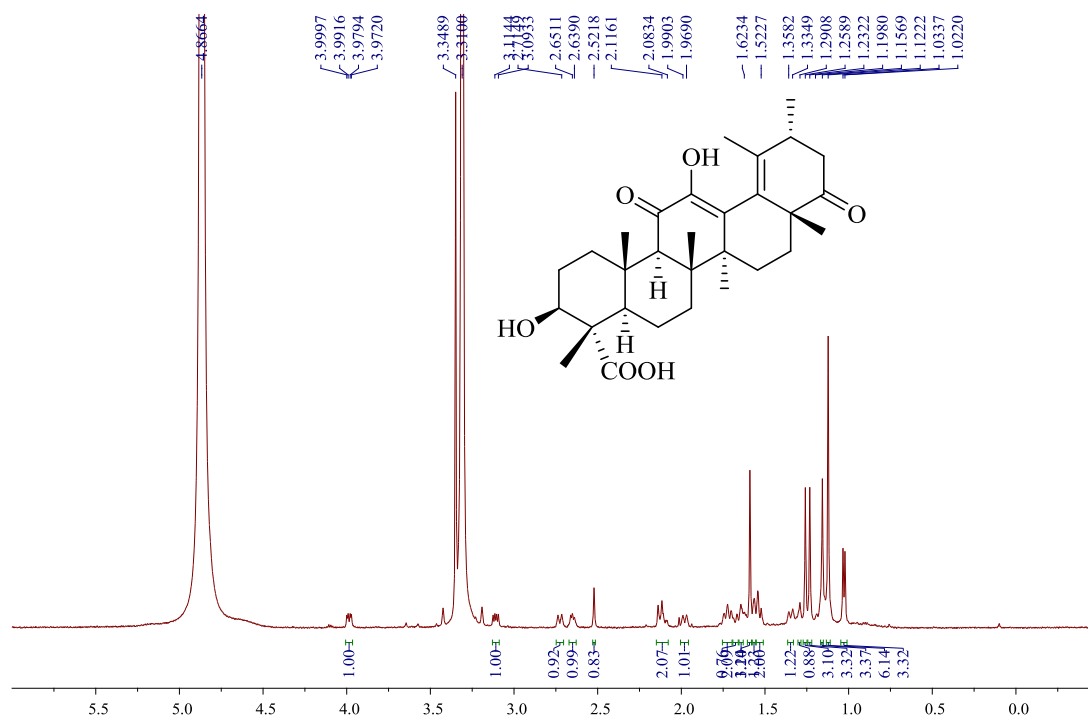

**Fig. S91.**  $^1\text{H}$  NMR spectrum of compound **10**-expansion.

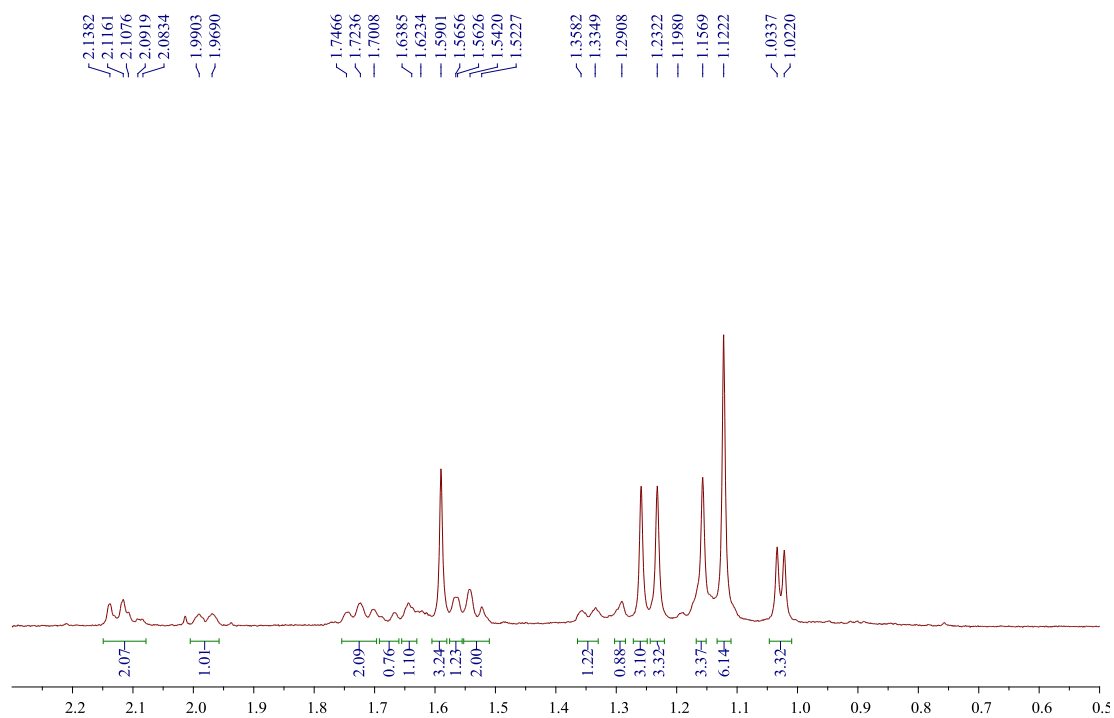



**Fig. S92.**  $^{13}\text{C}$  NMR spectra of compound **10** in  $\text{CD}_3\text{OD}$  (150 MHz).

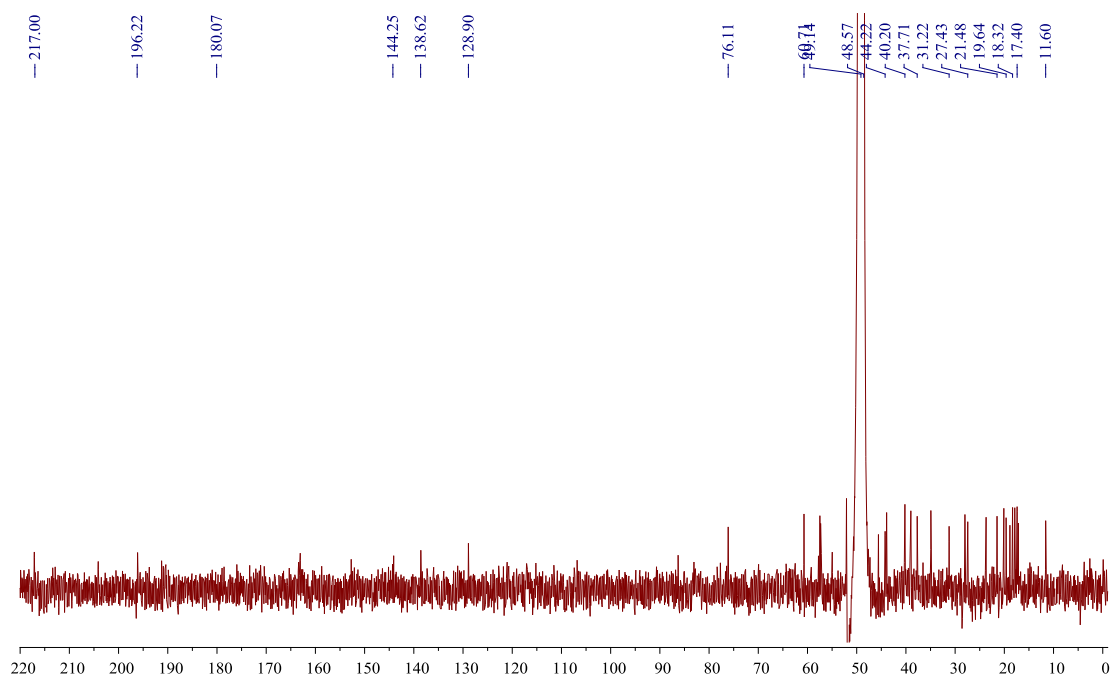

**Fig. S93.** HSQC spectrum of compound **10** in  $\text{CD}_3\text{OD}$  (600 MHz).

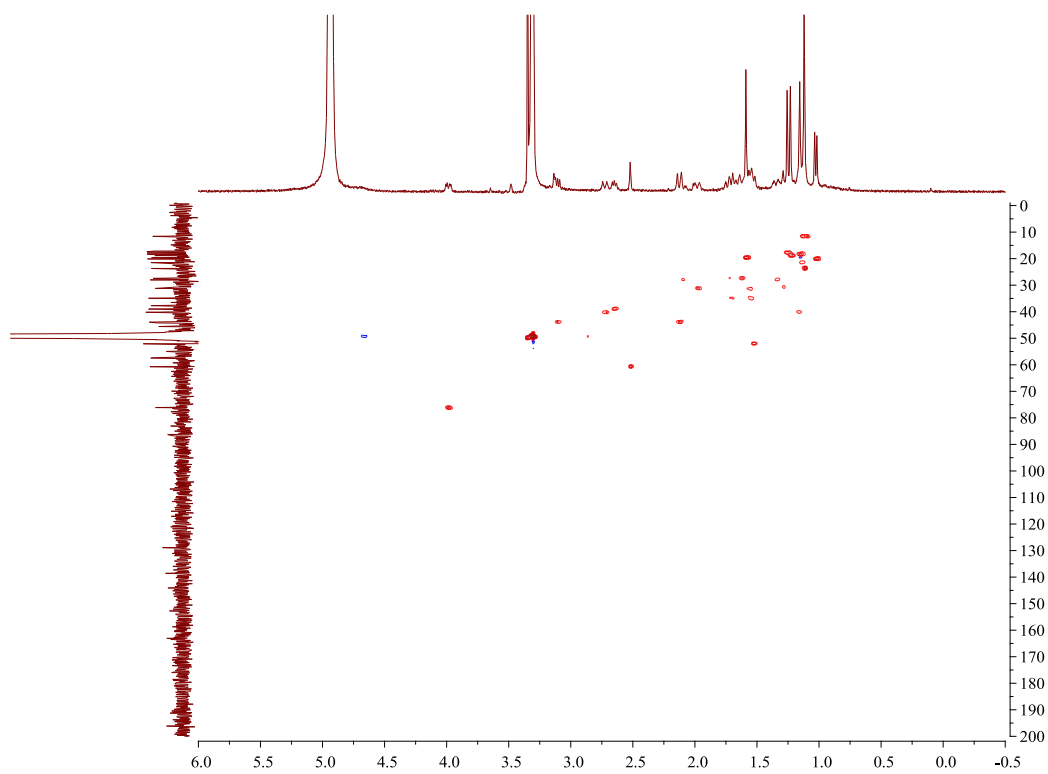

**Fig. S94.** HMBC spectrum of compound **10** in CD<sub>3</sub>OD (600 MHz).

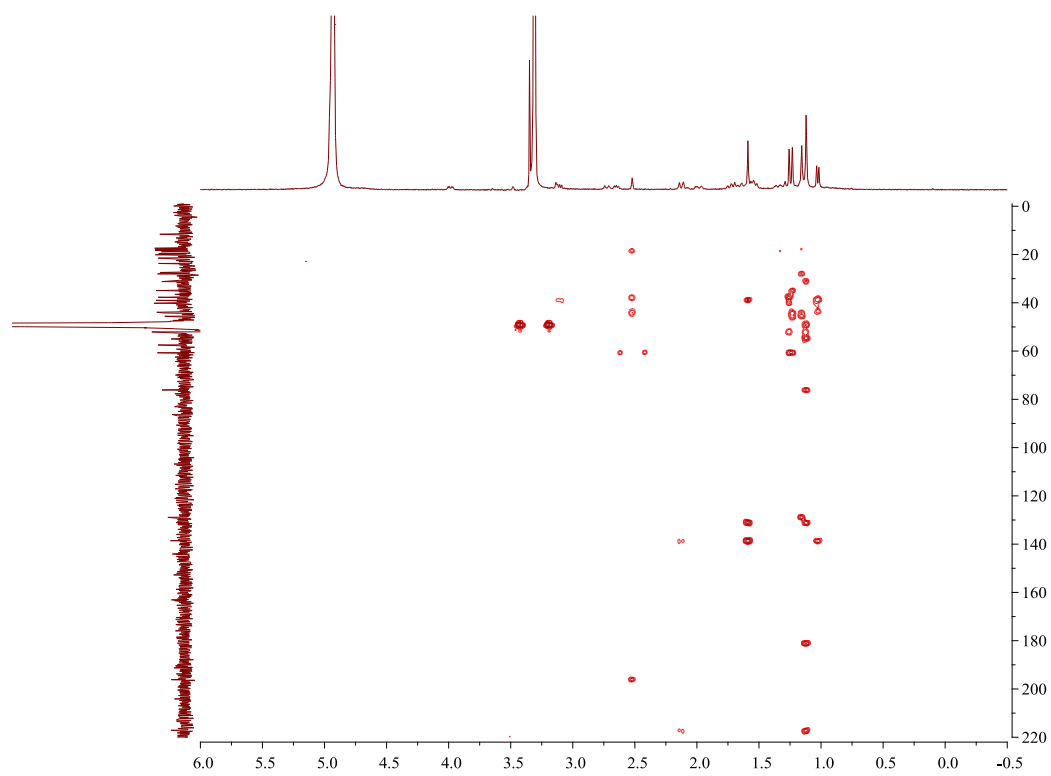

**Fig. S95.** HMBC spectrum of compound **10**—expansion.

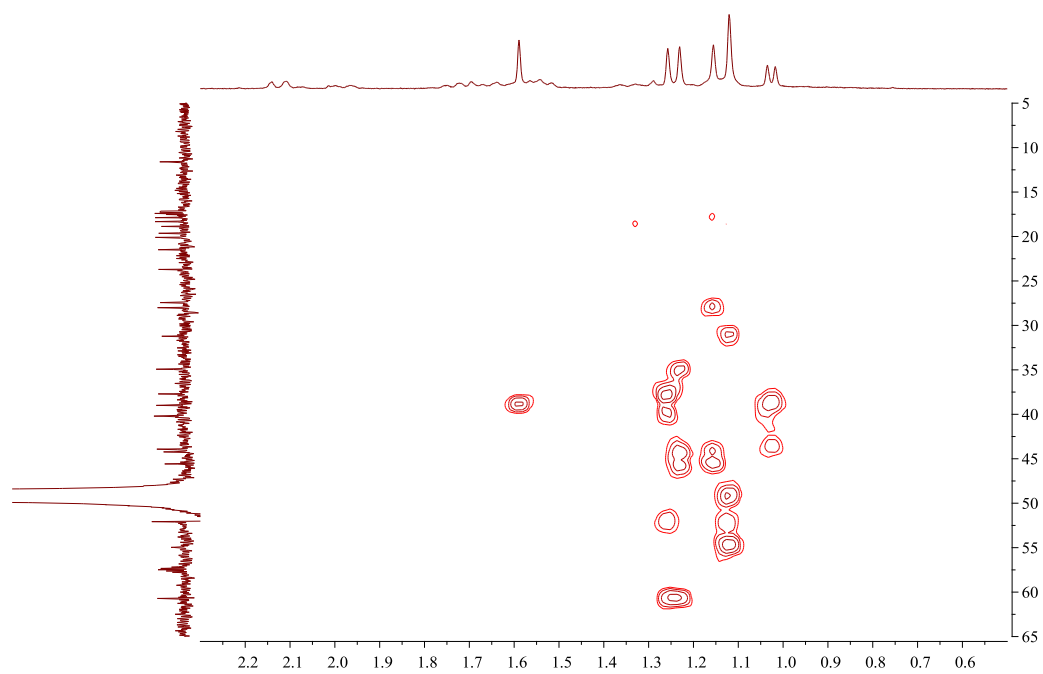

**Fig. S96.** ROESY spectrum of compound **10** in CD<sub>3</sub>OD (600 MHz).

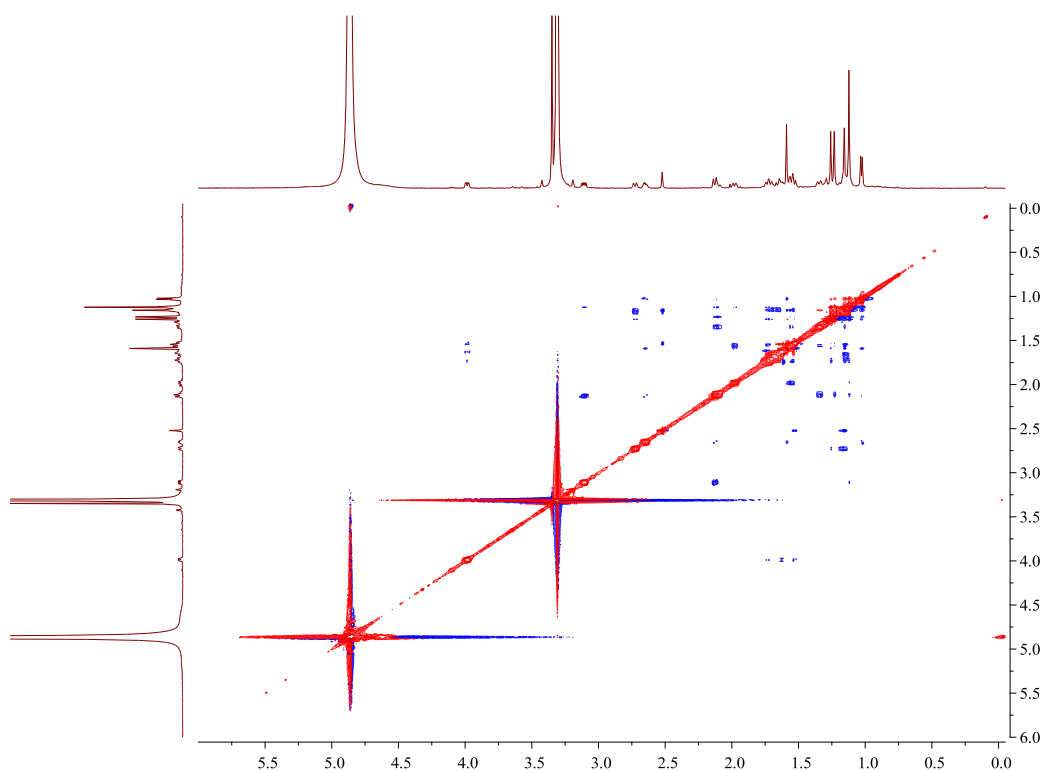

**Fig. S97.** HRESIMS report of compound **10**.

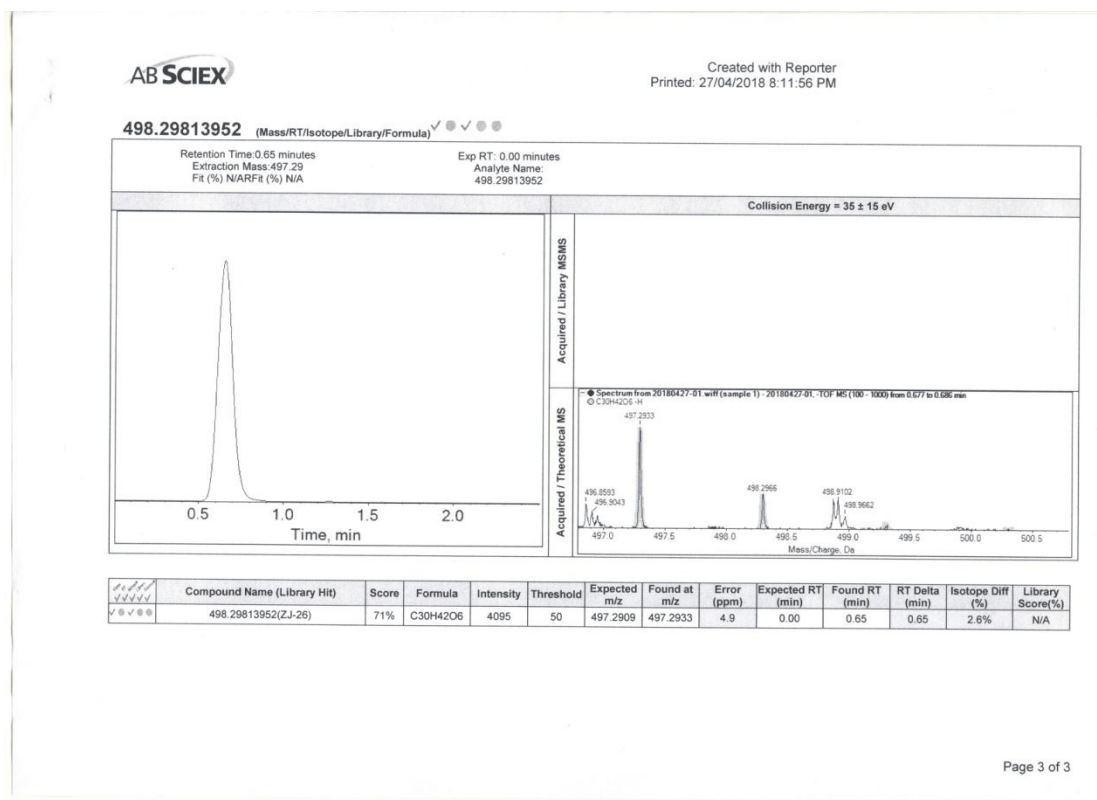

**Fig. S98.**  $^1\text{H}$  NMR spectrum of compound **11** in  $\text{C}_5\text{D}_5\text{N}$  (400 MHz).

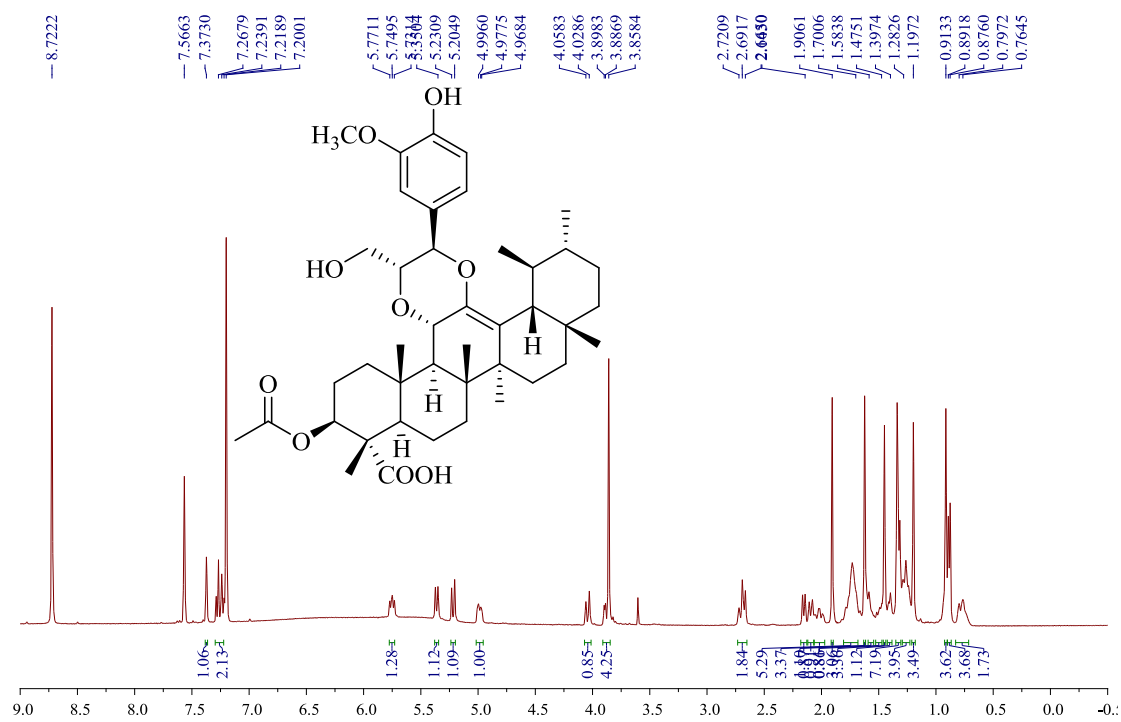

**Fig. S99.**  $^1\text{H}$  NMR spectrum of compound **11**-expansion.

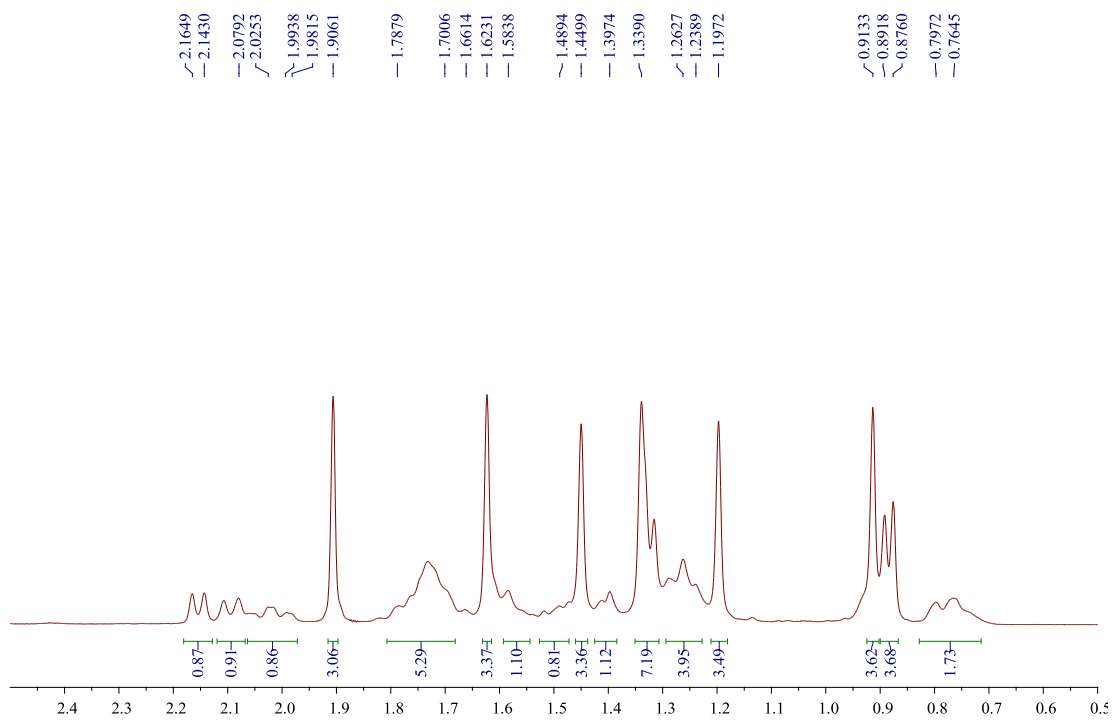

**Fig. S100.**  $^{13}\text{C}$  NMR spectrum of compound **11** in  $\text{C}_5\text{D}_5\text{N}$  (150 MHz).

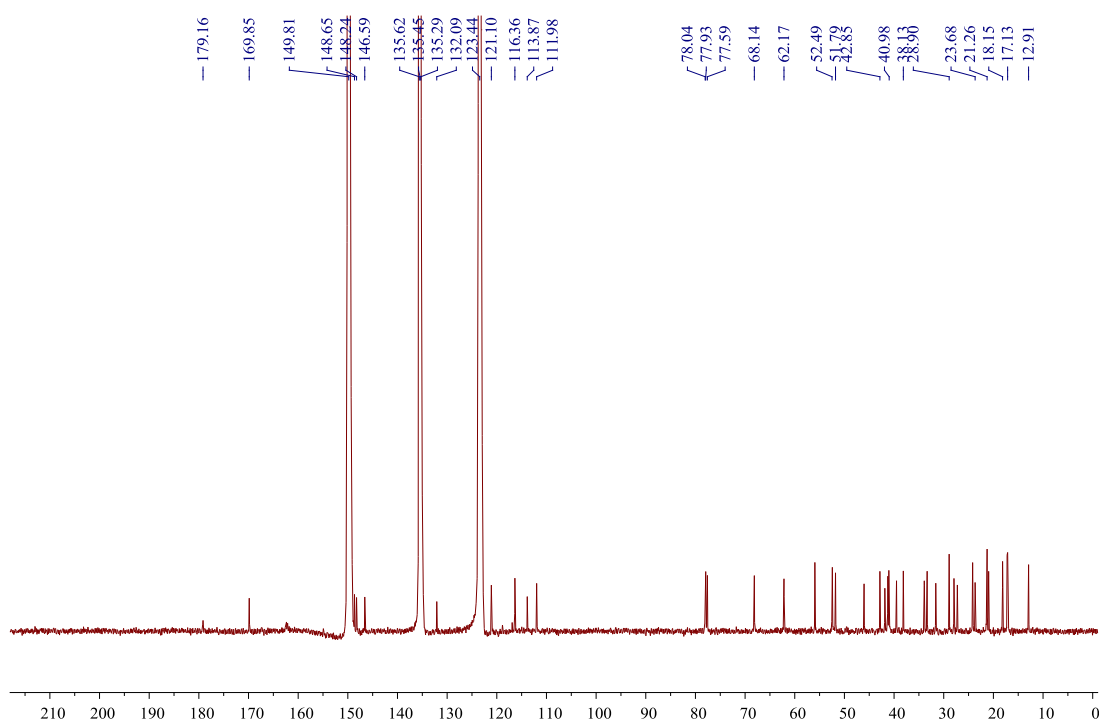

**Fig. S101.**  $^{13}\text{C}$  NMR spectrum of compound **11**-expansion.

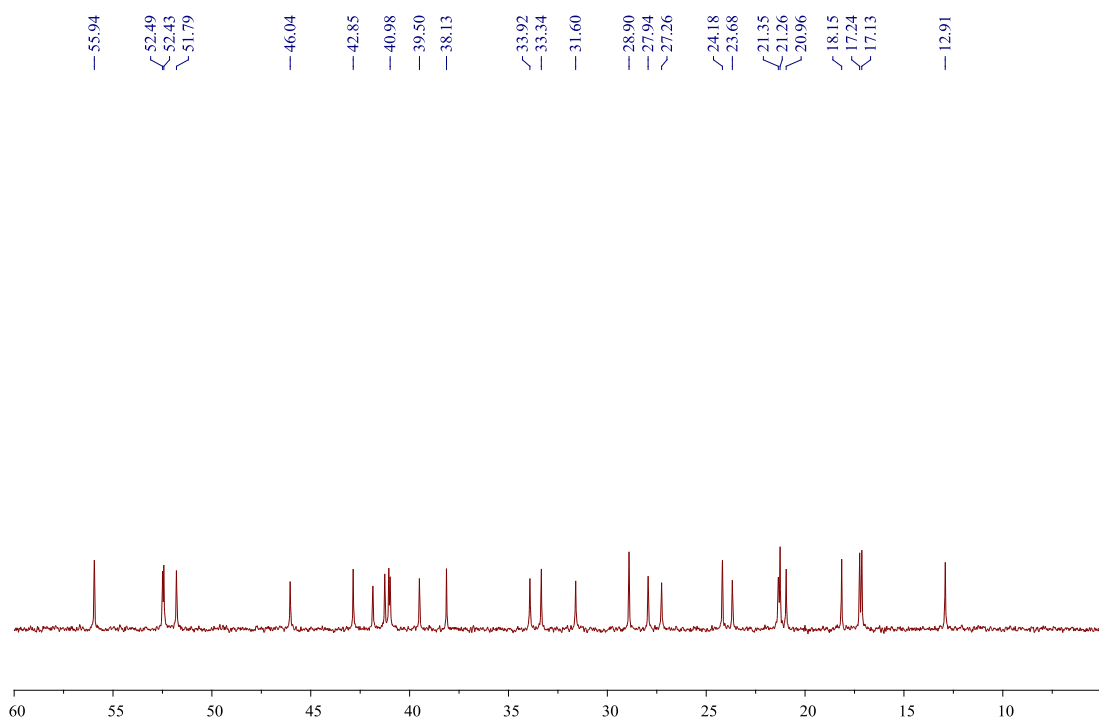

**Fig. S102.** HSQC spectrum of compound **11** in C<sub>5</sub>D<sub>5</sub>N (600 MHz).

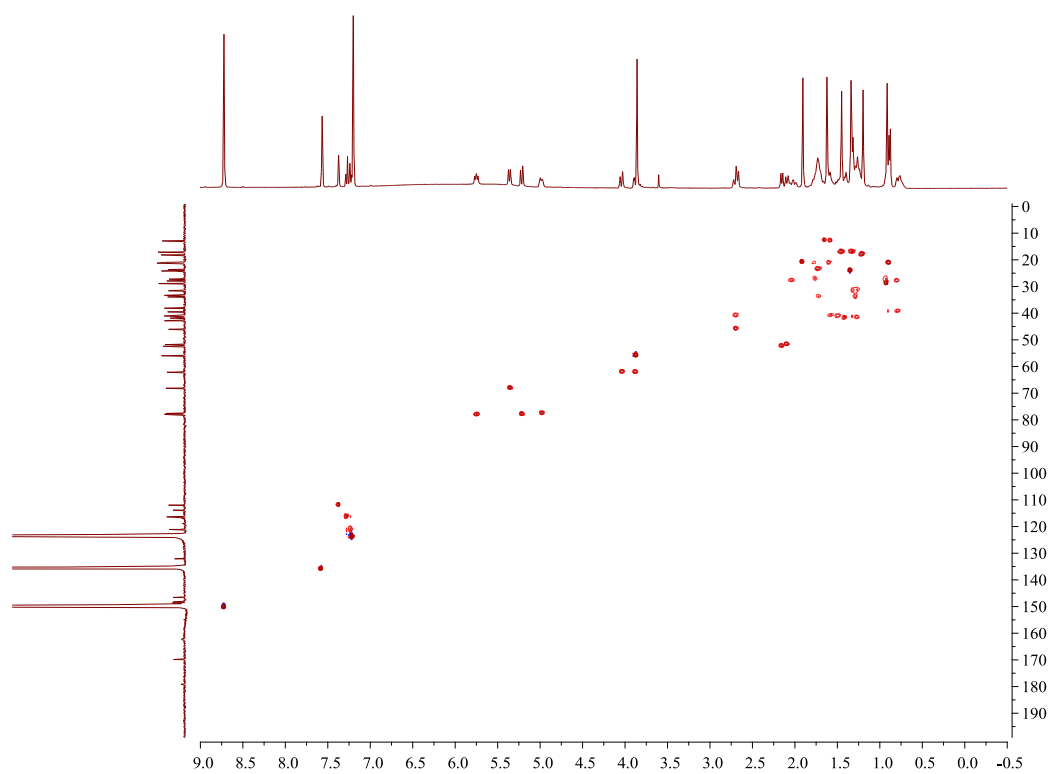

**Fig. S103.** <sup>1</sup>H-<sup>1</sup>H COSY spectrum of compound **11** in C<sub>5</sub>D<sub>5</sub>N (600 MHz).

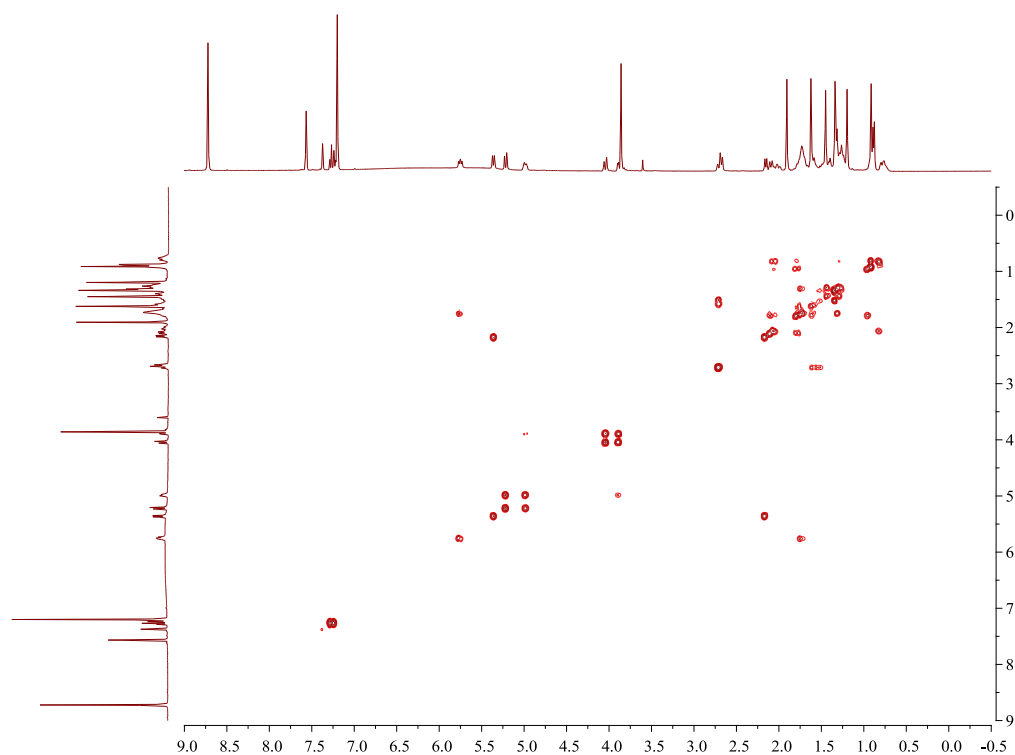

**Fig. S104.** HMBC spectrum of compound **11** in  $C_5D_5N$  (600 MHz).

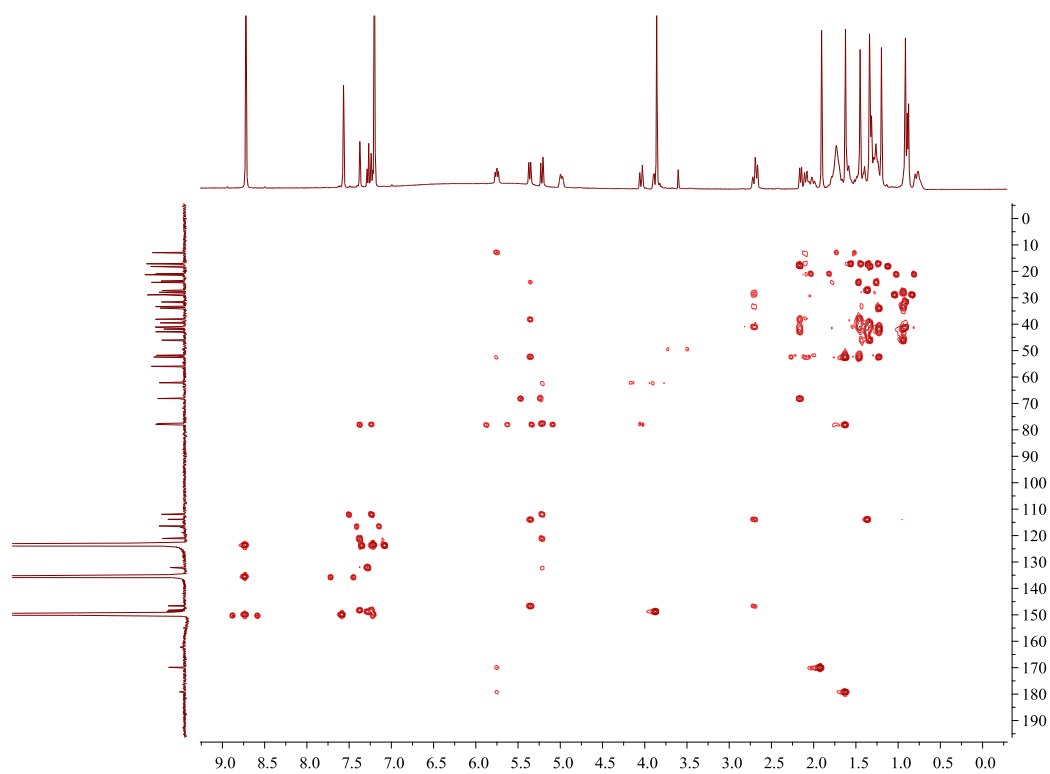

**Fig. S105.** HMBC spectrum of compound **11** –expansion.

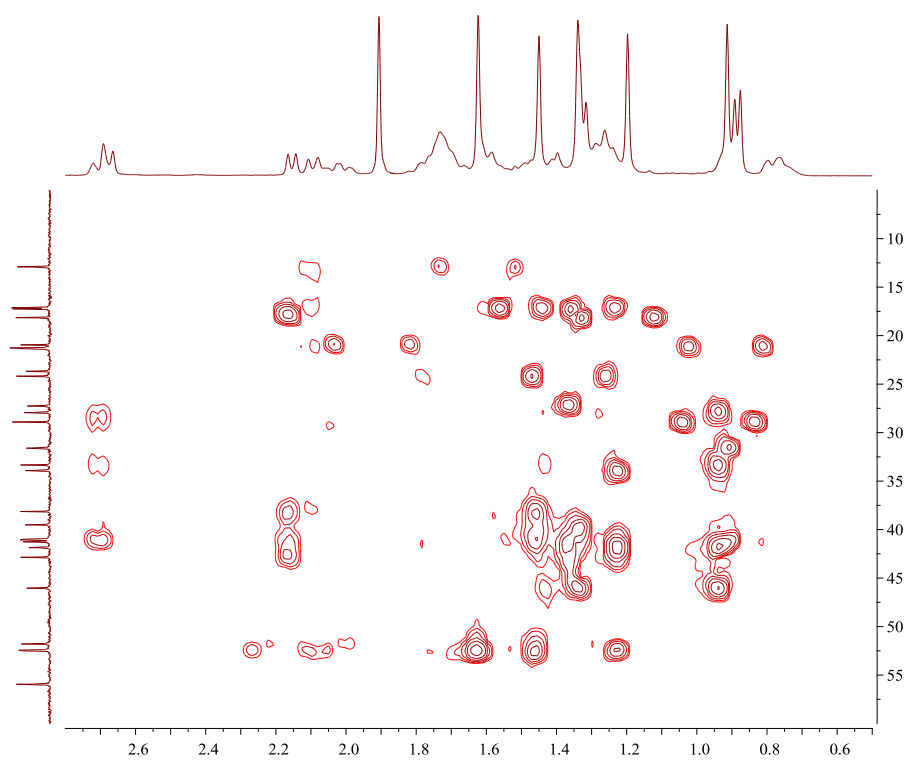

**Fig. S106.** ROESY spectrum of compound **11** in C<sub>5</sub>D<sub>5</sub>N (600 MHz).

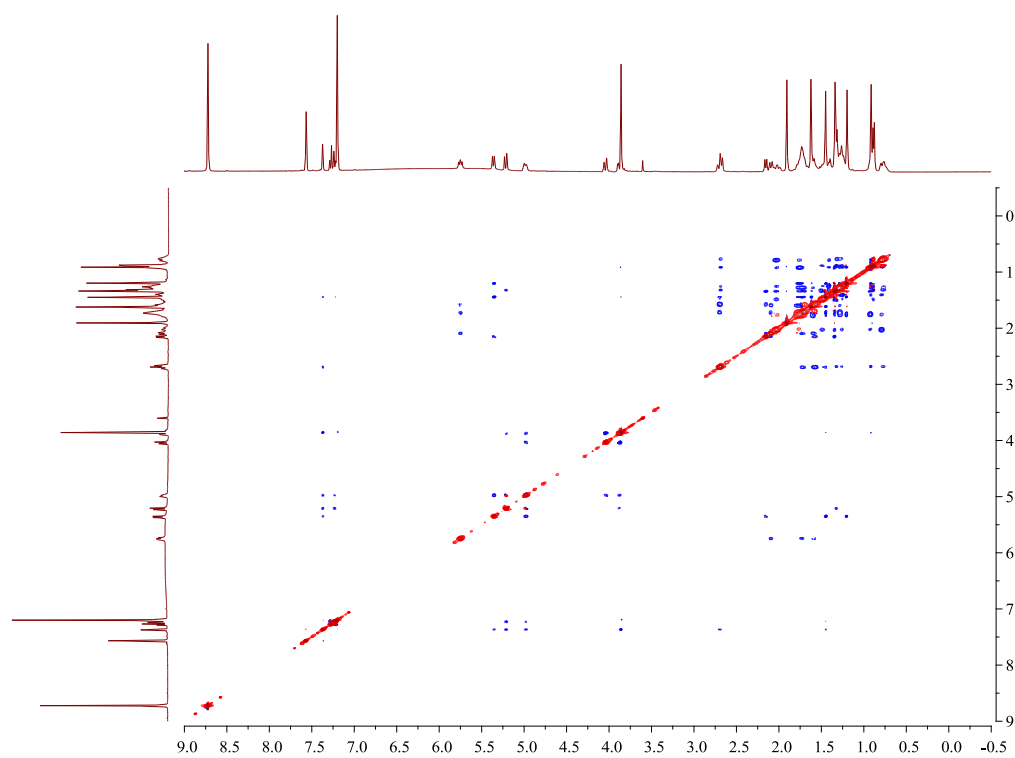

**Fig. S107.** ROESY spectrum of compound **11** –expansion.

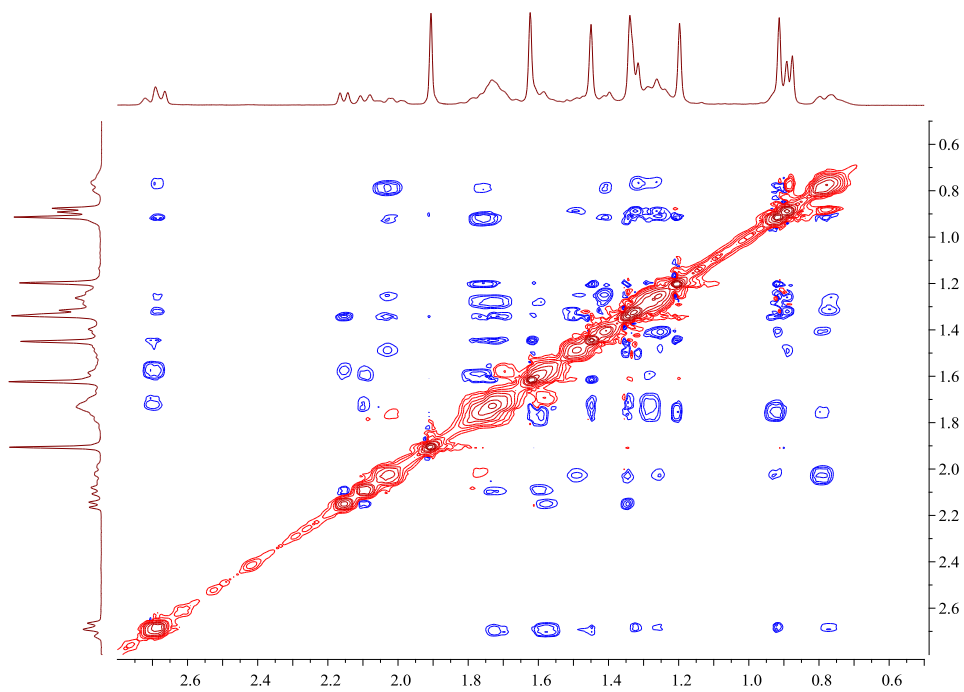



**Fig. S108.** HRESIMS report of compound **11**.

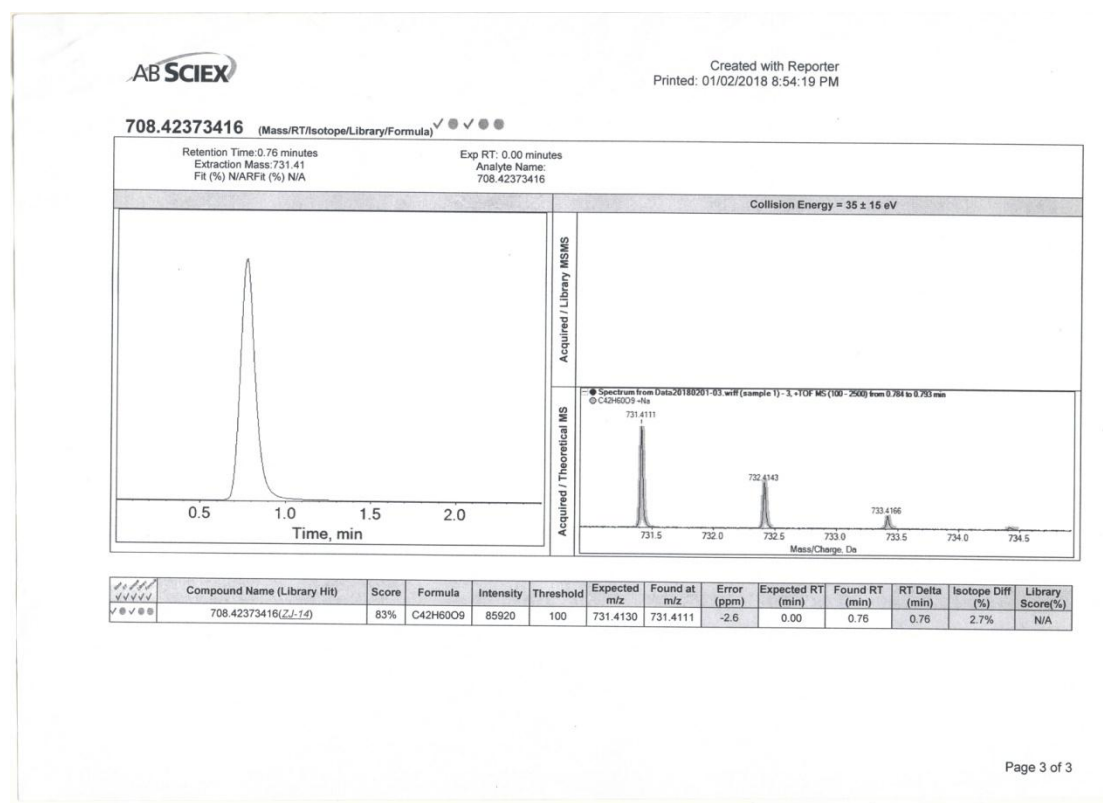

**Fig. S109.**  $^1\text{H}$  NMR spectrum of compound **12** in  $\text{C}_5\text{D}_5\text{N}$  (400 MHz).

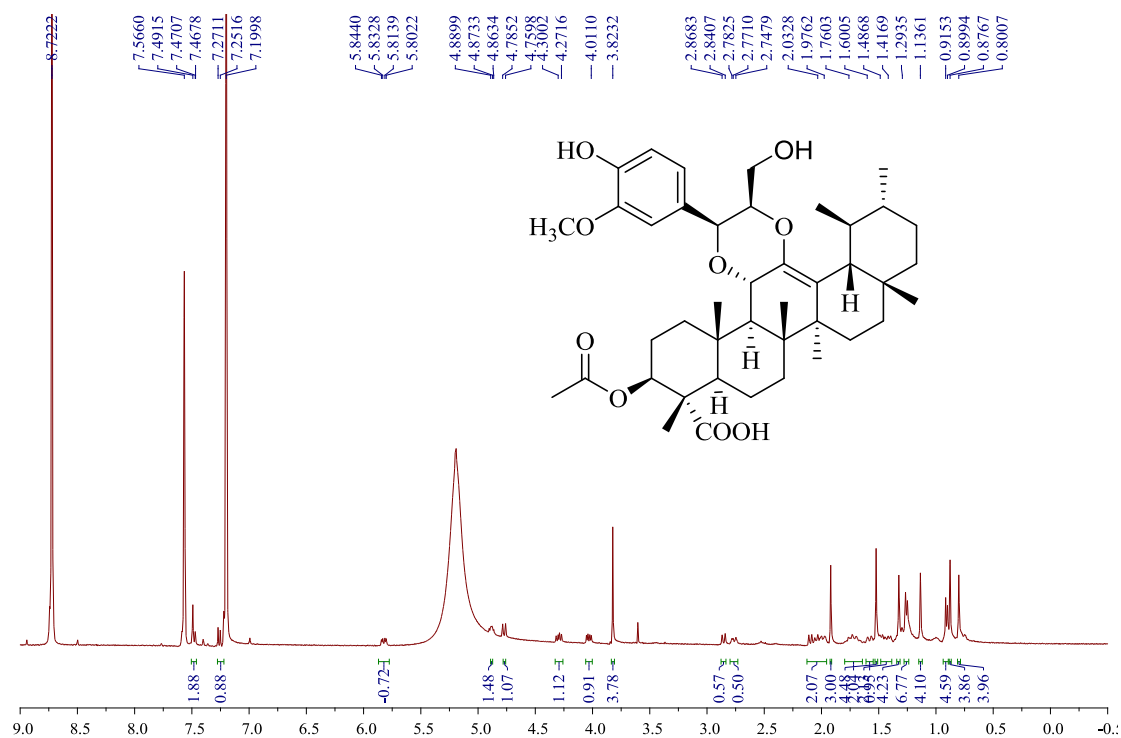

**Fig. S110.**  $^1\text{H}$  NMR spectrum of compound **12**—expansion.

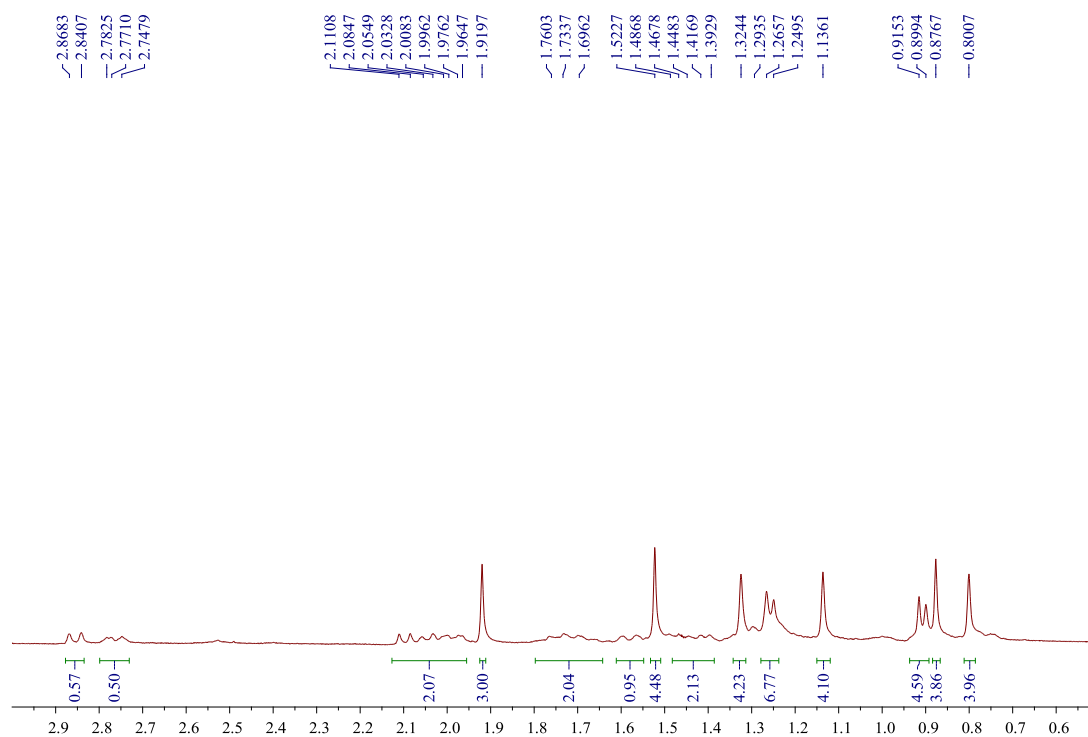

**Fig. S111.**  $^{13}\text{C}$  NMR spectrum of compound **12** in  $\text{C}_5\text{D}_5\text{N}$  (150 MHz).

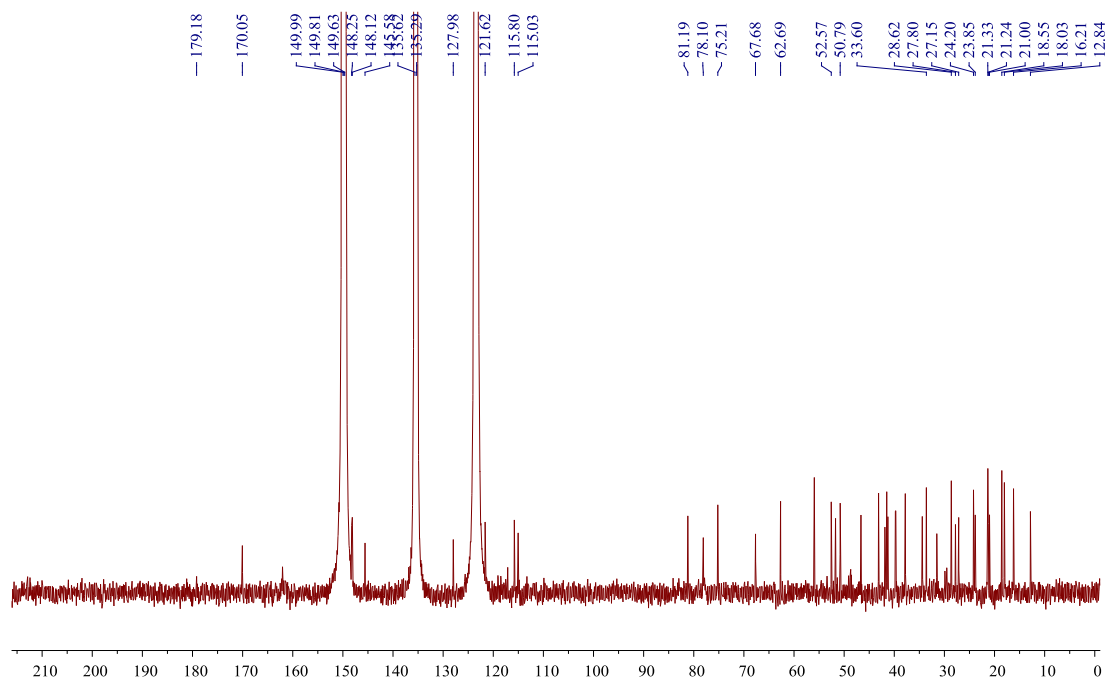

**Fig. S112.**  $^{13}\text{C}$  NMR spectrum of compound **12**—expansion.

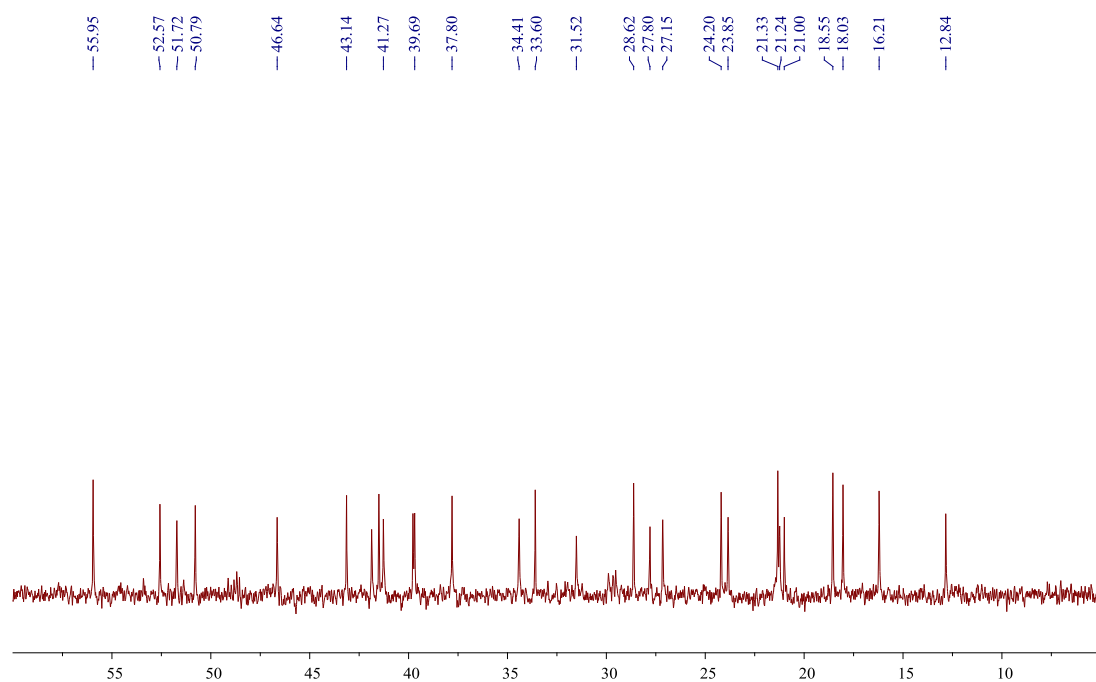

**Fig. S113.**  $^1\text{H}$ - $^1\text{H}$  COSY spectrum of compound **12** in  $\text{C}_5\text{D}_5\text{N}$  (600 MHz).

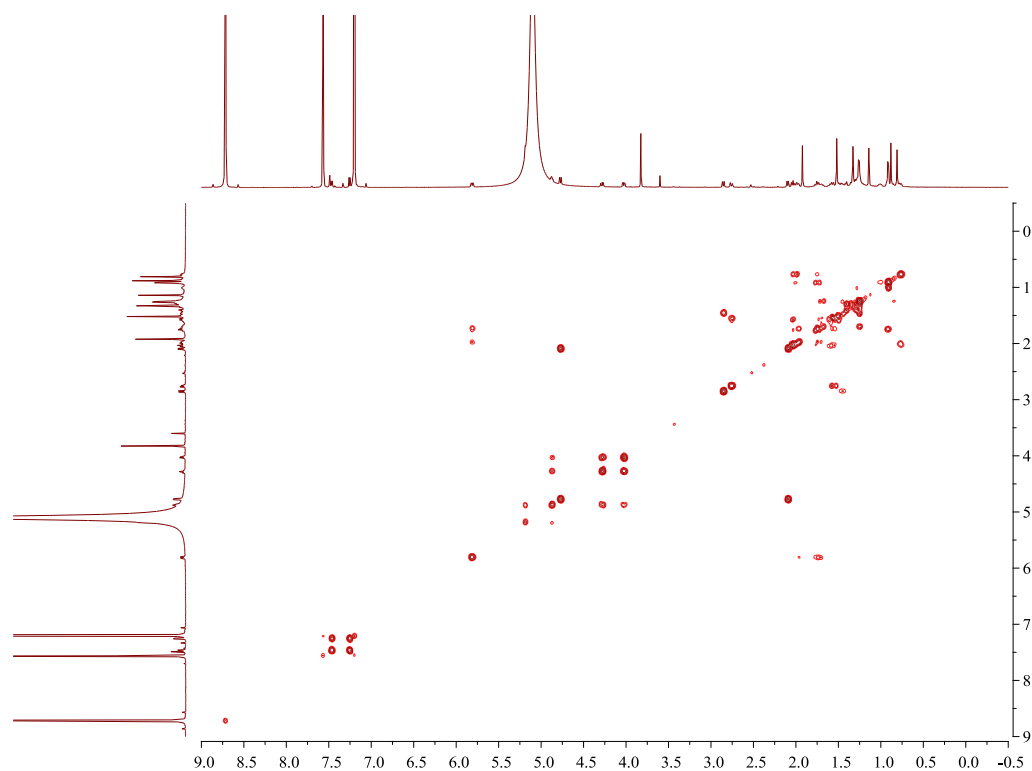

**Fig. S114.** HMBC spectrum of compound **12** in C<sub>5</sub>D<sub>5</sub>N (600 MHz).

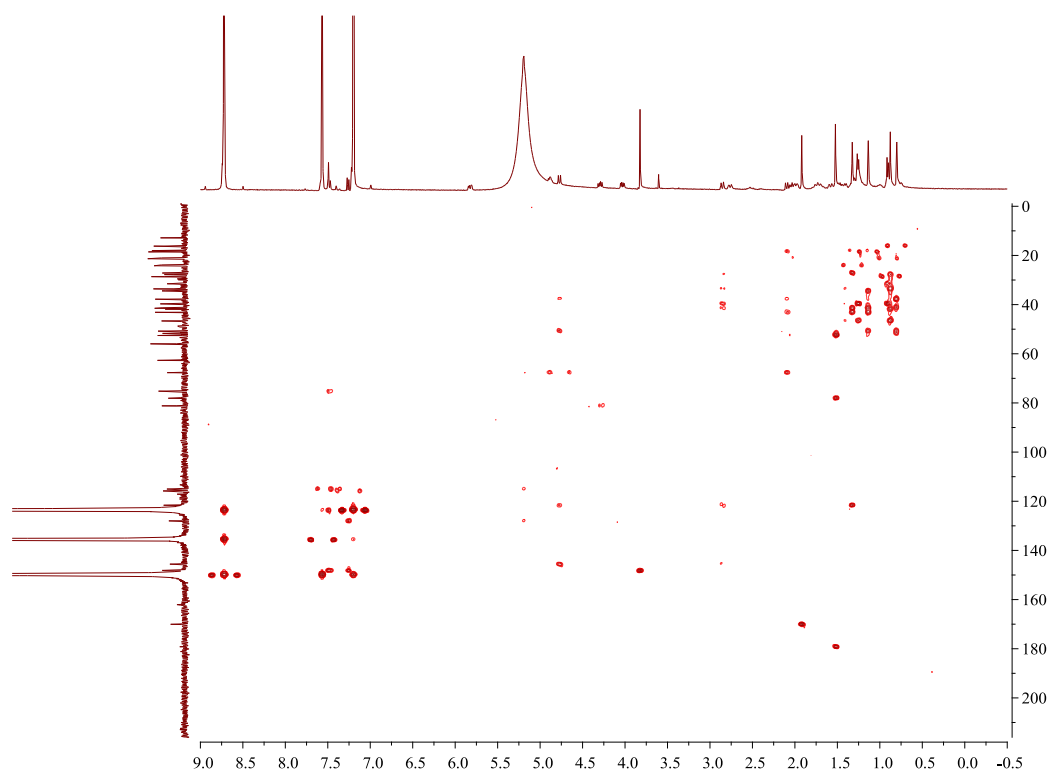

**Fig. S115.** ROESY spectrum of compound **12** in C<sub>5</sub>D<sub>5</sub>N (600 MHz).

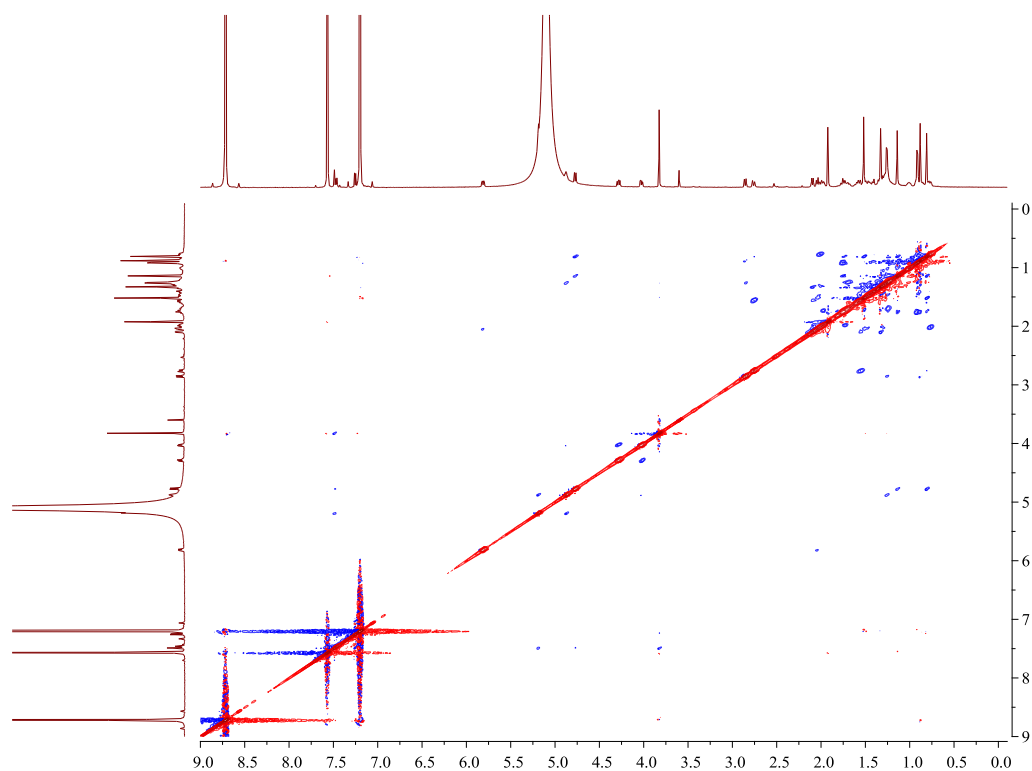

**Fig. S116.** HRESIMS report of compound **12**.

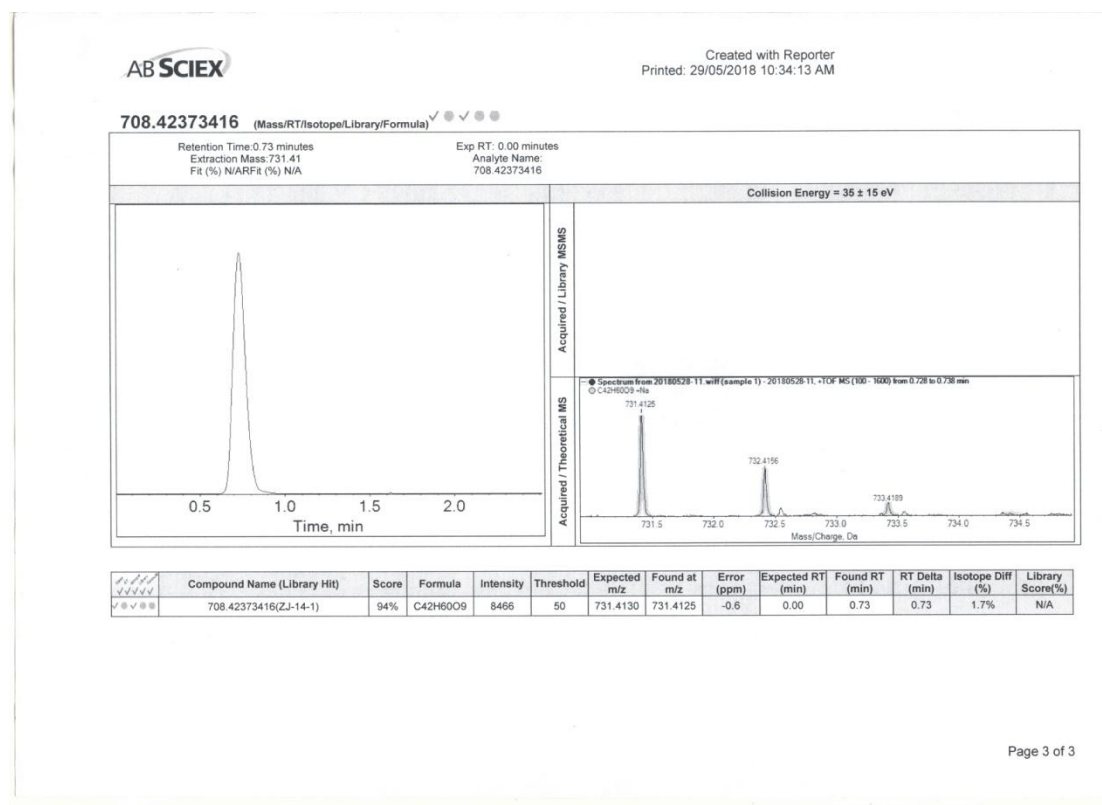

**Fig. S117.** <sup>1</sup>H NMR spectrum of compound **13** in CD<sub>3</sub>OD (400 MHz)

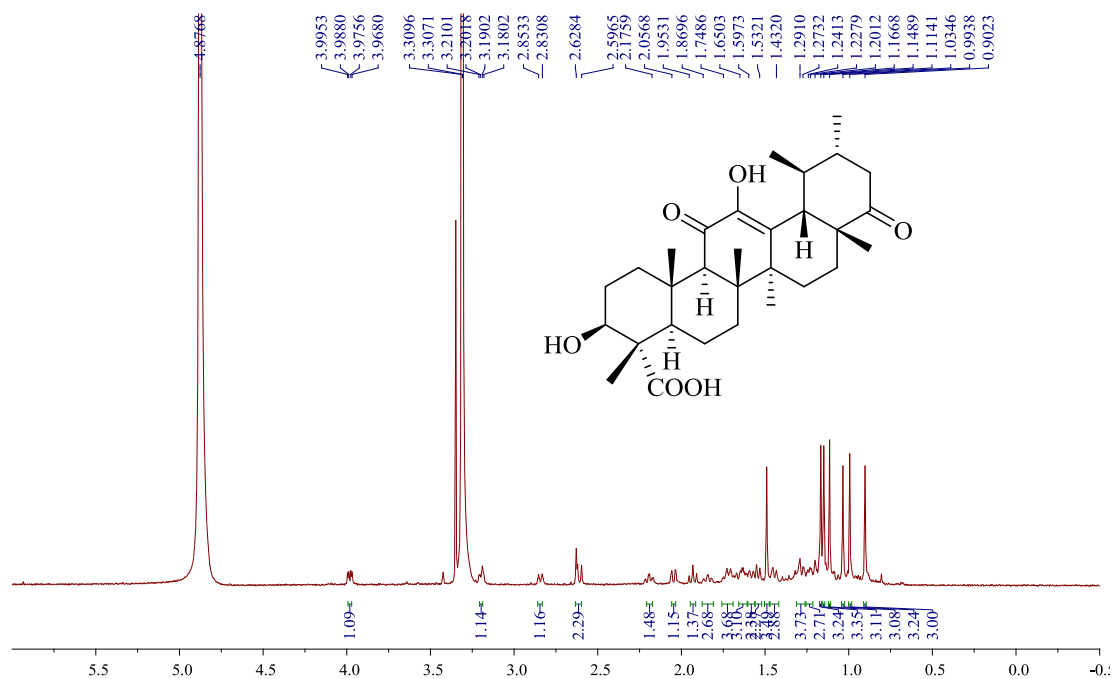

**Fig. S118.**  $^1\text{H}$  NMR spectrum of compound **13** –expansion

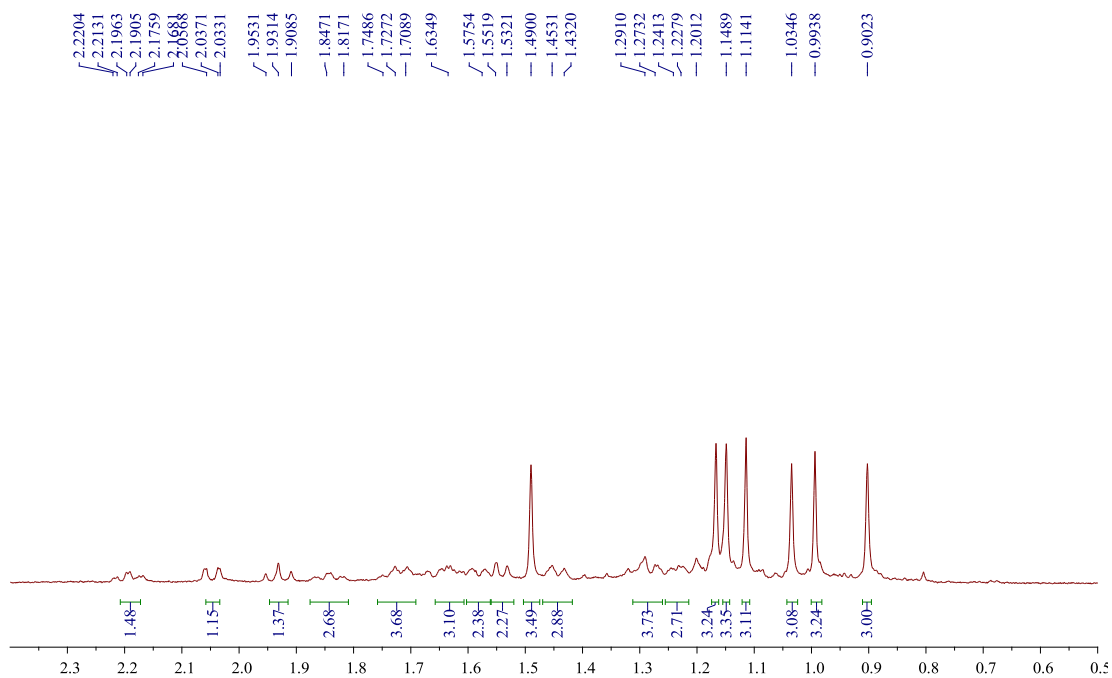

**Fig. S119.**  $^{13}\text{C}$  NMR spectrum of compound **13** in  $\text{CD}_3\text{OD}$  (150 MHz)

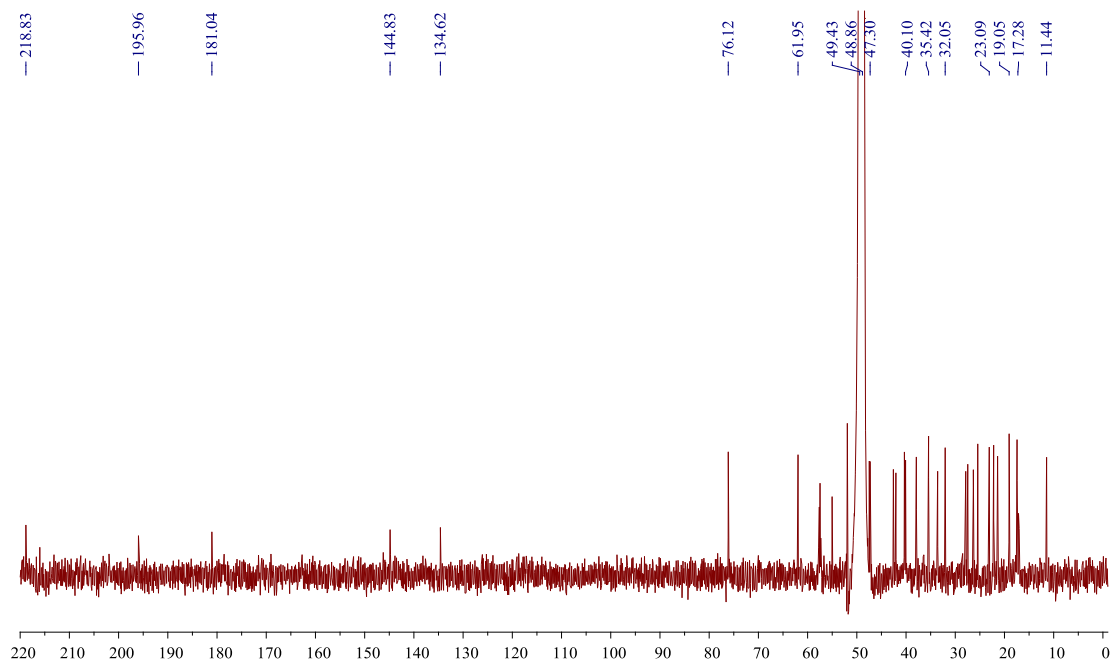

**Fig. S120.**  $^{13}\text{C}$  NMR spectrum of compound **13**—expansion

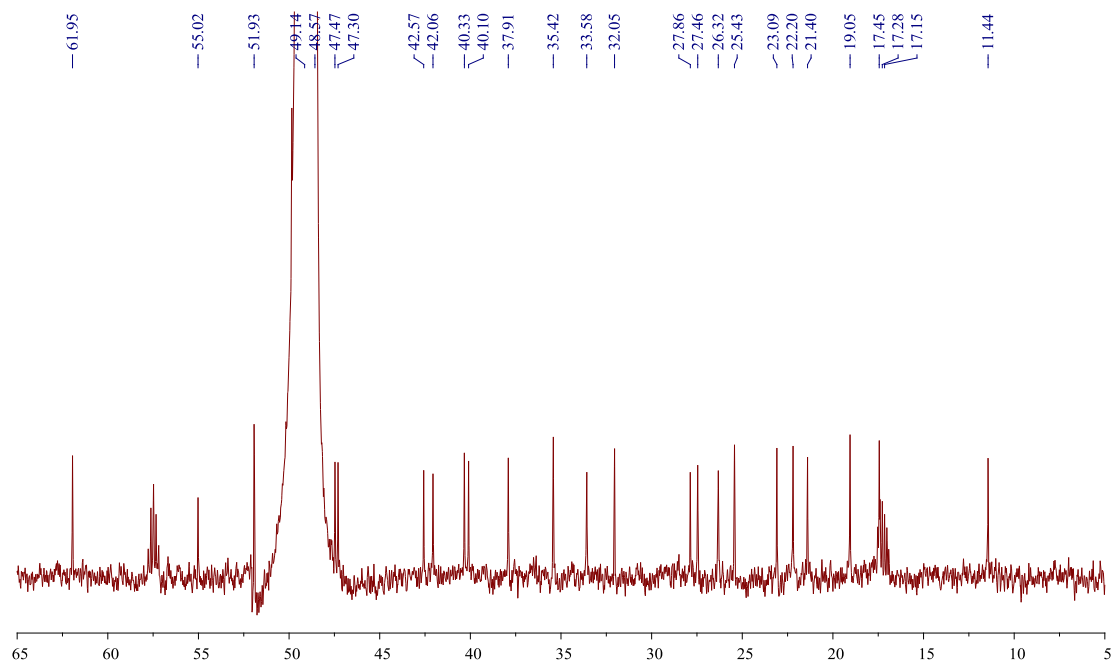

**Fig. S121.** HMBC spectrum of compound **13** in  $\text{CD}_3\text{OD}$  (600 MHz)

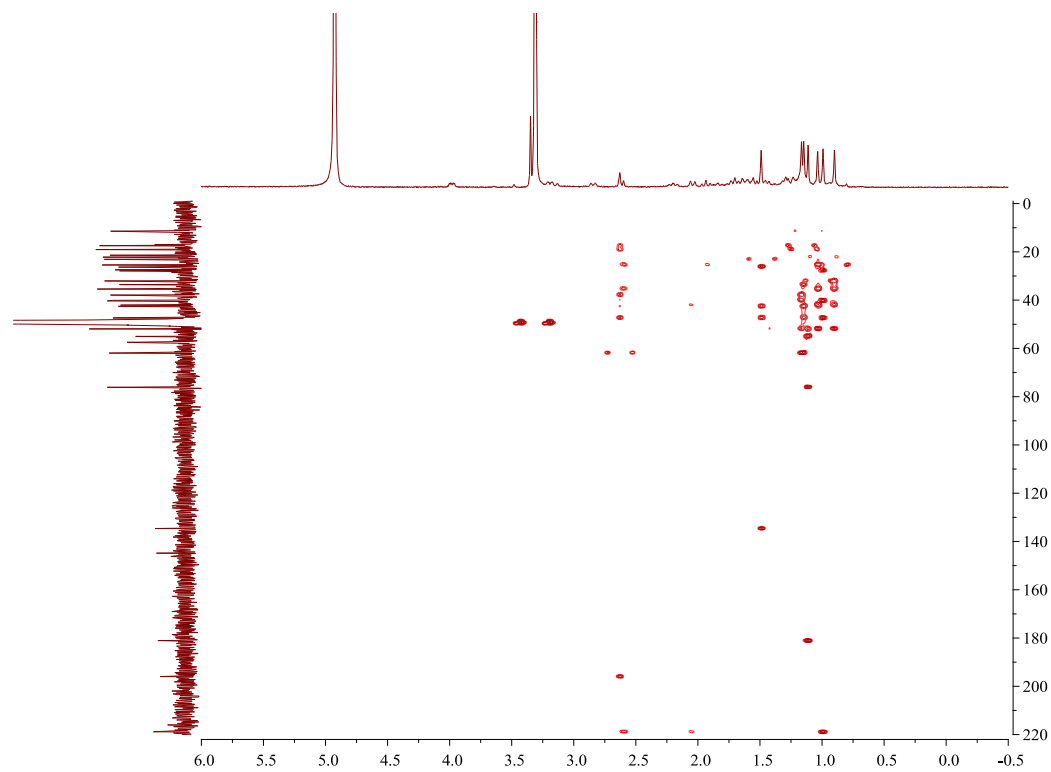

**Fig. S122.** HMBC spectrum of compound **13**-expansion

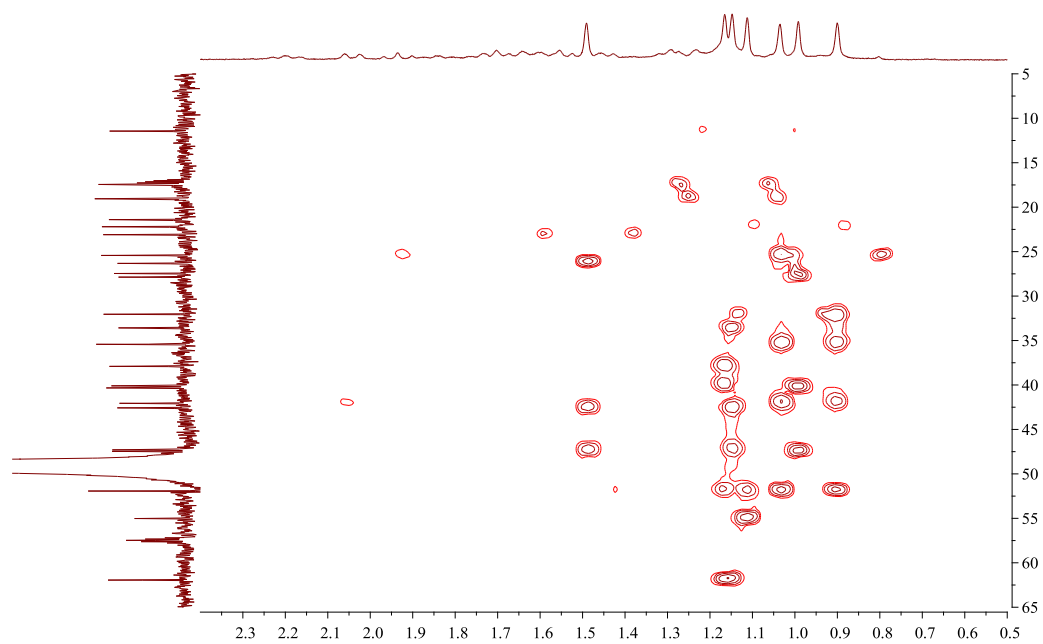

**Fig. S123.** ROESY spectrum of compound **13** in  $\text{CD}_3\text{OD}$  (600 MHz)

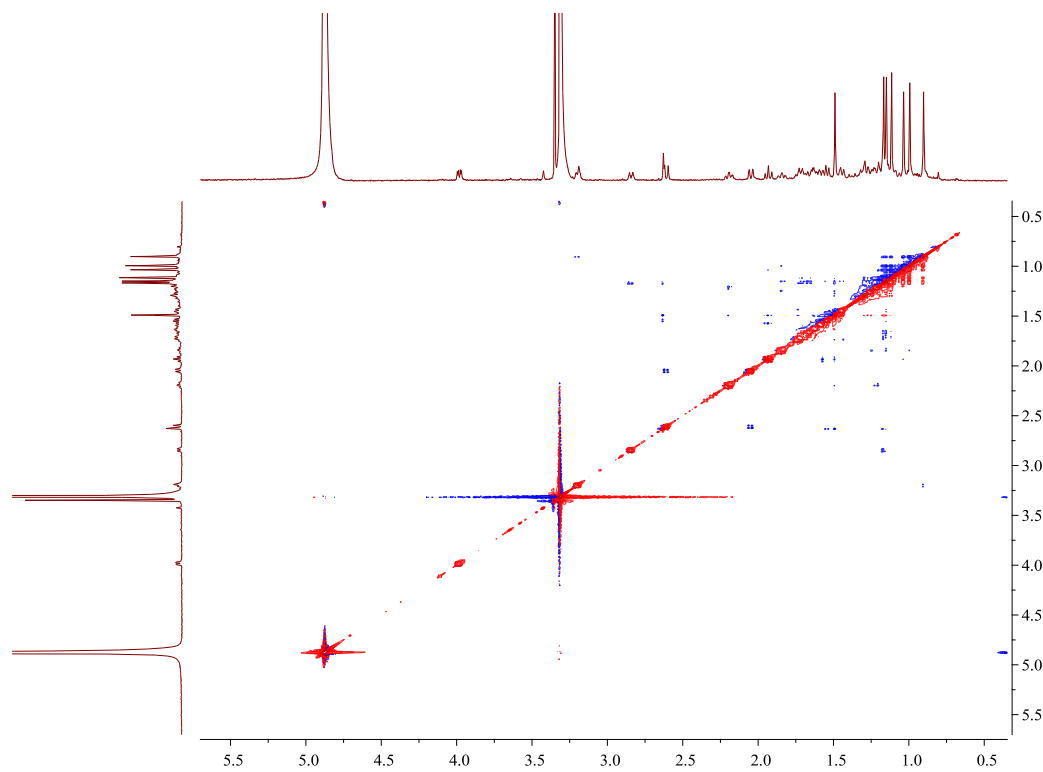



**Fig. S124.** HR-ESIMS report of compound **13**

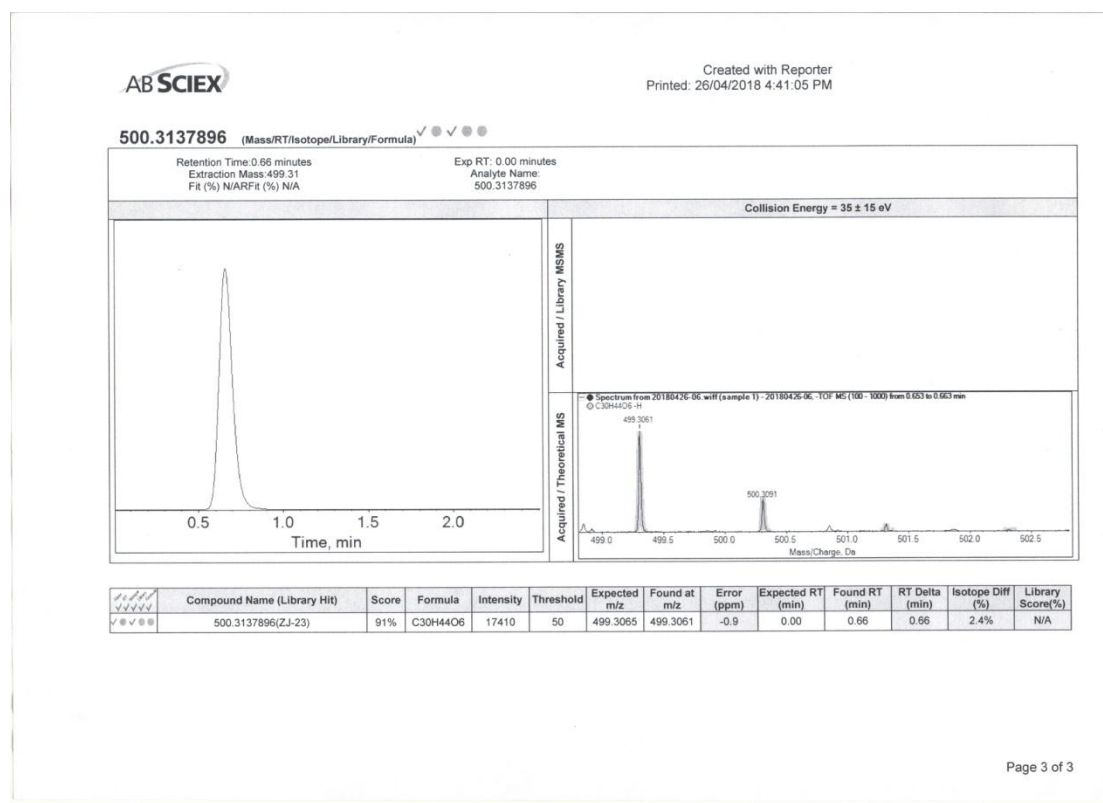

**Fig. S125.**  $^1\text{H}$  NMR spectrum of compound **14** in  $\text{C}_5\text{D}_5\text{N}$  (400 MHz).

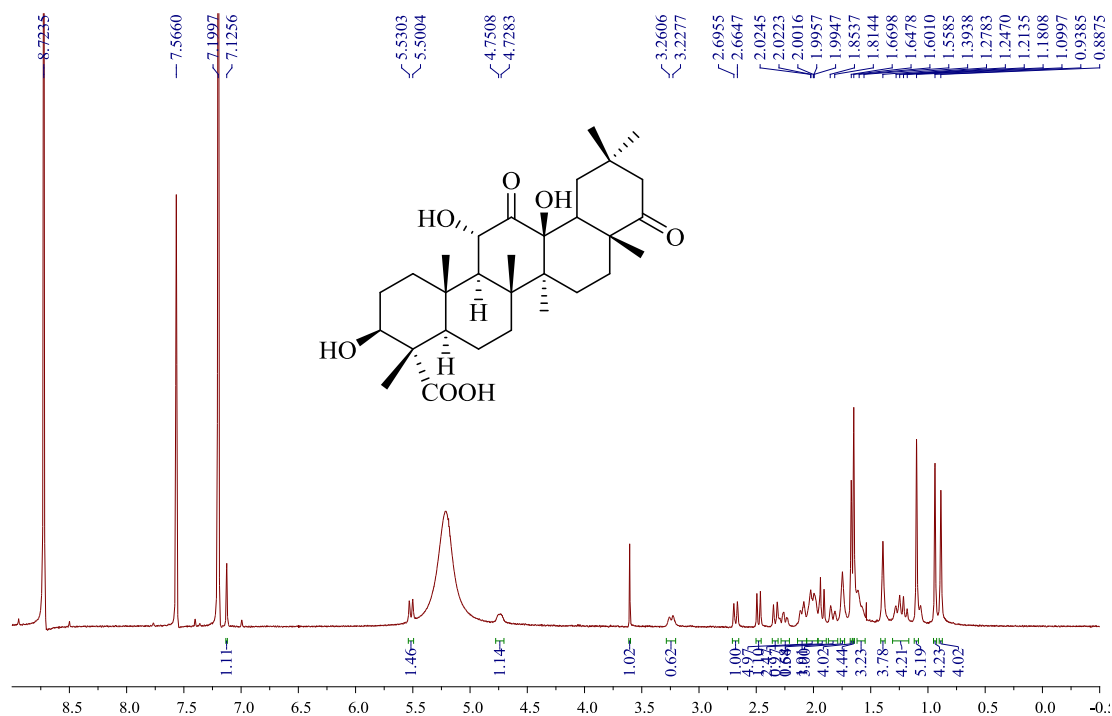

**Fig. S126.**  $^1\text{H}$  NMR spectrum of compound **14**—expansion.

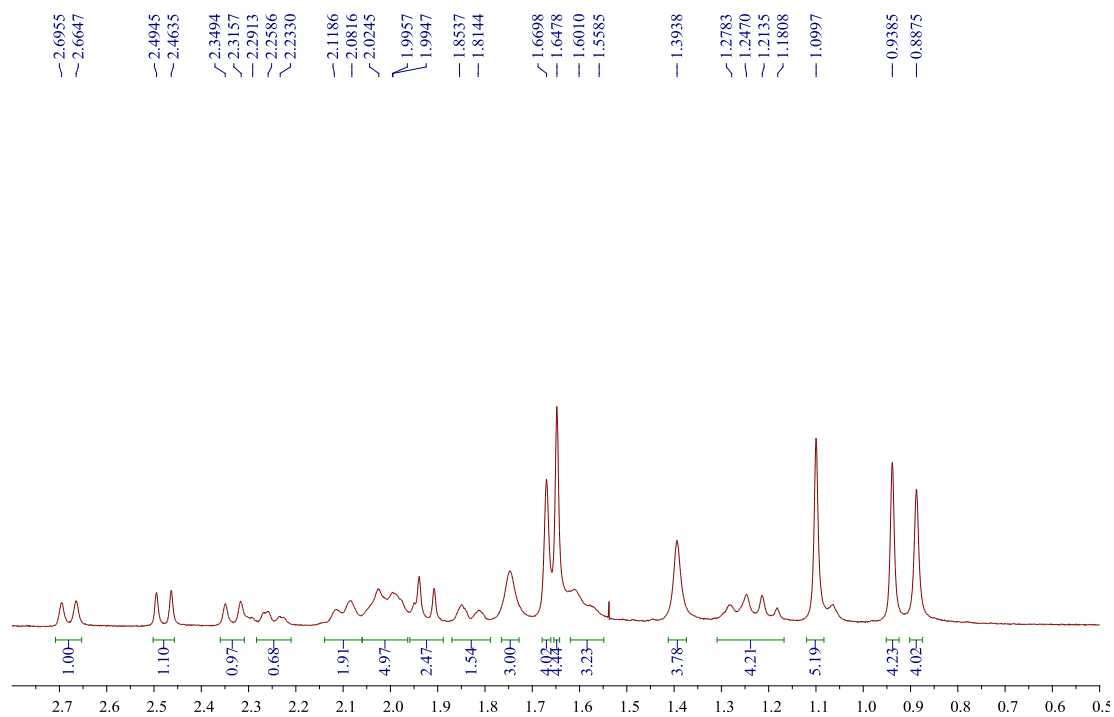

**Fig. S127.**  $^{13}\text{C}$  NMR spectrum of compound **14** in  $\text{C}_5\text{D}_5\text{N}$  (150 MHz).

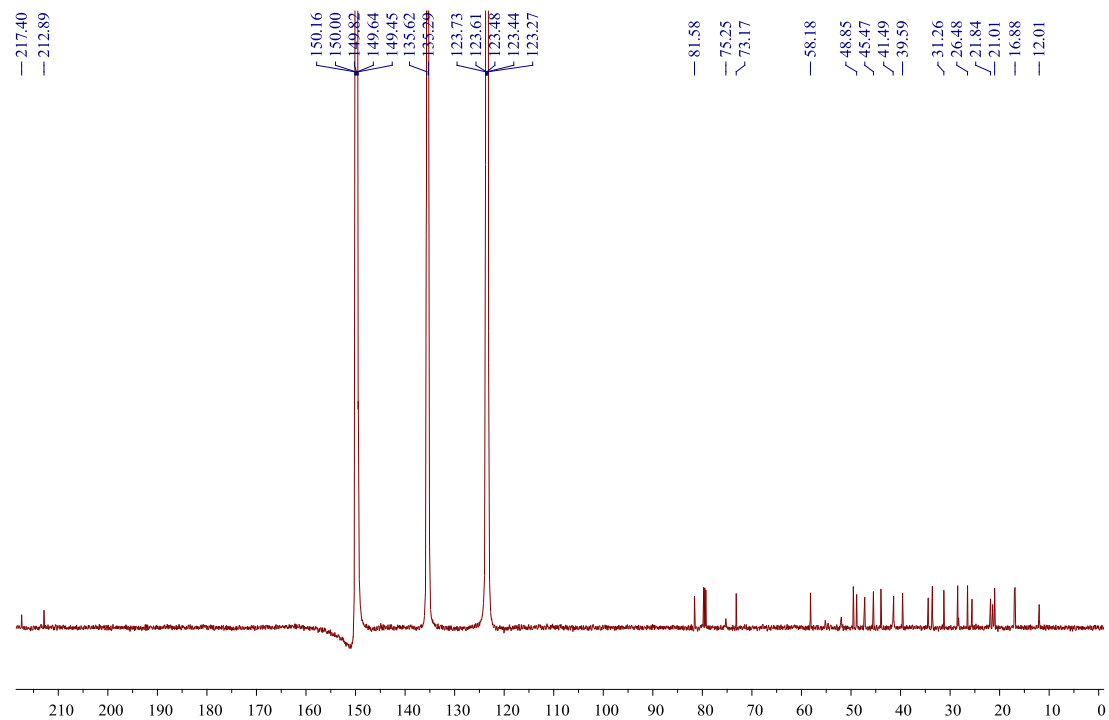

**Fig. S128.**  $^{13}\text{C}$  NMR spectrum of compound **14**-expansion.

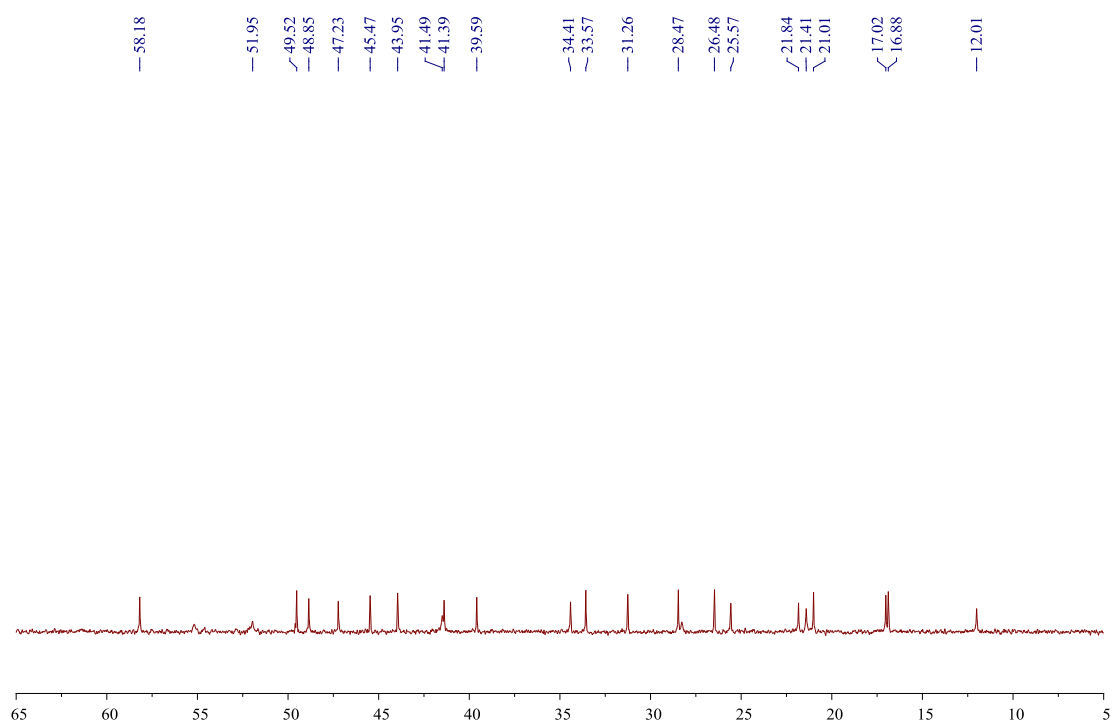

**Fig. S129.** HMBC spectrum of compound **14** in  $\text{C}_5\text{D}_5\text{N}$  (600 MHz).

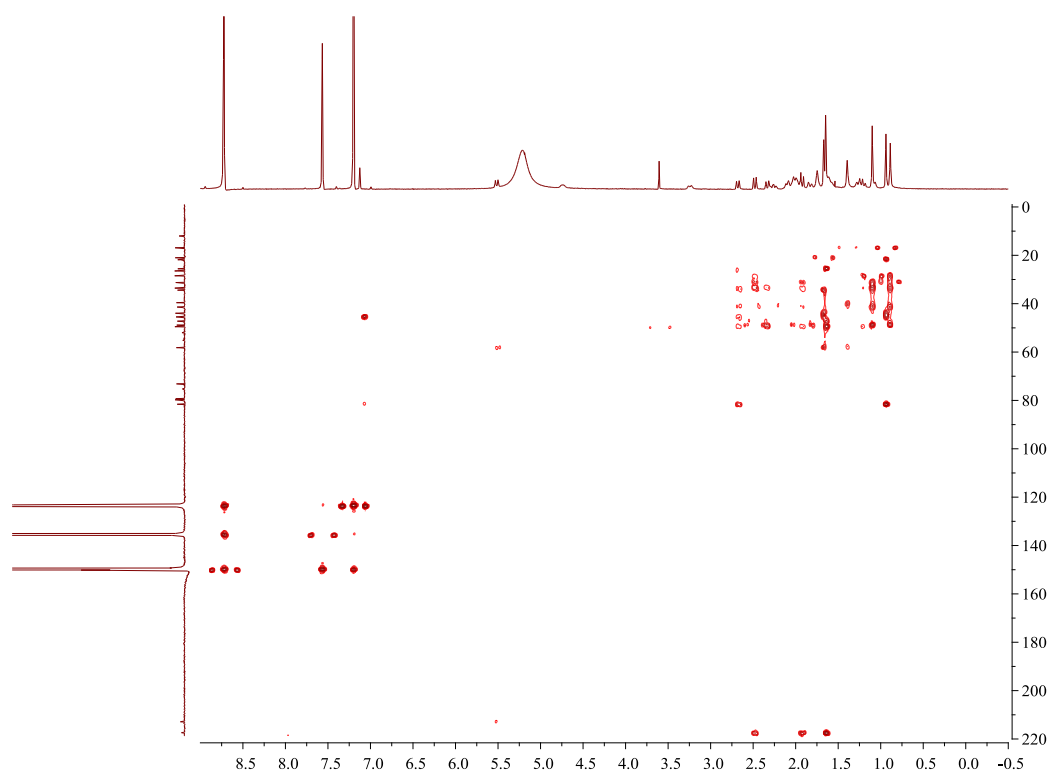

**Fig. S130.** HMBC spectrum of compound **14**-expansion.

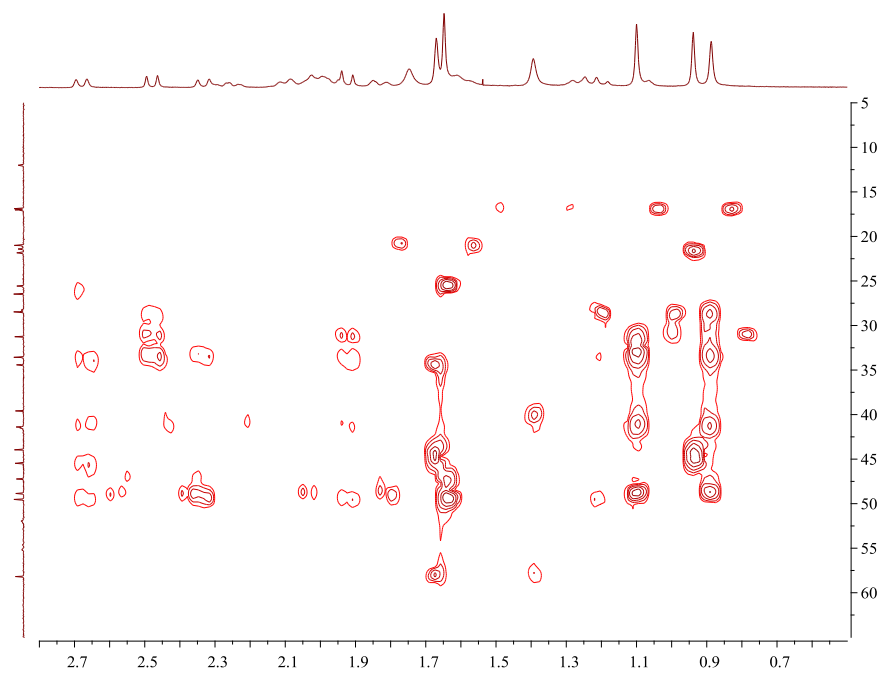

**Fig. S131.** ROESY spectrum of compound **14** in C<sub>5</sub>D<sub>5</sub>N (600 MHz).

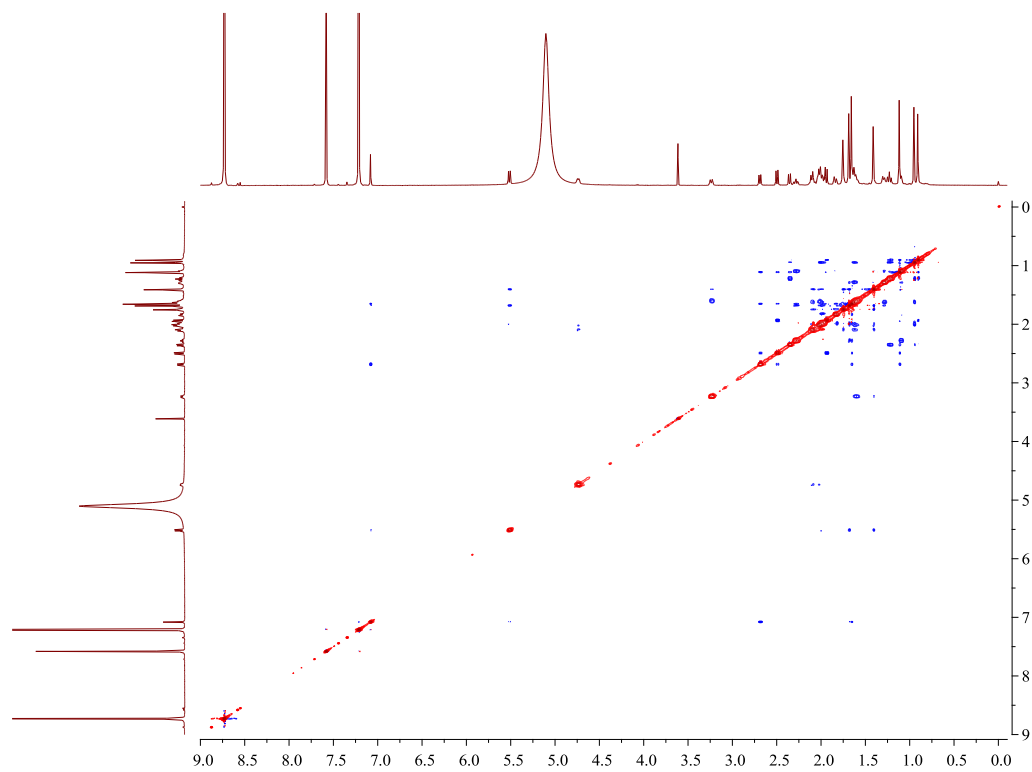

**Fig. S132.** HRESIMS report of compound **14**.

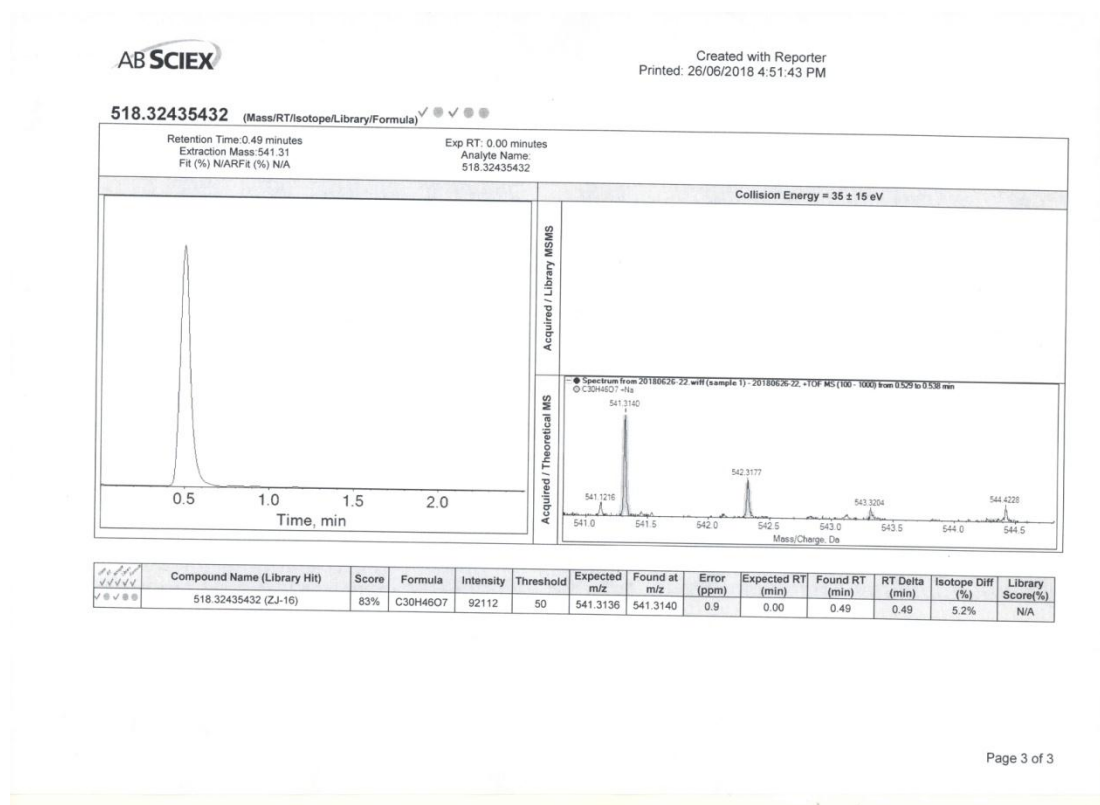

---

**Table S1.** Crystal data and structure refinement for stewartiacid A (1)

---

|                                   |                                                |                            |
|-----------------------------------|------------------------------------------------|----------------------------|
| Identification code               | mjr17084_0m                                    |                            |
| Empirical formula                 | C <sub>30</sub> H <sub>46</sub> O <sub>6</sub> |                            |
| Formula weight                    | 502.67                                         |                            |
| Temperature                       | 170 K                                          |                            |
| Wavelength                        | 1.34139 Å                                      |                            |
| Crystal system                    | Monoclinic                                     |                            |
| Space group                       | P 1 21 1                                       |                            |
| Unit cell dimensions              | a = 14.2747(19) Å                              | $\alpha = 90^\circ$        |
|                                   | b = 6.4197(9) Å                                | $\beta = 105.303(9)^\circ$ |
|                                   | c = 14.897(2) Å                                | $\gamma = 90^\circ$        |
| Volume                            | 1316.7(3) Å <sup>3</sup>                       |                            |
| Z                                 | 2                                              |                            |
| Density (calculated)              | 1.268 Mg/m <sup>3</sup>                        |                            |
| Absorption coefficient            | 0.444 mm <sup>-1</sup>                         |                            |
| F(000)                            | 548                                            |                            |
| Crystal size                      | 0.05 x 0.02 x 0.01 mm <sup>3</sup>             |                            |
| Theta range for data collection   | 3.319 to 55.147 °                              |                            |
| Index ranges                      | -17<=h<=17, -7<=k<=7, -16<=l<=18               |                            |
| Reflections collected             | 14495                                          |                            |
| Independent reflections           | 4786 [R(int) = 0.0521]                         |                            |
| Completeness to theta =           | 99.2%                                          |                            |
| Absorption correction             | Semi-empirical from equivalents                |                            |
| Max. and min. transmission        | 0.7508 and 0.4336                              |                            |
| Refinement method                 | Full-matrix least-squares on F <sup>2</sup>    |                            |
| Data / restraints / parameters    | 4786 / 1 / 343                                 |                            |
| Goodness-of-fit on F <sup>2</sup> | 1.061                                          |                            |
| Final R indices [I>2sigma(I)]     | R1 = 0.0683, wR2 = 0.1556                      |                            |
| R indices (all data)              | R1 = 0.0866, wR2 = 0.1718                      |                            |
| Absolute structure parameter      | 0.19(17)                                       |                            |
| Extinction coefficient            | 0.0051(14)                                     |                            |
| Largest diff. peak and hole       | 0.323 and -0.320 e.Å <sup>-3</sup>             |                            |

---

---

**Table S2.** Crystal data and structure refinement for stewartiacid C (3)

---

|                                   |                                                |          |
|-----------------------------------|------------------------------------------------|----------|
| Identification code               | 191209wj_0m                                    |          |
| Empirical formula                 | C <sub>30</sub> H <sub>50</sub> O <sub>9</sub> |          |
| Formula weight                    | 554.70                                         |          |
| Temperature                       | 169.98 K                                       |          |
| Wavelength                        | 1.34139 Å                                      |          |
| Crystal system                    | Orthorhombic                                   |          |
| Space group                       | P2 <sub>1</sub> 2 <sub>1</sub> 2 <sub>1</sub>  |          |
| Unit cell dimensions              | a = 8.0649(6) Å                                | α = 90 ° |
|                                   | b = 11.3973(8) Å                               | β = 90 ° |
|                                   | c = 32.416(2) Å                                | γ = 90 ° |
| Volume                            | 2979.6(4) Å <sup>3</sup>                       |          |
| Z                                 | 4                                              |          |
| Density (calculated)              | 1.237 Mg/m <sup>3</sup>                        |          |
| Absorption coefficient            | 0.471 mm <sup>-1</sup>                         |          |
| F (000)                           | 1208                                           |          |
| Crystal size                      | 0.15 x 0.1 x 0.008 mm <sup>3</sup>             |          |
| Theta range for data collection   | 3.576 to 55.060 °                              |          |
| Index ranges                      | -9<=h<=7, -11<=k<=13, -39<=l<=39               |          |
| Reflections collected             | 21220                                          |          |
| Independent reflections           | 5558 [R (int) = 0.0705]                        |          |
| Completeness to theta = 53.594 °  | 98.5 %                                         |          |
| Absorption correction             | Semi-empirical from equivalents                |          |
| Max. and min. transmission        | 0.7508 and 0.3675                              |          |
| Refinement method                 | Full-matrix least-squares on F <sup>2</sup>    |          |
| Data / restraints / parameters    | 5558 / 0 / 372                                 |          |
| Goodness-of-fit on F <sup>2</sup> | 1.031                                          |          |
| Final R indices [I>2 sigma (I)]   | R1 = 0.0949, wR2 = 0.2521                      |          |
| R indices (all data)              | R1 = 0.1371, wR2 = 0.2937                      |          |
| Absolute structure parameter      | -0.01(19)                                      |          |
| Extinction coefficient            | 0.029(4)                                       |          |
| Largest diff. peak and hole       | 0.292 and -0.310 e.Å <sup>-3</sup>             |          |

---

---

**Table S3.** Crystal data and structure refinement for stewartiacid D (4).

---

|                                   |                                                |                  |
|-----------------------------------|------------------------------------------------|------------------|
| Identification code               | mjl18283_0m                                    |                  |
| Empirical formula                 | C <sub>30</sub> H <sub>46</sub> O <sub>6</sub> |                  |
| Formula weight                    | 502.67                                         |                  |
| Temperature                       | 170.0 K                                        |                  |
| Wavelength                        | 1.34139 Å                                      |                  |
| Crystal system                    | Monoclinic                                     |                  |
| Space group                       | P 1 21 1                                       |                  |
| Unit cell dimensions              | a = 13.9664(4) Å                               | α = 90 °         |
|                                   | b = 6.5552(2) Å                                | β = 104.366(2) ° |
|                                   | c = 15.1284(5) Å                               | γ = 90 °         |
| Volume                            | 1341.73(7) Å <sup>3</sup>                      |                  |
| Z                                 | 2                                              |                  |
| Density (calculated)              | 1.244 Mg/m <sup>3</sup>                        |                  |
| Absorption coefficient            | 0.436 mm <sup>-1</sup>                         |                  |
| F (000)                           | 548                                            |                  |
| Crystal size                      | 0.1 x 0.02 x 0.01 mm <sup>3</sup>              |                  |
| Theta range for data collection   | 2.841 to 54.870 °                              |                  |
| Index ranges                      | -17<=h<=17, -7<=k<=7, -18<=l<=18               |                  |
| Reflections collected             | 20123                                          |                  |
| Independent reflections           | 5048 [R(int) = 0.0530]                         |                  |
| Completeness to theta = 53.594 °  | 99.8 %                                         |                  |
| Absorption correction             | Semi-empirical from equivalents                |                  |
| Max. and min. transmission        | 0.7508 and 0.5858                              |                  |
| Refinement method                 | Full-matrix least-squares on F <sup>2</sup>    |                  |
| Data / restraints / parameters    | 5048 / 1 / 335                                 |                  |
| Goodness-of-fit on F <sup>2</sup> | 1.038                                          |                  |
| Final R indices [I>2 sigma(I)]    | R1 = 0.0534, wR2 = 0.1558                      |                  |
| R indices (all data)              | R1 = 0.0595, wR2 = 0.1613                      |                  |
| Absolute structure parameter      | -0.11(13)                                      |                  |
| Extinction coefficient            | n/a                                            |                  |
| Largest diff. peak and hole       | 1.397 and -0.327 e.Å <sup>-3</sup>             |                  |

---



---

**Table S4.** Crystal data and structure refinement for stewartiacid F (**6**).

---

|                                   |                                                |                    |
|-----------------------------------|------------------------------------------------|--------------------|
| Identification code               | mjl18275_0m                                    |                    |
| Empirical formula                 | C <sub>31</sub> H <sub>52</sub> O <sub>7</sub> |                    |
| Formula weight                    | 536.72                                         |                    |
| Temperature                       | 169.98 K                                       |                    |
| Wavelength                        | 1.34139 Å                                      |                    |
| Crystal system                    | Monoclinic                                     |                    |
| Space group                       | C 1 2 1                                        |                    |
| Unit cell dimensions              | a = 30.9220(6) Å                               | α = 90 °           |
|                                   | b = 13.9294(3) Å                               | β = 107.9170(10) ° |
|                                   | c = 14.7361(3) Å                               | γ = 90 °           |
| Volume                            | 6039.4(2) Å <sup>3</sup>                       |                    |
| Z                                 | 8                                              |                    |
| Density (calculated)              | 1.181 Mg/m <sup>3</sup>                        |                    |
| Absorption coefficient            | 0.421 mm <sup>-1</sup>                         |                    |
| F(000)                            | 2352                                           |                    |
| Crystal size                      | 0.15 x 0.1 x 0.02 mm <sup>3</sup>              |                    |
| Theta range for data collection   | 3.054 to 55.014 °                              |                    |
| Index ranges                      | -37 ≤ h ≤ 37, -16 ≤ k ≤ 16, -17 ≤ l ≤ 18       |                    |
| Reflections collected             | 48612                                          |                    |
| Independent reflections           | 11459 [R(int) = 0.0507]                        |                    |
| Completeness to theta = 53.594 °  | 99.6 %                                         |                    |
| Absorption correction             | Semi-empirical from equivalents                |                    |
| Max. and min. transmission        | 0.7508 and 0.5610                              |                    |
| Refinement method                 | Full-matrix least-squares on F <sup>2</sup>    |                    |
| Data / restraints / parameters    | 11459 / 13 / 710                               |                    |
| Goodness-of-fit on F <sup>2</sup> | 1.038                                          |                    |
| Final R indices [I > 2 sigma(I)]  | R1 = 0.0875, wR2 = 0.2556                      |                    |
| R indices (all data)              | R1 = 0.0955, wR2 = 0.2669                      |                    |
| Absolute structure parameter      | 0.10(8)                                        |                    |
| Extinction coefficient            | 0.0029(7)                                      |                    |
| Largest diff. peak and hole       | 1.152 and -0.472 e.Å <sup>-3</sup>             |                    |

---
